# Supplementary material for: Rational Design of Enhanced Nme2Cas9 and Nme2SmuCas9 Nucleases and Base Editors
Source: PubMed Central journal article supplement — bioRxiv. 2024 Nov 7:2024.10.30.620986. Preprint. [Version 2] doi: 10.1101/2024.10.30.620986 (PMC11565991; doi:10.1101/2024.10.30.620986), 2024-11-07
Supplement: NIHPP2024.10.30.620986v2-supplement-4.pdf [file NIHPP2024.10.30.620986v2-supplement-4.pdf]

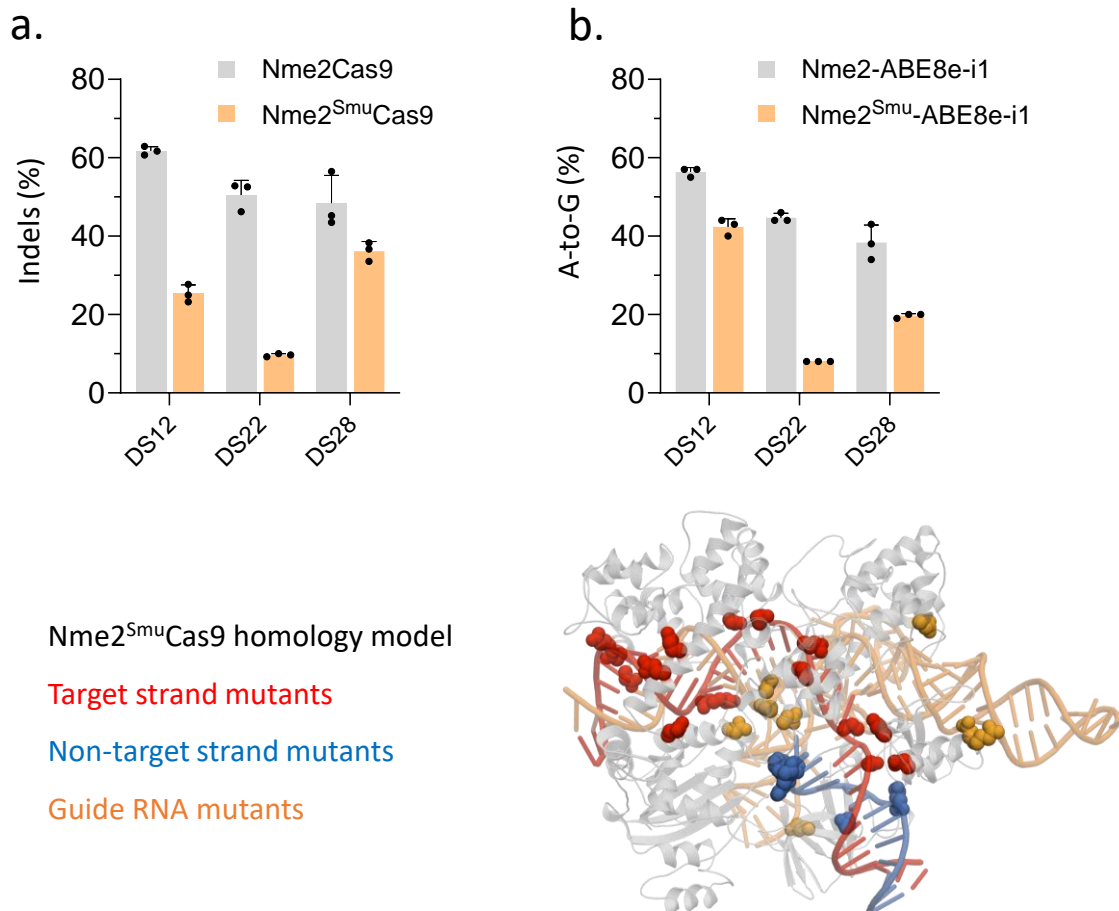

**Supplementary Figure 1. PID-chimeric Nme2<sup>Smu</sup>Cas9 nucleases and ABEs perform poorly at N<sub>4</sub>CC targets compared to WT PID Nme2Cas9 effectors.** (a) Nuclease editing, following transfection of Nme2- or Nme2<sup>Smu</sup>Cas9 and associated sgRNA plasmids, at endogenous N<sub>4</sub>CC PAM genomic loci in HEK293T cells. Editing efficiencies were measured by amplicon deep sequencing (n = 3 biological replicates; data represent mean ± SD). (b) Editing with Nme2- or Nme2<sup>Smu</sup>-ABE8e-i1 plasmids at N<sub>4</sub>CC PAM target loci in HEK293T cells. The editing efficiency at the maximally edited adenine for each target was plotted. Editing efficiencies were measured by amplicon deep sequencing (n = 3 biological replicates; data represent mean ± SD).

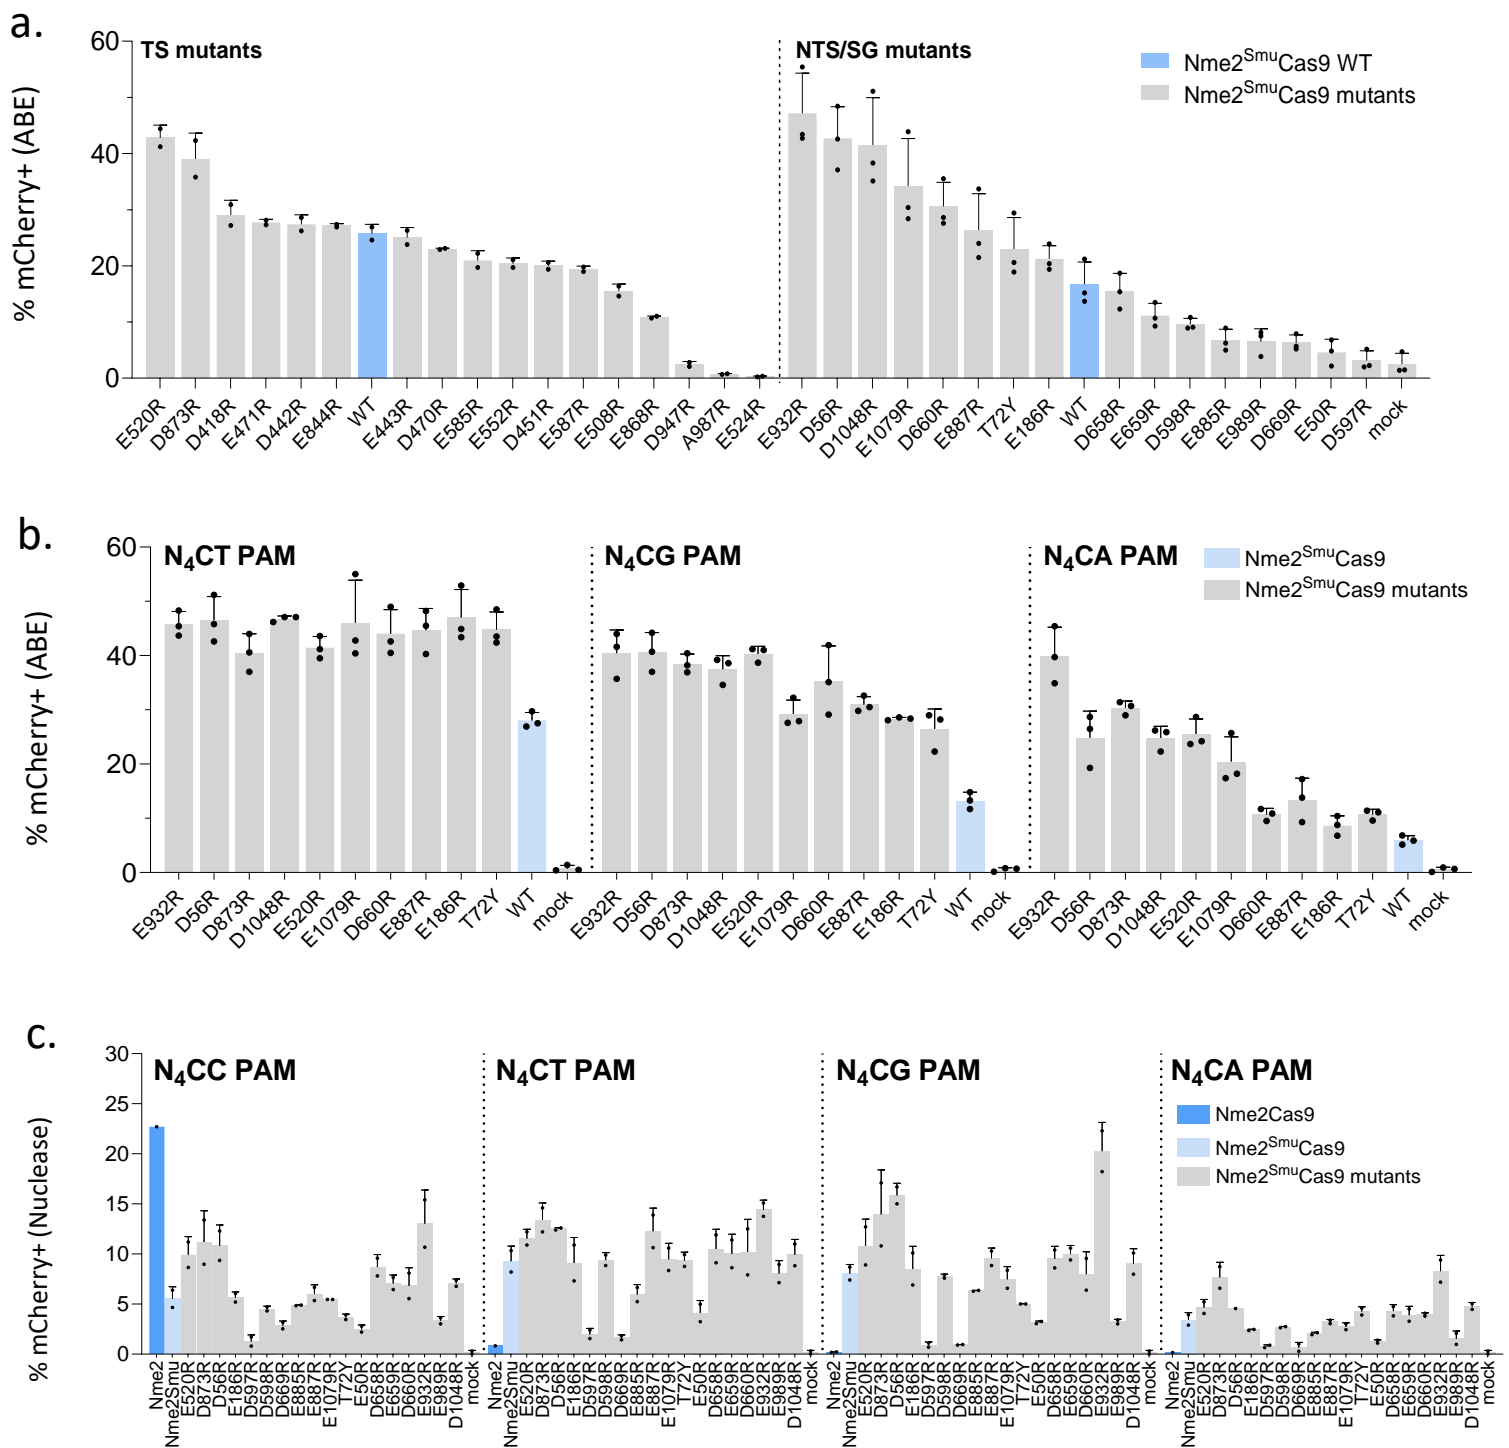

**Supplementary Figure 2. Arginine mutagenesis improves Nme2<sup>Smu</sup>Cas9 effector activity.** (a) Activities of Nme2<sup>Smu</sup>-ABE8e-i1 (denoted as WT, blue bar) and nucleic acid-interacting arginine mutants [target DNA strand (TS), single guide RNA (SG), and non-target DNA strand (NTS)] denoted by amino acid substitution (grey bars) in the mCherry ABE reporter cell line (activated upon A-to-G editing). After plasmid transfection with an N<sub>4</sub>CC PAM-targeting sgRNA plasmid and an effector-expressing plasmid, editing activities were measured by flow cytometry (n = 2 or 3 biological replicates; data represent mean ± SD). (b) Activities of Nme2<sup>Smu</sup>-ABE8e-i1 and the top 10 performing arginine mutants in the mCherry ABE reporter cell line (activated upon A-to-G editing) at N<sub>4</sub>CD (D = not C) PAM targets. After plasmid transfection with the associated sgRNA plasmid and the effector-expressing plasmid, activities were measured by flow cytometry (n = 3 biological replicates; data represent mean ± SD). (c) Activities of Nme2Cas9 nuclease variants within the HEK293T TLR-MCV1 reporter at N<sub>4</sub>CC, N<sub>4</sub>CT, N<sub>4</sub>CG and N<sub>4</sub>CA PAM targets, comparing Nme2Cas9 (dark blue), Nme2<sup>Smu</sup>Cas9 (light blue), and Nme2<sup>Smu</sup>Cas9 arginine mutants (grey). After parallel plasmid transfection with the sgRNA and nuclease effector plasmids, activities were measured by flow cytometry (n = 2 biological replicates; data represent mean ± SD).

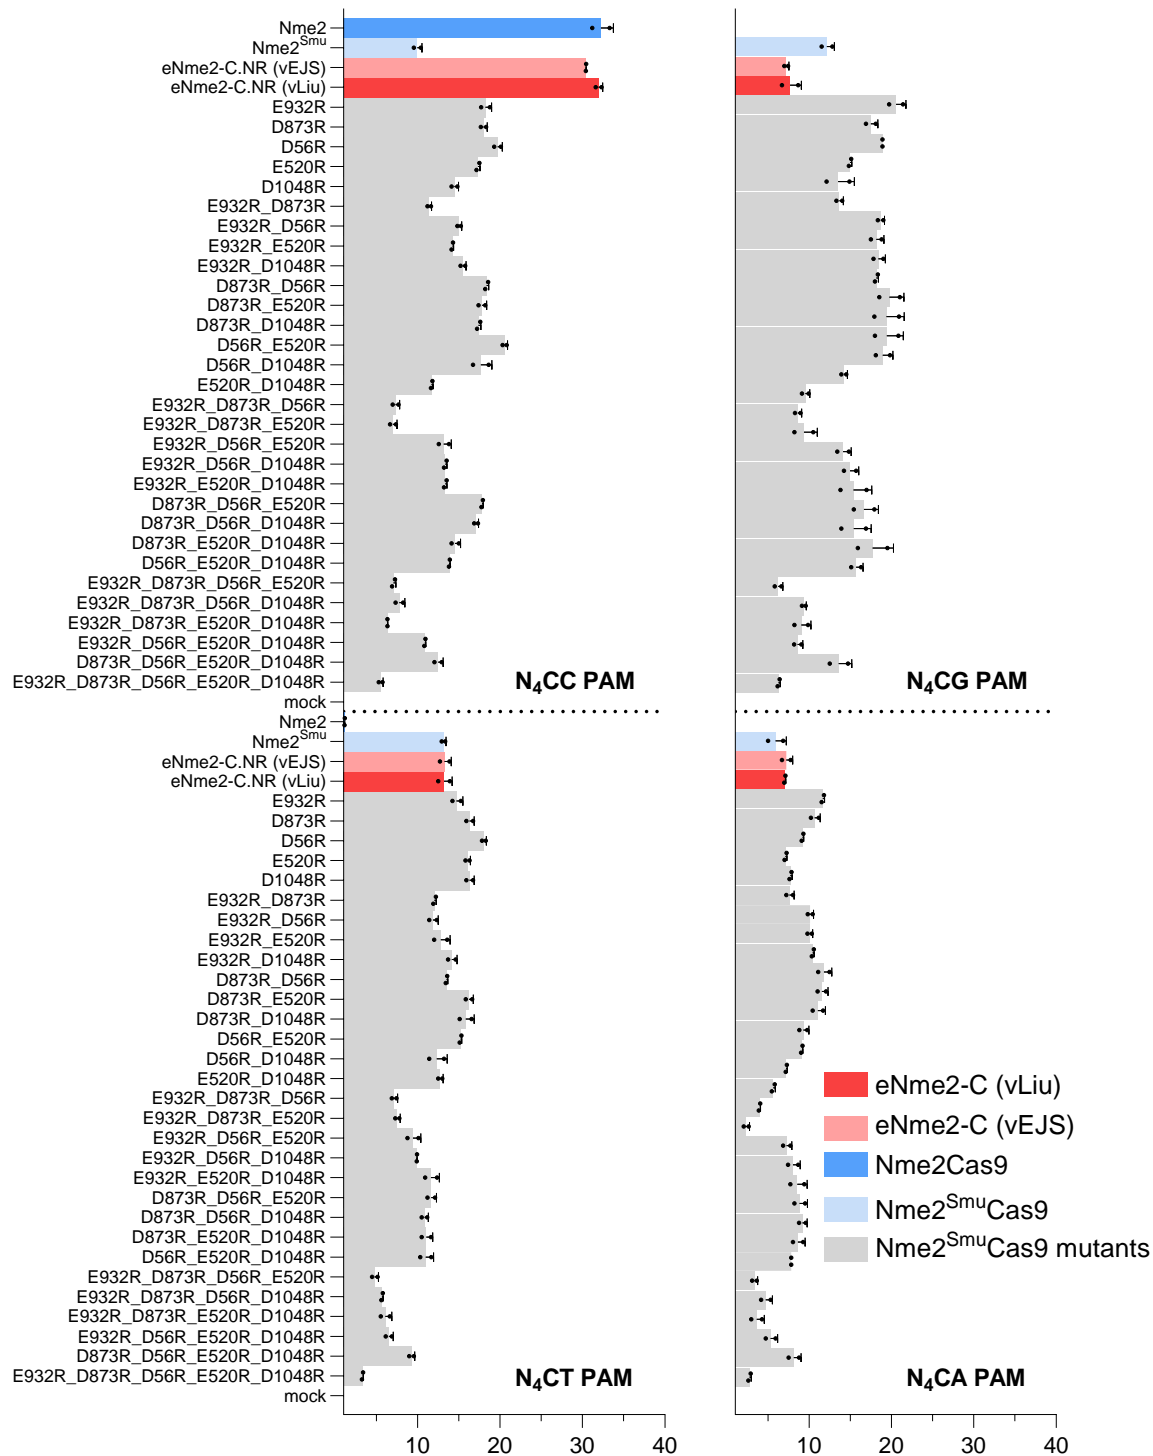

**Supplementary Figure 3. Arginine mutagenesis improves Nme2<sup>Smu</sup>Cas9 nuclease activity.** Activities of Nme2Cas9 nuclease variants with the HEK293T TLR-MCV1 reporter at N<sub>4</sub>CC, N<sub>4</sub>CT, N<sub>4</sub>CG and N<sub>4</sub>CA PAM targets, comparing Nme2Cas9, eNme2-C.NR (vLiu), eNme2-C.NR (vEJS), Nme2<sup>Smu</sup>Cas9, and Nme2<sup>Smu</sup>Cas9 single and multiple arginine mutants. For eNme2-C.NR, vLiu is the original plasmid obtained from Addgene (#185672), whereas vEJS is the same effector re-cloned into the expression plasmid backbone used for all other effectors in this experiment. Activities were measured after parallel plasmid transfection with sgRNA and nuclease editor plasmids, followed by flow cytometry (n = 2 biological replicates; data represent mean ± SD).

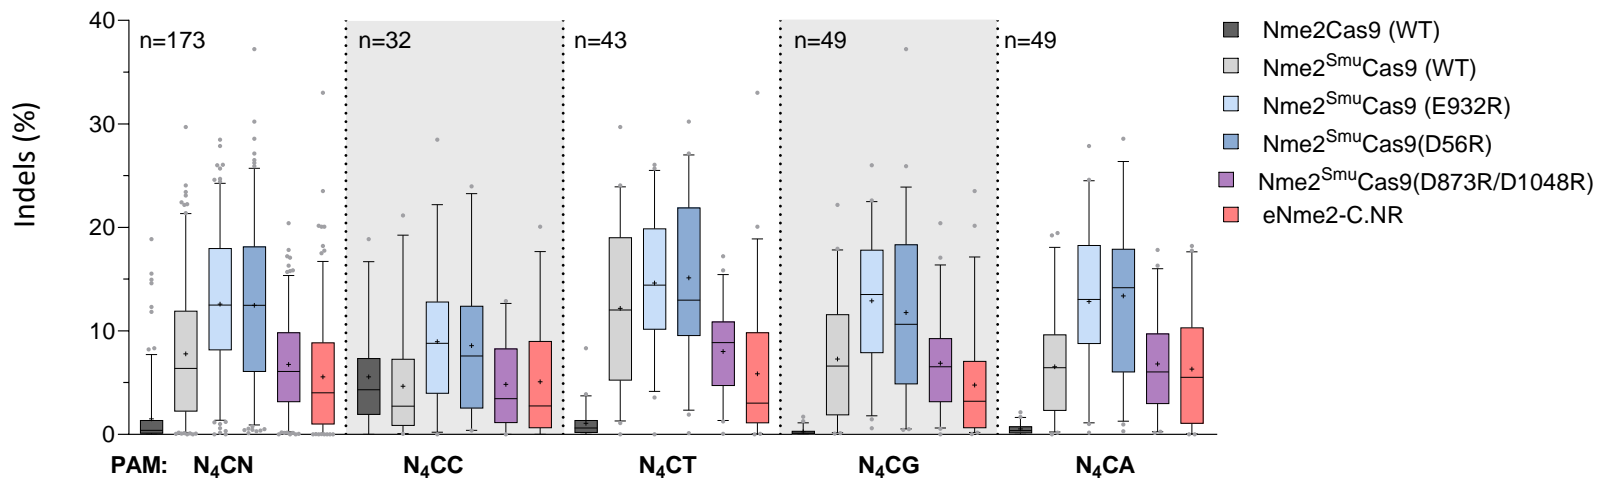

**Supplementary Figure 4. Activities of Nme2<sup>Smu</sup>Cas9 nuclease variants.** Nuclease-induced indels in experimental panel 1 of the guide-target activity library following plasmid transfection of Nme2Cas9 (WT), Nme2<sup>Smu</sup>Cas9 (WT and E932R, D56R, and E520R/D873R variants) or eNme2-C.NR into HEK293T cells. The editing efficiencies for 173 target sites were plotted. Editing activities were measured by amplicon sequencing (n = 3 biological replicates; boxplots represent median and interquartile range; whiskers indicate 5th and 95th percentiles and the cross represents the mean).

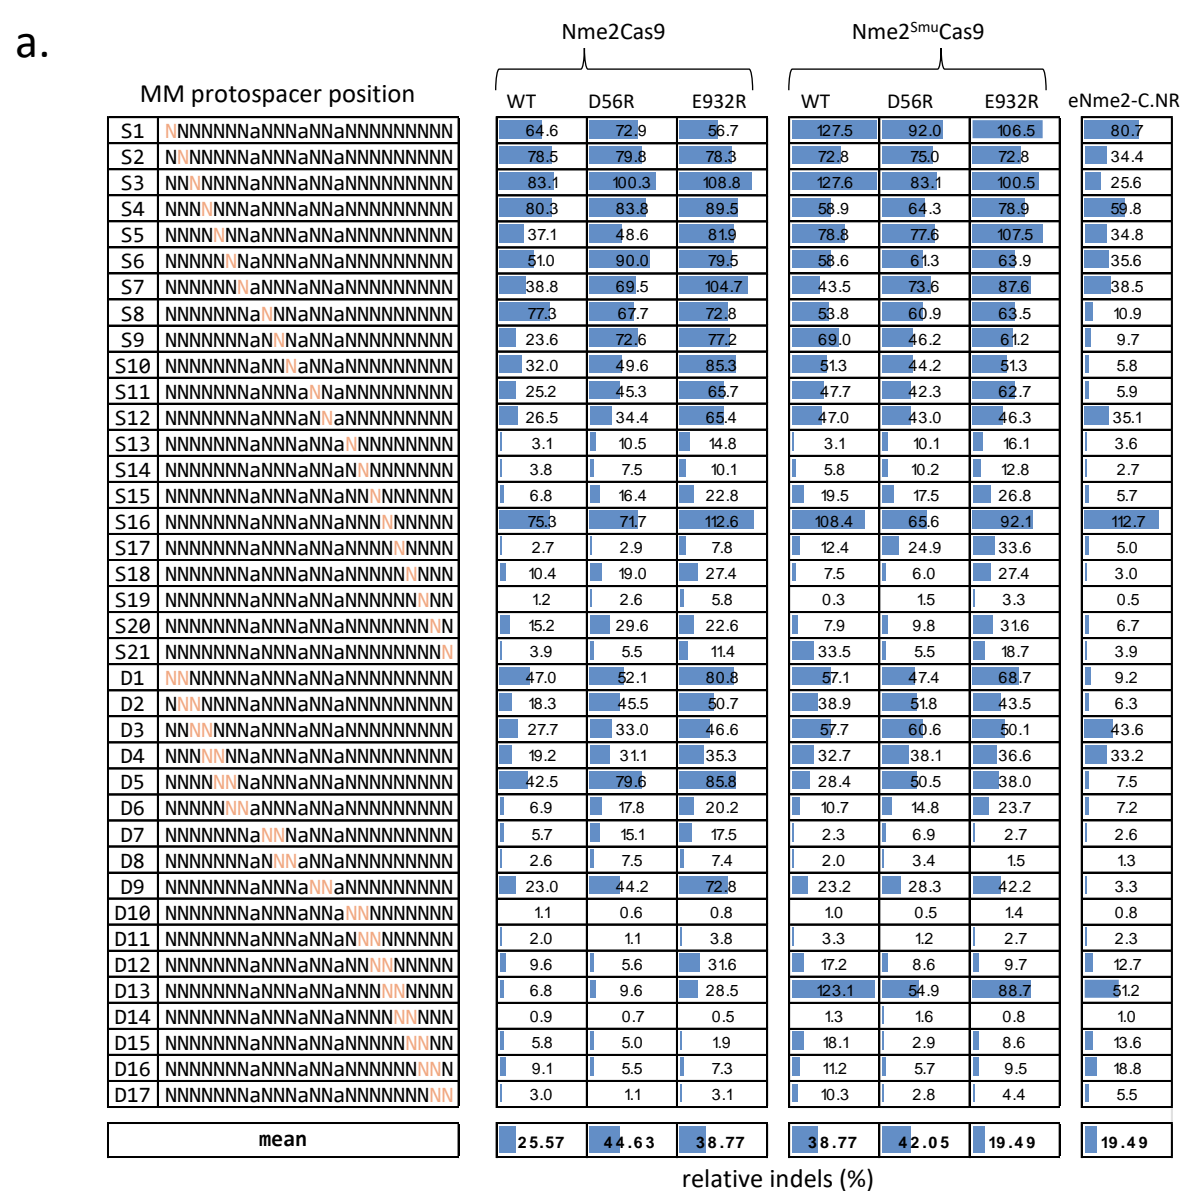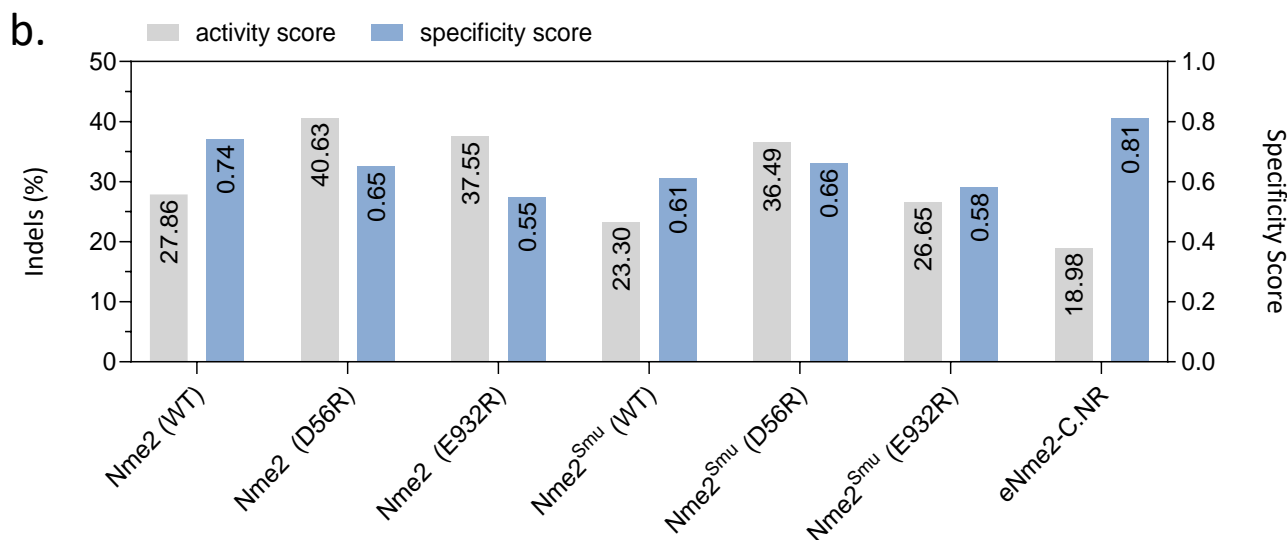

**Supplementary Figure 5. Specificities of Nme2- and Nme2<sup>Smu</sup>Cas9 nucleases at N<sub>4</sub>CC PAM targets.** (a) Indel editing frequencies of Nme2Cas9, Nme2<sup>Smu</sup>Cas9 variants, and eNme2-C.NR across single- (S) or di-nucleotide (D) mismatched target sites within the guide-target mismatch library. Activities for each mismatched target were normalized to the mean efficiency of their respective perfectly-matched target site. Orange nucleotides represent protospacer positions of the transversion mutation(s) present within the mismatched target site. (b) indel activity vs. specificity score for nuclease variants from (a) across the mismatched guide-target library. Nuclease activity was compiled from editing data for three perfectly matched N<sub>4</sub>CC target sites (0 MM) (**Supplementary data file**). The specificity score was calculated as one minus the tiled mismatched editing mean from (a), normalized to a scale of one to 100. Editing activities were measured by amplicon sequencing (n = 3 biological replicates).

a.

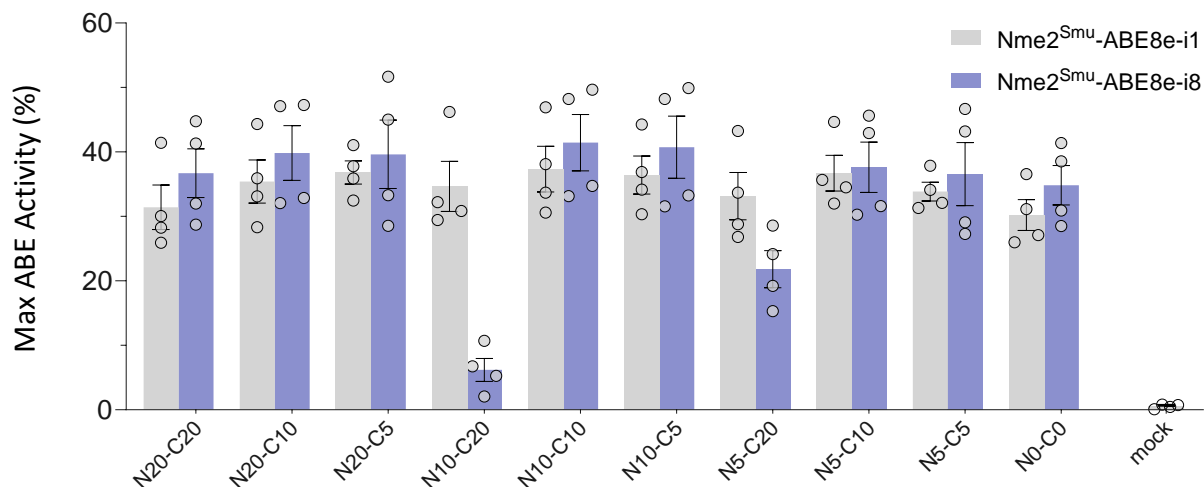

b.

| Effector                      | N-Linker Length | C-Linker Length |
|-------------------------------|-----------------|-----------------|
| Nme2 <sup>Smu</sup> -ABE8e-i1 | 20              | 20              |
| Nme2 <sup>Smu</sup> -ABE8e-i1 | 20              | 10              |
| Nme2 <sup>Smu</sup> -ABE8e-i1 | 20              | 5               |
| Nme2 <sup>Smu</sup> -ABE8e-i1 | 10              | 20              |
| Nme2 <sup>Smu</sup> -ABE8e-i1 | 10              | 10              |
| Nme2 <sup>Smu</sup> -ABE8e-i1 | 10              | 5               |
| Nme2 <sup>Smu</sup> -ABE8e-i1 | 5               | 20              |
| Nme2 <sup>Smu</sup> -ABE8e-i1 | 5               | 10              |
| Nme2 <sup>Smu</sup> -ABE8e-i1 | 5               | 5               |
| Nme2 <sup>Smu</sup> -ABE8e-i1 | 0               | 0               |
| Nme2 <sup>Smu</sup> -ABE8e-i8 | 20              | 20              |
| Nme2 <sup>Smu</sup> -ABE8e-i8 | 20              | 10              |
| Nme2 <sup>Smu</sup> -ABE8e-i8 | 20              | 5               |
| Nme2 <sup>Smu</sup> -ABE8e-i8 | 10              | 20              |
| Nme2 <sup>Smu</sup> -ABE8e-i8 | 10              | 10              |
| Nme2 <sup>Smu</sup> -ABE8e-i8 | 10              | 5               |
| Nme2 <sup>Smu</sup> -ABE8e-i8 | 5               | 20              |
| Nme2 <sup>Smu</sup> -ABE8e-i8 | 5               | 10              |
| Nme2 <sup>Smu</sup> -ABE8e-i8 | 5               | 5               |
| Nme2 <sup>Smu</sup> -ABE8e-i8 | 0               | 0               |

**Supplementary Figure 6. Domain-inlaid Nme2<sup>Smu</sup>-ABE8e linker length optimization.** (a) A-to-G editing at four endogenous HEK293T genomic loci with Nme2<sup>Smu</sup>-ABE8e-i1 (grey bars) or Nme2<sup>Smu</sup>-ABE8e-i8 (blue bars) carrying N- or C-terminal (Nx-Cx) linker variants following plasmid transfection. The editing efficiencies at the maximally edited adenine for each target was plotted and aggregated. Data for individual target sites are in the **Supplementary data file**. Editing efficiencies were measured by amplicon deep sequencing (n = 3 biological replicates; data represent mean ± SD).

a.

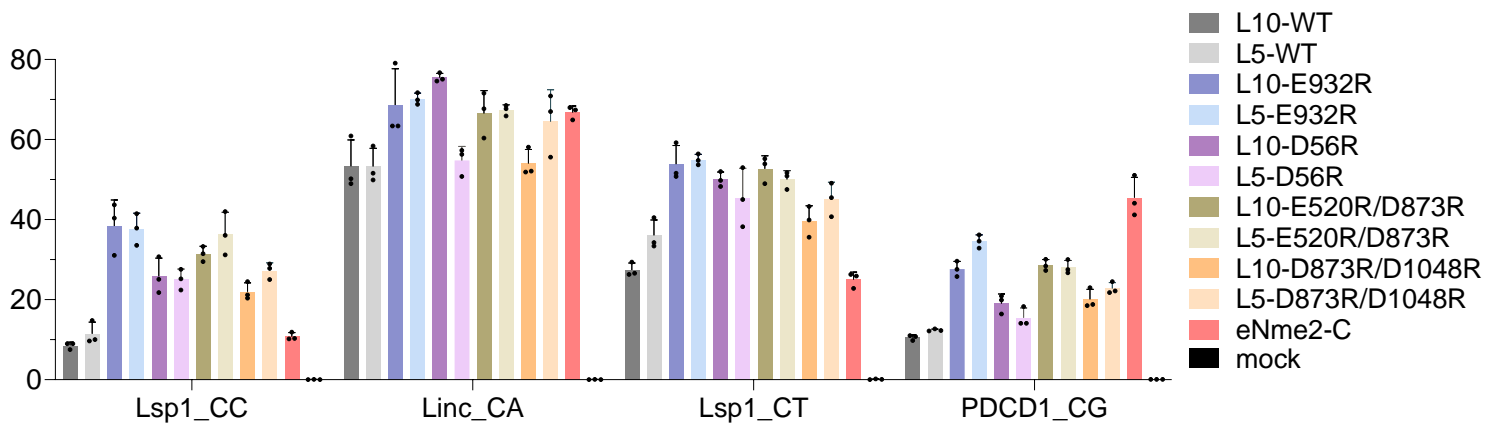

b.

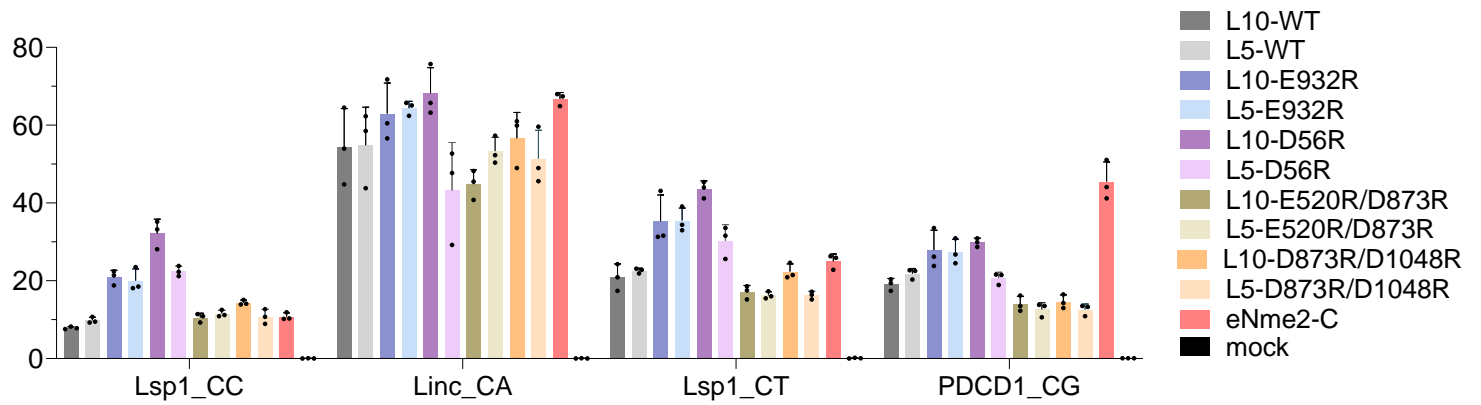

c.

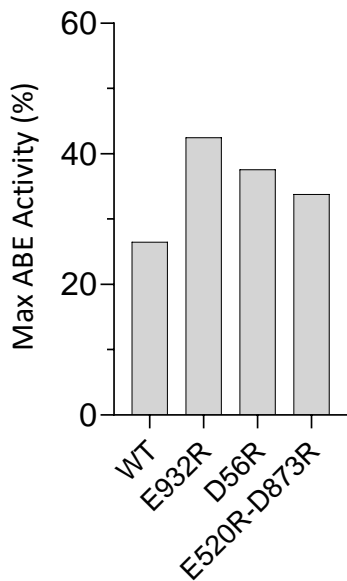

d.

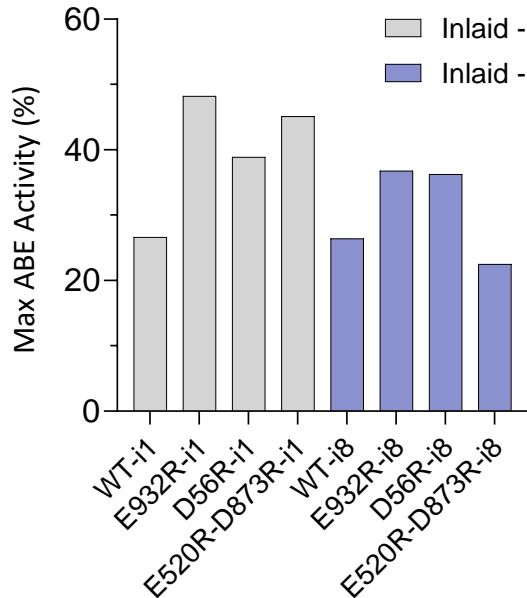

**Supplementary Figure 7. Domain-inlaid Nme2<sup>Smu</sup>-ABE8e linker length and activity optimization (continued).** (a-b) A-to-G editing at four endogenous HEK293T genomic loci with Nme2<sup>Smu</sup>-ABE8e-i1 (a) or Nme2<sup>Smu</sup>-ABE8e-i8 (b) arginine mutants (WT and E932R, D56R, E520R/D873R, D873R/D1048R) and linker (L10, L5) variants by plasmid transfection. The editing efficiency at the maximally edited adenine for each target was plotted. Editing efficiencies were measured by amplicon deep sequencing (n = 3 biological replicates; data represent mean ± SD). Data for individual target sites are in the **Supplementary data file**. (c-d) Summary data from endogenous maximum activity aggregated from (a) and (b). (c) Nme2<sup>Smu</sup>-ABE8e and arginine mutant activity independent of domain insertion site and linker length, or (d) separated by position of domain insertion (-i1 vs. -i8).

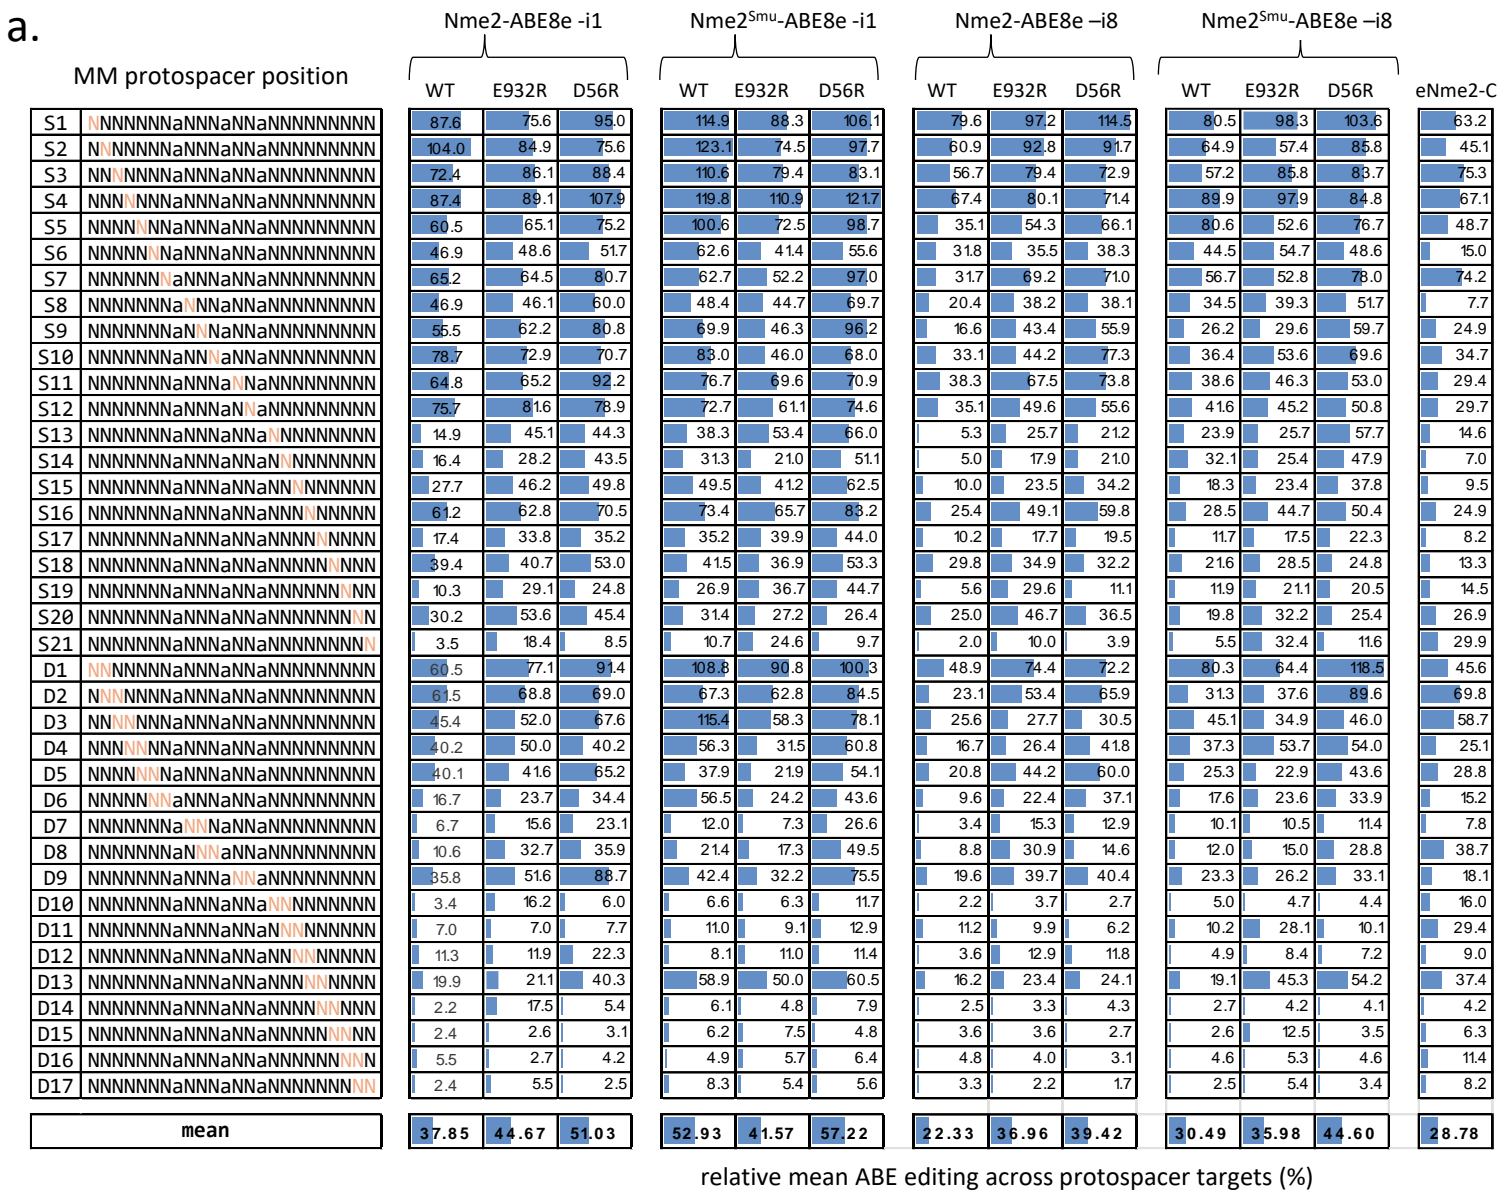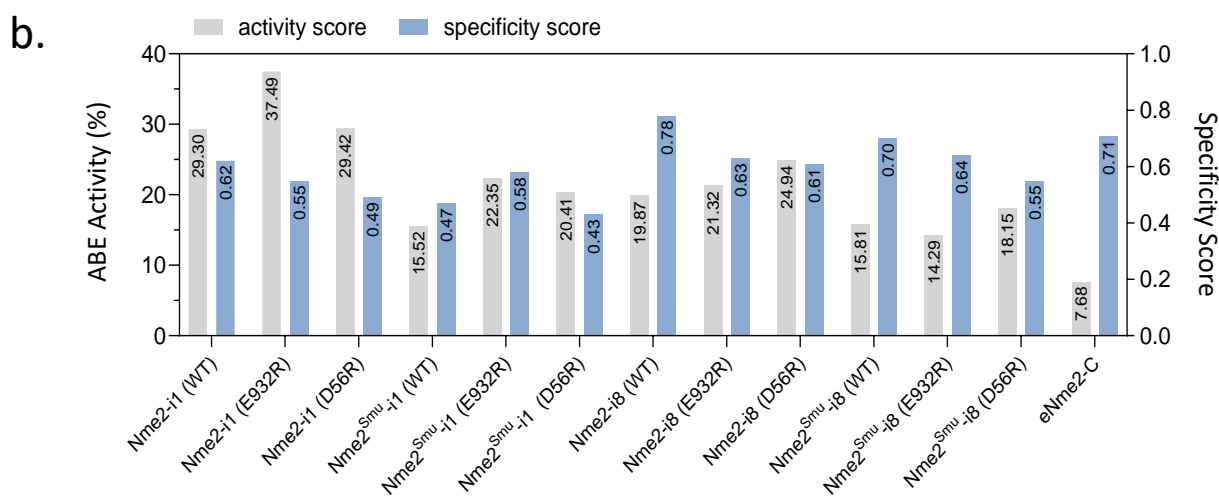

**Supplementary Figure 8. Specificities of domain-inlaid Nme2- and Nme2<sup>Smu</sup>-ABE8e variants at N<sub>4</sub>CC PAM targets. (a)** Mean A-to-G editing frequencies of domain-inlaid Nme2<sup>Smu</sup>-ABE8e variants or eNme2-C across single- (S) or di-nucleotide (D) mismatched target sites within the guide-target mismatch library. Activities for each mismatched target were normalized to the mean efficiency of their respective perfectly matched target site. Orange nucleotides represent protospacer position of the transversion mutation(s) present within the mismatched target site. **(b)** ABE activity vs. specificity score for base editing variants in **(a)** across the mismatched guide-target library. ABE activity was compiled from editing data for three perfectly matched N<sub>4</sub>CC target sites (0 MM) (**Supplementary data file**). The specificity scores were calculated as one minus the tiled mismatched editing mean in **(a)** normalized to a scale of one to 100. Editing activities were measured by amplicon sequencing (n = 3 biological replicates).



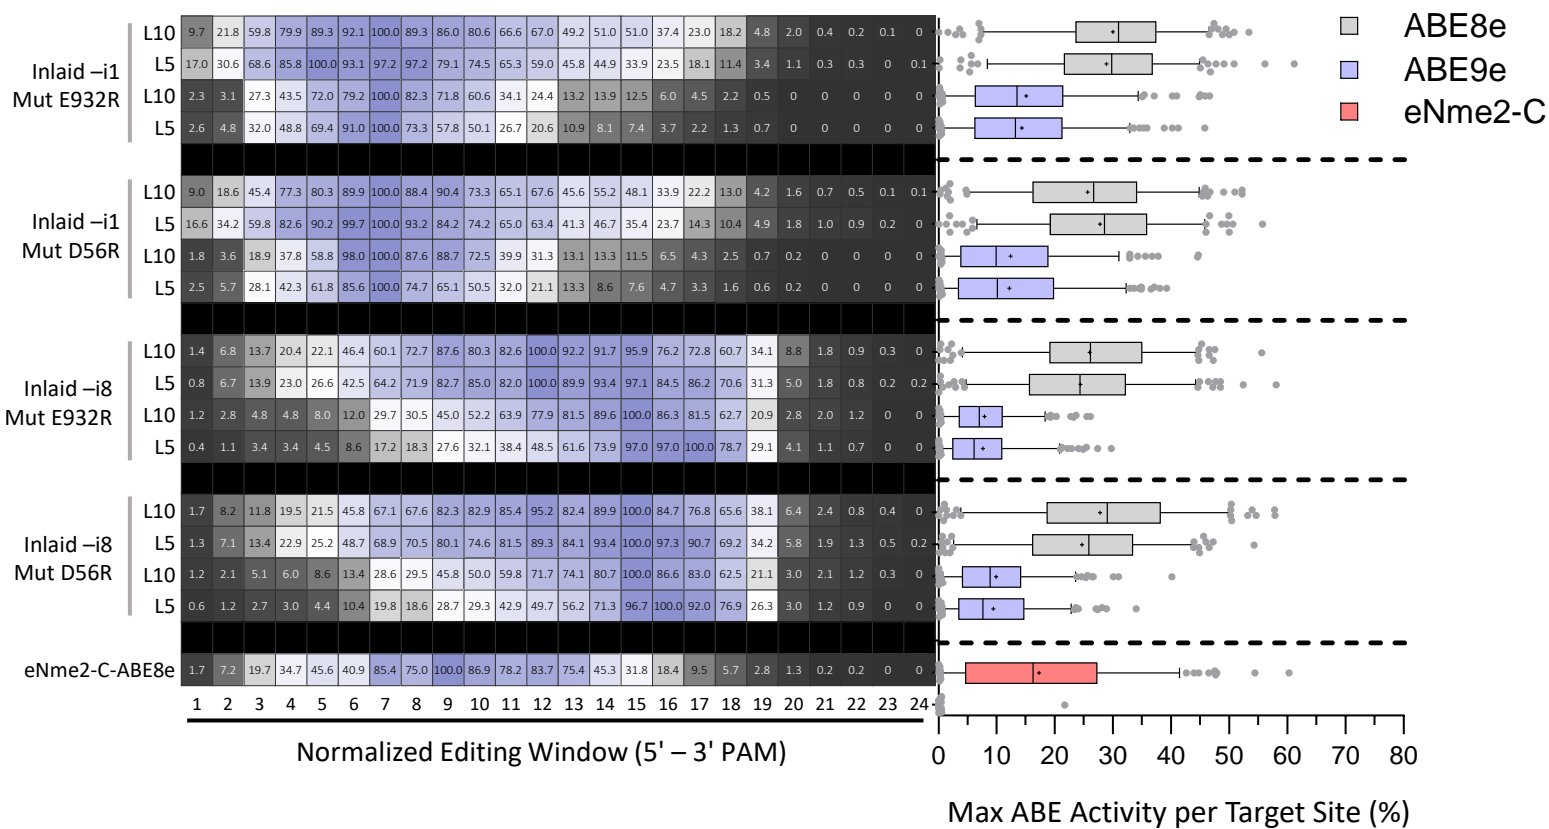

**Supplementary Figure 9. Editing windows of domain-inlaid Nme2<sup>Smu</sup>-ABEs with narrow-window adenine deaminases.** Assessment of editing windows and activities from experimental panel 3 of the guide-target activity library (193 sites) for broad- or narrow-window deaminases (ABE8e or ABE9e, respectively). Test subjects include Nme2<sup>Smu</sup>-ABE -i1 or -i8 with E932R or D56R arginine mutants, in combination with deaminase linker lengths (L10 and L5). The eNme2-C variant was also included (bottom). Editing was assessed following plasmid transfection of the ABE variants into HEK293T cells with the integrated guide-target library. Left: average editing windows across the target sites, normalized on a scale of 0 – 100 (%) against adenine positions with the highest observed edited efficiencies within the window. Right: activity at the maximally edited adenine for each target was plotted. Editing activities were measured by amplicon sequencing (n = 3 biological replicates; boxplots represent median and interquartile ranges; whiskers indicate 5th and 95th percentiles; the cross represents the mean).

a.

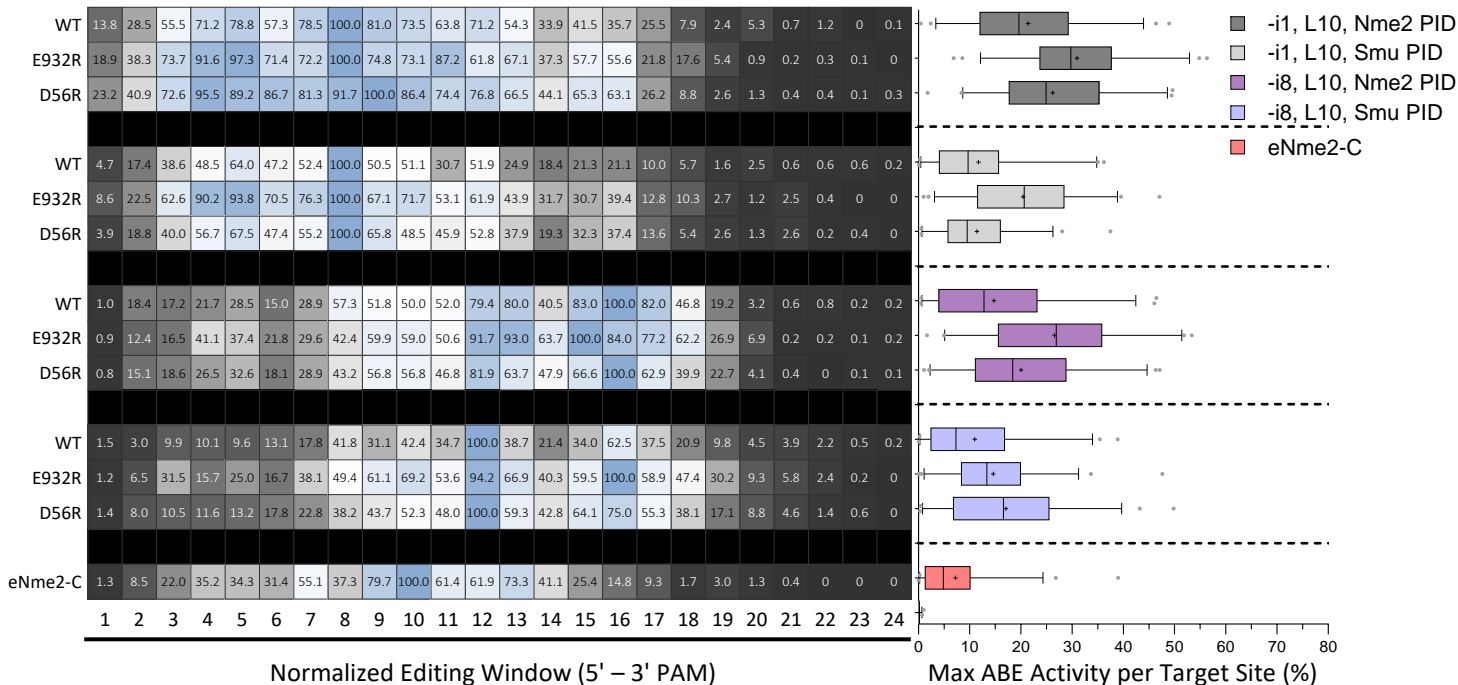

b.

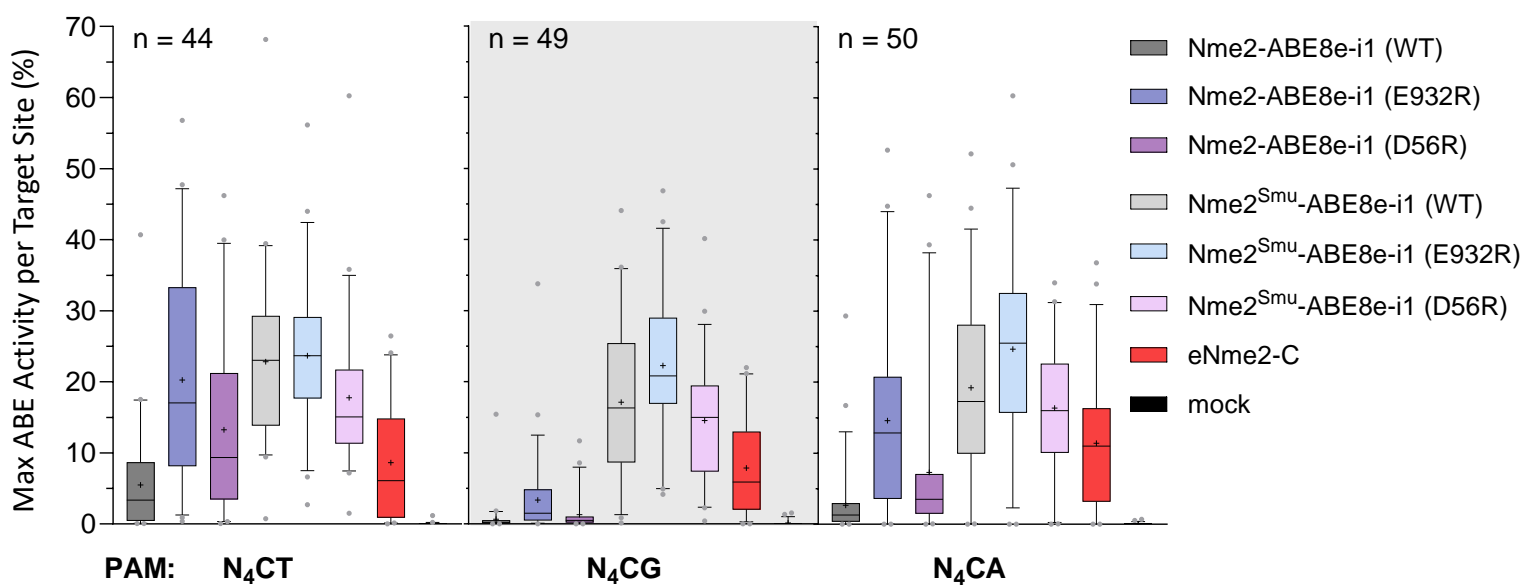

**Supplementary Figure 10. Activities and editing windows of domain-inlaid Nme2- and Nme2<sup>Smu</sup>-ABE8e variants at N<sub>4</sub>CC or N<sub>4</sub>CN PAM targets.** Assessment of editing windows and activities from experimental panel 2 of the guide-target activity library (192 sites) for Nme2- and Nme2<sup>Smu</sup>-ABE8e -i1 or -i8, with and without the E932R or D56R arginine mutations, in combination with the L10 deaminase linker. The eNme2-C variant was also included (bottom). (a) Editing data for N<sub>4</sub>CC PAM targets only (49 sites). Following plasmid transfection of the ABE variants into HEK293T cells with the integrated guide-target library, editing activities were measured by amplicon sequencing. Left: average editing windows across target sites, normalized on a scale of 0 – 100 (%) against adenine positions with the highest observed editing efficiencies within the window. Right: editing efficiency at the maximally edited adenine for each target. (b) Nme2- or Nme2<sup>Smu</sup>-ABE8e-i1 editing data at N<sub>4</sub>CD PAM target sites. The maximally edited adenine for each target was plotted. *n*, the number of target sites with each PAM (*n* = 3 biological replicates; boxplots represent median and interquartile ranges; whiskers indicate 5th and 95th percentiles; the cross represents the mean).

**181 N<sub>4</sub>CN PAM Target Sites**

a.

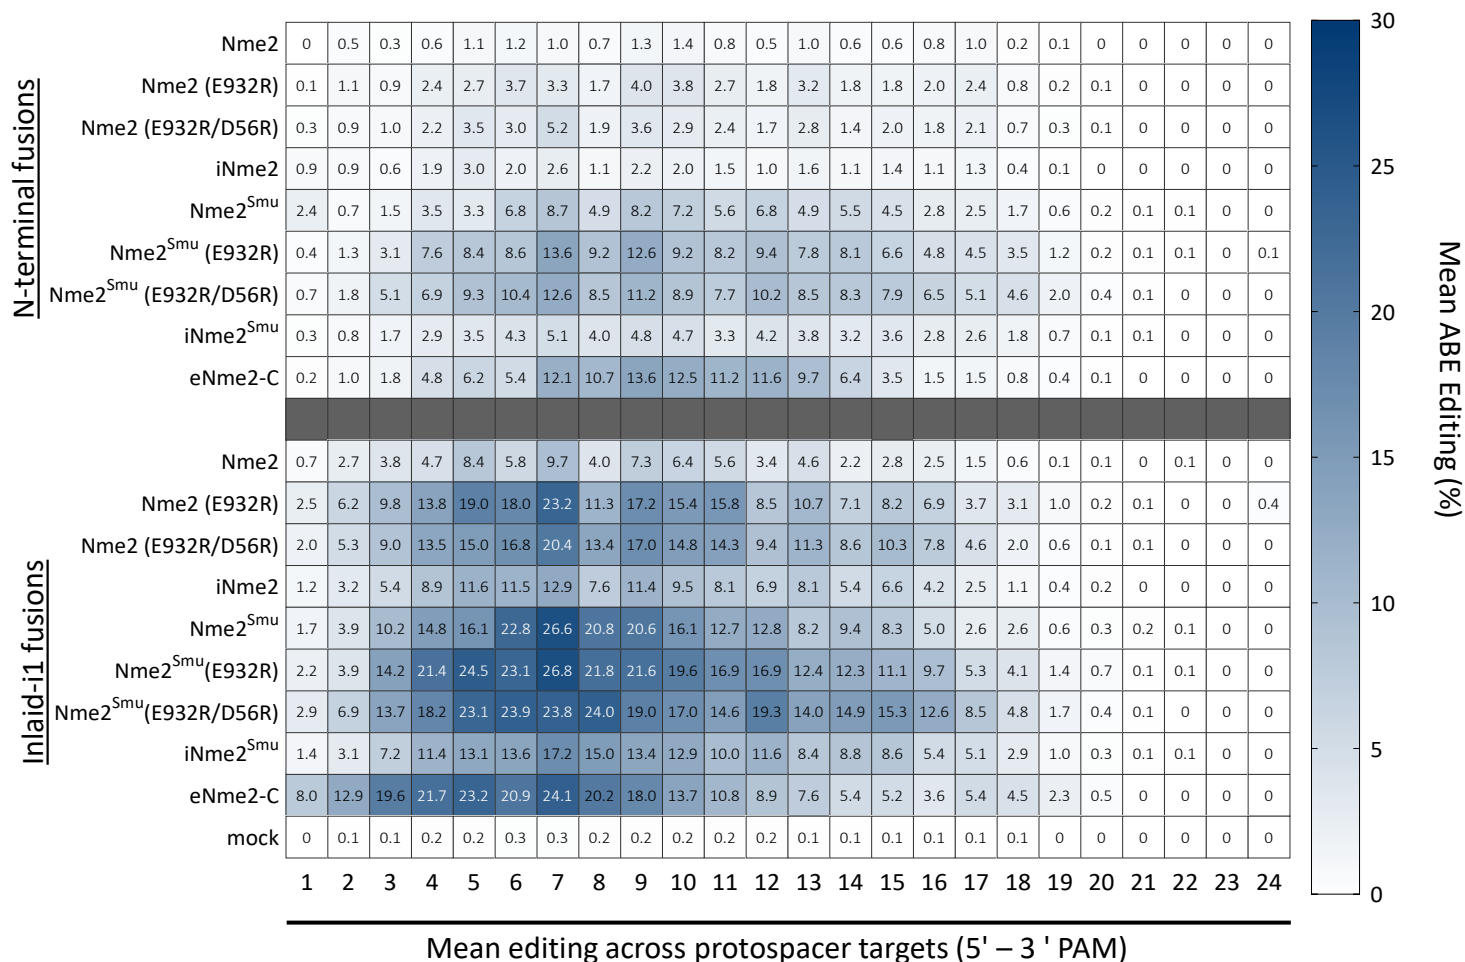

**Supplementary Figure 11. Activities and editing windows of engineered Nme2Cas9 ABE8e variants at N<sub>4</sub>CN PAM targets.** Assessment of editing windows and activities from experimental panel 4 of the guide-target activity library (181 N<sub>4</sub>CN PAM sites) for Nme2-, Nme2<sup>Smu</sup>-, iNme2-, iNme2<sup>Smu</sup>- and eNme2-C variants in either the N-terminal or inlaid-i1 (linker 10) formats. Mean A-to-G editing activities and editing windows across protospacer positions in the activity guide-target library are shown for the engineered Nme2Cas9 ABE8e variants. Editing activities were measured by amplicon sequencing (n = 3 biological replicates).

### 38 N<sub>4</sub>CC PAM Target Sites

a.

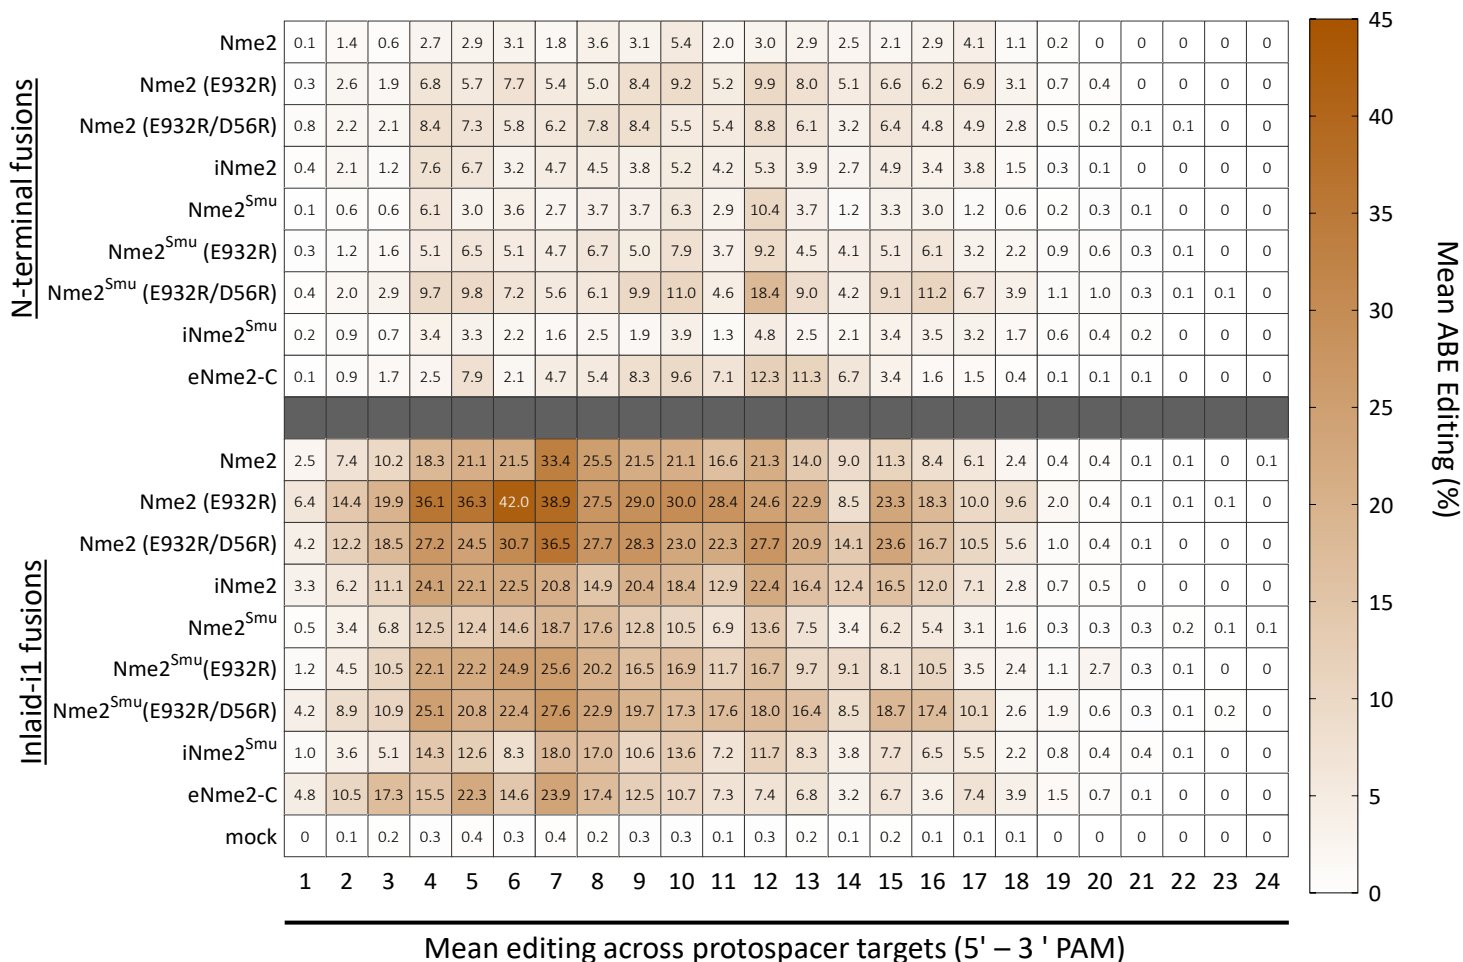

**Supplementary Figure 12. Activities and editing windows of engineered Nme2Cas9 ABE8e variants at N<sub>4</sub>CC PAM targets.** Assessment of editing windows and activities from experimental panel 4 of the guide-target activity library (38 N<sub>4</sub>CC PAM sites) for Nme2-, Nme2<sup>Smu</sup>-, iNme2-, iNme2<sup>Smu</sup>- and eNme2-C variants in either the N-terminal or inlaid-i1 (linker 10) formats. Mean A-to-G editing activities and editing windows across protospacer positions in the activity guide-target library are shown for the engineered Nme2Cas9 ABE8e variants. Editing activities were measured by amplicon sequencing (n = 3 biological replicates).

a.

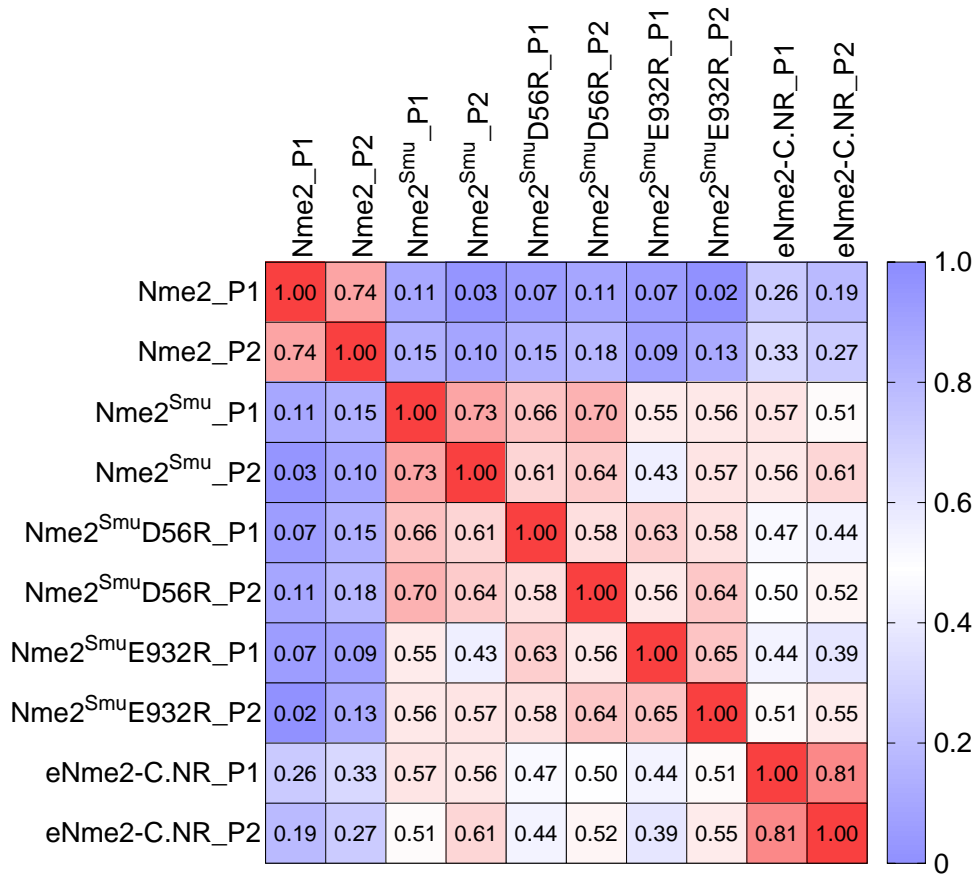

b.

| Sample                         | Pearson r | p value   | CI               | n   |
|--------------------------------|-----------|-----------|------------------|-----|
| Nme2Cas9                       | 0.737     | 1.656E-33 | 0.6642 to 0.7964 | 188 |
| Nme2 <sup>Smu</sup> Cas9       | 0.735     | 3.332E-33 | 0.6614 to 0.7945 | 188 |
| Nme2 <sup>Smu</sup> Cas9 D56R  | 0.582     | 2.005E-18 | 0.4786 to 0.6693 | 188 |
| Nme2 <sup>Smu</sup> Cas9 E932R | 0.654     | 2.486E-24 | 0.5638 to 0.7290 | 188 |
| eNme2-C.NR                     | 0.811     | 3.826E-45 | 0.7554 to 0.8548 | 188 |

**Supplementary Figure 13. Guide-target library quality control for nuclease editing panels. (a)** Pearson correlation between experimental panels of nuclease guide-target library experiments, comparing the mean editing efficiencies of library member target sites. Each experimental panel consisted of 3 biological replicates (Rep1, 2 or 3), compiled from **Supplementary Figure 4** [panel 1, (P1)] and **Figure 2a** [panel 2, (P2)]. **(b)** Summary statistics from (a); CI indicates confidence interval, and *n* indicates number of comparisons used.

a.

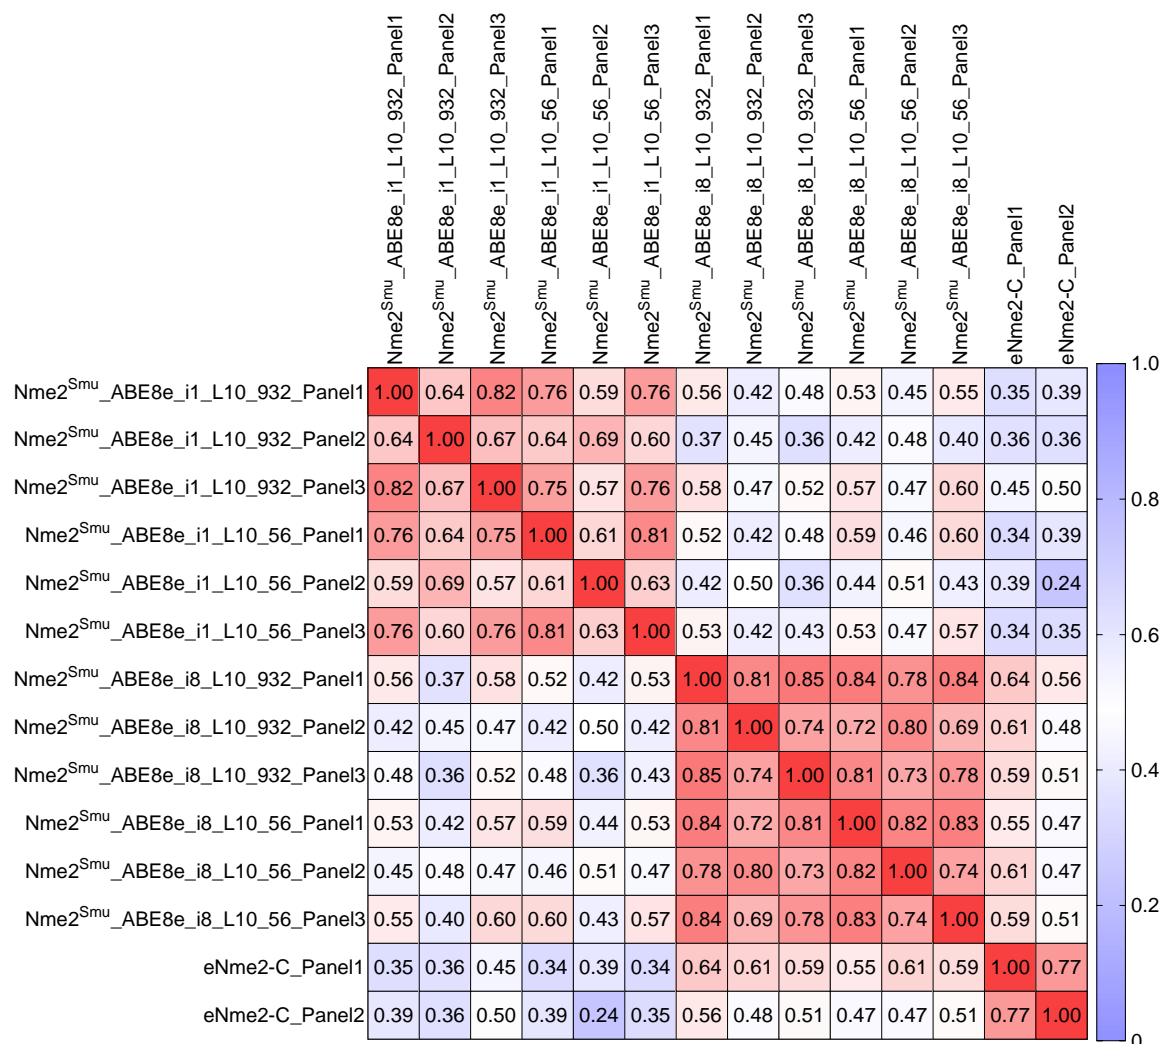

b.

| <b>ABE panels 1 vs. 2 vs. 3</b>           | <b>Pearson <i>r</i></b> |                     |                     | <b>p value</b>      |                     |                     |
|-------------------------------------------|-------------------------|---------------------|---------------------|---------------------|---------------------|---------------------|
| <b>Sample</b>                             | <b>Panel1 vs 2</b>      | <b>Panel1 vs 3</b>  | <b>Panel2 vs 3</b>  | <b>Panel 1 vs 2</b> | <b>Panel 1 vs 3</b> | <b>Panel 2 vs 3</b> |
| Nme2 <sup>Smu</sup> _ABE8e_i1_L10 (E932R) | 0.645                   | 0.824               | 0.670               | 7.217E-23           | 1.696E-46           | 3.378E-25           |
| Nme2 <sup>Smu</sup> _ABE8e_i1_L10 (D56R)  | 0.607                   | 0.808               | 0.627               | 8.391E-20           | 1.745E-43           | 2.215E-21           |
| Nme2_ABE8e_i8_L10 (E932R)                 | 0.809                   | 0.851               | 0.744               | 1.276E-43           | 1.840E-52           | 1.399E-33           |
| Nme2_ABE8e_i8_L10 (D56R)                  | 0.822                   | 0.833               | 0.742               | 4.906E-46           | 2.162E-48           | 3.106E-33           |
| eNme2.C_ABE8e                             | 0.766                   | n/a                 | n/a                 | 1.518E-36           | n/a                 | n/a                 |
|                                           |                         |                     |                     |                     |                     |                     |
|                                           | <b>CI</b>               |                     |                     | <b><i>n</i></b>     |                     |                     |
| <b>Sample</b>                             | <b>Panel 1 vs 2</b>     | <b>Panel 1 vs 3</b> | <b>Panel 2 vs 3</b> | <b>Panel 1 vs 2</b> | <b>Panel 1 vs 3</b> | <b>Panel 2 vs 3</b> |
| Nme2 <sup>Smu</sup> _ABE8e_i1_L10 (E932R) | 0.5510 to 0.7221        | 0.7709 to 0.8655    | 0.5814 to 0.7428    | 183                 | 183                 | 183                 |
| Nme2 <sup>Smu</sup> _ABE8e_i1_L10 (D56R)  | 0.5065 to 0.6912        | 0.7512 to 0.8532    | 0.5301 to 0.7077    | 183                 | 183                 | 183                 |
| Nme2_ABE8e_i8_L10 (E932R)                 | 0.7521 to 0.8538        | 0.8051 to 0.8865    | 0.6720 to 0.8028    | 183                 | 183                 | 183                 |
| Nme2_ABE8e_i8_L10 (D56R)                  | 0.7680 to 0.8637        | 0.7824 to 0.8726    | 0.6687 to 0.8007    | 183                 | 183                 | 183                 |
| eNme2.C_ABE8e                             | 0.6983 to 0.8198        | n/a                 | n/a                 | 183                 | n/a                 | n/a                 |

**Supplementary Figure 14. Guide-target quality control for ABE editing panels.** (a) Pearson correlation between experimental panels of Nme2<sup>Smu</sup>-ABE8e and eNme2-C effectors for the guide-target library experiments, comparing the mean editing rates across the adenines of a library member target site. Each experimental panel consisted of 3 biological replicates (Rep1, 2 or 3) compiled from **Figure 3c** (panel 1), **Supplementary Figure 10** (panel 2), and **Supplementary Figure 9** (panel 3). (b) Summary statistics for data in (a); CI indicates confidence interval, and *n* indicates number of comparisons.

| AA Mutation Location and Identity in nuclease | Codon Usage | Nucleic Acid Proximity in Homology Model | Domain                      | Note                                      |
|-----------------------------------------------|-------------|------------------------------------------|-----------------------------|-------------------------------------------|
| D56R                                          | CGT         | sgRNA                                    | Nme2 - Bridge Helix         |                                           |
| E186R                                         | CGT         | sgRNA                                    | Nme2 - REC1                 |                                           |
| D597R                                         | CGT         | sgRNA                                    | Nme2 -HNH                   |                                           |
| D598R                                         | CGT         | sgRNA                                    | Nme2 -HNH                   |                                           |
| D669R                                         | CGT         | sgRNA                                    | Nme2 - RuvC III             |                                           |
| E885R                                         | CGT         | sgRNA                                    | Nme2 - WEDGE                |                                           |
| E887R                                         | CGT         | sgRNA                                    | Nme2 - WEDGE                |                                           |
| E1079R                                        | CGT         | sgRNA                                    | Nme2 <sup>Smu</sup> - PID   | Specific to Nme2 <sup>Smu</sup> Effectors |
| T72Y                                          | TAT         | sgRNA                                    | Nme2 - Bridge Helix         |                                           |
| E50R                                          | CGT         | non-target DNA                           | Nme2 - RuvC I               |                                           |
| D658R                                         | CGT         | non-target DNA                           | Nme2 -Linker II             |                                           |
| E659R                                         | CGT         | non-target DNA                           | Nme2 -Linker II             |                                           |
| D660R                                         | CGT         | non-target DNA                           | Nme2 -Linker II             |                                           |
| E932R                                         | CGT         | non-target DNA                           | Nme2 - WEDGE                |                                           |
| E989R                                         | CGT         | target & non-target DNA                  | Nme2 <sup>Smu</sup> - WEDGE |                                           |
| D1048R                                        | CGT         | target & non-target DNA                  | Nme2 <sup>Smu</sup> - PID   | Specific to Nme2 <sup>Smu</sup> Effectors |
| D418R                                         | CGT         | Target DNA                               | Nme2 - REC1                 |                                           |
| D442R                                         | CGT         | Target DNA                               | Nme2 - REC1                 |                                           |
| E443R                                         | CGT         | Target DNA                               | Nme2 - REC1                 |                                           |
| D451R                                         | CGT         | Target DNA                               | Nme2 - REC1                 |                                           |
| D470R                                         | CGT         | Target DNA                               | Nme2 - RuvC II              |                                           |
| E471R                                         | CGT         | Target DNA                               | Nme2 - RuvC II              |                                           |
| E508R                                         | CGT         | Target DNA                               | Nme2 - RuvC II              |                                           |
| E520R                                         | CGT         | Target DNA                               | Nme2 -Linker I              |                                           |
| E524R                                         | CGT         | Target DNA                               | Nme2 -Linker I              |                                           |
| E552R                                         | CGT         | Target DNA                               | Nme2 -HNH                   |                                           |
| E585R                                         | CGT         | Target DNA                               | Nme2 -HNH                   |                                           |
| E587R                                         | CGT         | Target DNA                               | Nme2 -HNH                   |                                           |
| E844R                                         | CGT         | Target DNA                               | Nme2 - WEDGE                |                                           |
| E868R                                         | CGT         | Target DNA                               | Nme2 - WEDGE                |                                           |
| E873R                                         | CGT         | Target DNA                               | Nme2 - WEDGE                |                                           |
| D947R                                         | CGT         | Target DNA                               | Nme2 <sup>Smu</sup> - PID   | Specific to Nme2 <sup>Smu</sup> Effectors |
| A987R                                         | CGT         | Target DNA                               | Nme2 <sup>Smu</sup> - PID   | Equivalent to D987 in Nme2                |

Supplementary Table 1. Amino acid substitutions of Nme2Cas9 and Nme2<sup>Smu</sup>Cas9 arginine mutants

| eNme2-C | eNme2-C_NR | iNme2 |
|---------|------------|-------|
| P6S     |            | D844G |
| E33G    |            | E868K |
| K104T   | K104T      | K870R |
| D152A   | D152A      | D873A |
| F260L   | F260L      | D911G |
| A263T   | A263T      | K929R |
| A303S   | A303S      | E932K |
| D451V   | D451V      |       |
| E520A   |            |       |
| R646S   |            |       |
| F696V   |            |       |
| G711R   |            |       |
| I758V   |            |       |
| H767Y   |            |       |
| E932K   | E932K      |       |
| N1031S  | N1031S     |       |
| R1033G  | R1033G     |       |
| K1044R  | K1044R     |       |
| Q1047R  | Q1047R     |       |
| V1056A  | V1056A     |       |

**Supplementary Table 2. Amino acid substitutions present within previously published PAM-relaxed Nme2Cas9 variants.** Black-highlighted amino acid mutations are unique to specific Nme2Cas9 variants, while red-highlighted mutations indicate overlapping positions between previously characterized mutations and/or the Nme2Cas9 arginine variants described in this study.



**Supplementary Note 1.** Nucleotide sequence of key nuclease and base editing constructs described in this manuscript

**Nme2Cas9 (WT):** [BPSV40-NLS](#), [Nme2Cas9\\_Linkers](#)

[MKRTADGSEFESPKKKRKV](#)[EDMAAFKPNP](#)[INYLGLDIGIASV](#)[GWAMVEIDEEENPIRLIDL](#)[GVRVFERAEV](#)[PKTGDSLAMARRLARSVRR](#)  
[LTRRRRAHRLLRARRLLKREGVLQAADFDENGLIKSLPNTWQLRAAALDRKLT](#)[PLEWSAVLLHLIKHRGYSQRKNEGETADKELGALLKG](#)  
[VANNAHALQTGDFRTPAELALNKFEKESGHIRNQ](#)[RGDYSHTFSRKDLQAEILLFEKQKEFGNPHV](#)[SGGLKEGIELLMTQRPALSGDAV](#)  
[QKMLGHCTFEPAPKAANKNTYTAERFIWLT](#)[KLNLRILEQGSERPLDTERATLMDEPYR](#)[KSKLTYAQARKLLGLEDTAFFKGLRYGKDNA](#)  
[EASTLMEMKAYHAISRALEKEGLKDKSPLNLSSELQDEIGTAFSLFKTDEDITGRLKDRVQ](#)[PEILEALLKHISFDKFVQISLKALRRIVPLMEQ](#)  
[GKRYDEACAEIYGDHYGKKNTEEKIYLPPIPADEIRNPV](#)[LRLALSQARKVINGVRRYGPARIHIETAREV](#)[GKSFKDRKEIEKRQEENRKDR](#)  
[EKAAAKFREYFPNFVGEPSKIDILRLRYEQQH](#)[GKCLYSYGKEINLVRLEKGYVEIDHALP](#)[SRTWDDSFNNKVLVLGSENQNKGNQTPYE](#)  
[YFNGKDNSREWQEFKARVETSRFPRSKQRILLQ](#)[KFDEDFKECNLNDTRYVNRFLCQFVADHILL](#)[TGKGRRVFASNGQITNLLRGFWG](#)  
[LRKVRANDRHHALDAVVVACSTVAMQQKITR](#)[FVRYKEMNAFDGKTIDKETGKVLHQKTHF](#)[PQPWEFFAQEVMIRVFGKPDGKPEFEE](#)  
[ADTPEKLRLLAEKLSSRPEAVHEYVTPLFV](#)[SRAPNRKMSGAHKDTLRSARFVKHNEKISV](#)[KRVWLTEIKLADLENMVNYKNGREIELYEA](#)  
[LKARLEAYGGNAKQAFDPKDNPFYKGGQLV](#)[KAVRVEKTQESGVLLNKNAYTIADNGDM](#)[VRVDVFCVKDKGKNQYFIVPIYAWQVA](#)  
[ENILPDIDCKGYRIDDSYTFCSLHKYDLIAF](#)[QKDEKSKVEFAYYINCDSSNGRFLAWHD](#)[KGSKEQQFRISTQNLVLIQKYQVNELGKEIRP](#)  
[RLKKRPPVREDKRTADGSEFESPKKKRKV](#)

[Atgaaacggacagccgacggaagcgagttc](#)[gagtcaccaagaagaagc](#)[ggaagtcgaagat](#)[atggccgcttcaagccta](#)[accatcaattacatcctgggactgga](#)  
[catcgaatcgatcctgggatgggctatggtggagat](#)[cgacagaggagagaatcctatccggctgat](#)[cgcctgctgctgggctgagagtggttgagagggc](#)[caggtgccaag](#)  
[accggcgattcctggctatgcccggagactggc](#)[cagcgtgagggcctgacacggagaaggcaca](#)[caggctgctgagggcagccggctgctgaagagaggg](#)  
[cgtgctgcagggcagagacttcgatgagaatggc](#)[ctgatcaagagcctgccaacaccccctggcag](#)[ctgagagcagcccccggacaggaagctgacacc](#)[actggagtg](#)  
[gtctgccgtgctgctgacactgatcaagcaccg](#)[cggtacctgagccagcgaagaacgagggagag](#)[acagagcagacaaggagctgggcccctgctga](#)[agggagtgcca](#)  
[acaatgcccacgcccctgcagaccggcgattt](#)[caggacacctgcccagctggccctgaataagt](#)[ttgagaaggagtcggccacatcagaaaccag](#)[agggcgactatagcc](#)  
[acaccttctcccgaaggatctgcagggcgagct](#)[gatcctgctgttcgagaagcagaaggagttt](#)[gccaatccacacgtgagcggaggcctgaagg](#)[aggaatcgagaccct](#)  
[gctgatgacacagaggcctgcctgtccggcgac](#)[gcagtcagaagatgctgggacactgcacctt](#)[cgacctgcagagc](#)[caaggccgccaagaacaccta](#)[cacagccga](#)  
[cggtttatctggctgacaaagctgaacaatct](#)[gagaatcctggagcagggatccgagaggcc](#)[actgaccgacacagagagggccacccctgat](#)[gatgagccttaccgga](#)  
[gtctaagctgacatgcccaggccagaaagct](#)[gctggcctggaggacaccgcttcttaagg](#)[cctgagatacggcaaggataatgccaggc](#)[ctccacactgatggag](#)  
[atgaagcctatcacgcatctctcgcccctg](#)[gagaaggagggcctgaaggacaagaagt](#)[ccccctgaacctgagctcggagctgag](#)[gatcgccaccgcttct](#)  
[ctctgttaagaccgacgagatcacaggccg](#)[cctgaaggacagggctgagcctgagatcct](#)[gagccctgctgaagcacatctttcgata](#)[agttgtgagatcagc](#)  
[ctgaaggccctgagaaggatctgcccact](#)[gatggagcagggcaagcggtacgacgag](#)[cctgcgagatctacggcgatcactatgg](#)[caagaagaacacagaggaga](#)  
[agatctatctgcccctatccctgcccagag](#)[atcagaaatcctgtggtgctgagggcct](#)[gtcccaggcaagaaagtgatcaacggag](#)[tggtgcccggtaggatcca](#)  
[gcccggatccacatcgagaccgccaagaga](#)[agtgaggcaagagctcaaggaccggaag](#)[gagatcgagaagagacaggaggagaat](#)[cgaaagatcgggagaagccgc](#)  
[gccaagtttagggagtaacttccctaact](#)[ttgtggcgagccaaagtctaaggacat](#)[cctgaagctgcgctgtacgacgagcag](#)[cagcagcagcagcagcagcagcagcagc](#)  
[agatcaatctggtgctgaacgagaaggct](#)[atgtggagatgatcacgcccctgctt](#)[ctccagaacctgggacgattctt](#)[taacaataagtgctggtgctggcagc](#)  
[agaaccagaataaggcgaatcagacaccata](#)[cagatattcaatggaaggacaactccag](#)[ggagtgagcaggttcaaggcccgtg](#)[gagaccttagatttccagga](#)  
[gcaagaagcagcggatcctgctgcagaagt](#)[tcgacgaggtgctttaggagtgcaac](#)[tgaatgacaccagatacgtgaaccg](#)[gttctgtgccaagttgtgcca](#)  
[gatcctgctgaccggcaagggaagagaagg](#)[gttgcctctaagccagatcacaaa](#)[cctgctgaggggatttggggact](#)[gaggaaggtgcccagagaa](#)  
[tgcagacacaccacgactggatgagtggt](#)[ggcagcagcagcagcagcagcagcagc](#)  
[agatcacaagattcgtgaggtataaggag](#)[atgaacgcttgcagcagacat](#)  
[cgataaggagacaggcaaggtgctgaccaga](#)[agaccactccccagcctgggagttct](#)[tggccaggaaagtgatgatccgggt](#)  
[gttcggcaagccagacggcaagcct](#)  
[gagttgaggaggccgatacccagagaag](#)[ctgaggacactgctggcagagaag](#)  
[ctgctagcaggccagagcagtcacgag](#)  
[tactgaccccactgttctgtccagg](#)  
[gcaccaatcggaagatgtctggc](#)  
[cccacaaggacactgagaagc](#)  
[ccaagaggttgaagcacaacgaga](#)  
[agatctccgtgaagagagtggtg](#)  
[ctgaccgagat](#)  
[caagctggccgatctggagaacatggt](#)  
[gaattacaagaacggcagggagat](#)  
[cgactgataggccctgaaggcaag](#)  
[ctgagggcctacggaggaaatgcca](#)  
[agcagccttgcacccaaagata](#)  
[accctttataagaaggaggacag](#)  
[ctggtgaagccctgcccgtg](#)  
[ggaggagaagaccaggagagc](#)  
[gctgctgctgtaataagaagaac](#)  
[gcc](#)  
[tacacaatcgccgacaatggcgata](#)  
[tggtgagagtgagctgttctg](#)  
[taaggtgataagaagggaagaat](#)  
[cagtactttatctgtcctatctat](#)  
[gctggcaggtggccga](#)  
[gaacatcctgccaagacatgatt](#)  
[gcaagggctacagaatgcagatag](#)  
[ctatacattctgttttccctg](#)  
[cacaagtagacctgatgcctt](#)  
[cagaagatgagaagtc](#)  
[aatggtggagttgctactatata](#)  
[atgagcactctaacggcaggtt](#)  
[ctacctggcctggcagataagg](#)  
[cagcaaggagcagcagttc](#)  
[gcatctccaccagaatctgt](#)  
[gctgatccagaagtatcaggt](#)  
[gaacagctgggcaaggagat](#)  
[caggccatgctggctgaagaag](#)  
[cgcccaccgtgcccggaggat](#)  
[aaaagaaccggcagcagcga](#)  
[ttcgagccaagaagaaggaaagtc](#)

**Nme2Cas9 (E932R):** [BPSV40-NLS](#), [Nme2Cas9\\_Linkers](#)

[MKRTADGSEFESPKKKRKV](#)[EDMAAFKPNPINYILGLDIGIASVGWAMVEIDEEENPIRLIDLGVRFERAEVPKTGDSLAMARRLARSVRR](#)  
[LTRRRRAHRLLRARRLLKREGVLQAADFENGLIKSLPNTPWQLRAAALDRKLTPLEWSAVLLHLIKHRGYSQRKNEGETADKELGALLKG](#)  
[VANNAHALQTGDFRTPAELALNKFEKESGHIRNQRGDYSHTFSRKDLQAEILLLFEKQKEFGNPHVSGGLKEGIETLLMTQRPALSGDAV](#)  
[QKMLGHCTFEPAPKAANKNTYTAERFIWLTKLNNLRILEQGSERPLDTERATLMDEPYRKSCLTYAQARKLLGLEDTAFFKGLRYGKDNA](#)  
[EASTLMEMKAYHAISRALEKEGLKDKKSPLNLSSELQDEIGTAFSLFKTDEDITGRLKDRVQPEILEALLKHISFDKFVQISLKALRRIVPLMEQ](#)  
[GKRYDEACAEIYGDHYGKKNTEEKIYLPPIPADEIRNPVLRALSQARKVINGVRRYGSARIHIETAREVKGSKFKDRKEIKRQEENRKDR](#)  
[EKAAAKFREYFPNFVGEPSKIDILRLRYEQQHKGCLYSGKEINLVRLENEKGYVEIDHALPFSRTWDDSFNNKVLVLGSENQKGNQTPYE](#)  
[YFNGKDNSREWQEFKARVETSRFPRSKQRILLQKFDEDGFKECNLNDTRYVNRFLCQFVADHILLTGKGRRVFASNGQITNLLRGFWG](#)  
[LRKVRAENDRHHALDAVVVACSTVAMQQKITRFVRYKEMNAFDGKTIDKETGKVLHQKTHFPQPWEFFAQEVMIRVFGKPDGKPEFEE](#)  
[ADTPEKLRLLAEKSSRPEAVHEYVTPLFVSRAPNRKMSGAHKDTLRSARFVKHNEKISVKRVWLTEIKLADLENMVNYKNGREIELYEA](#)  
[LKARLEAYGGNAKQAFDPKDNPFYKGGQLVKAVRVEKTQR](#)[RSGVLLNKNAYTIADNGDMVRVDVFCVKVDKKGKNQYFIVPIYAWQVA](#)  
[ENILPDIDCKGYRIDDSYTFCSLHKYDLIAFQKDEKSKVEFAYYINCDSSNGRFLAWHDKGSKEQQFRISTQNLVLIQKYQVNELGKEIRPC](#)  
[RLKKRPPVRE](#)[DKRTADGSEFEPKKRKV](#)

[Atgaaacggacagccgacggaagcgagttcgagtcaccaagaagaagcgaaagtcgaagat](#)[atggccgcttcaagcctaaccaatcaattacatcctgggactgga](#)  
[catcggaatcgatccgtgggatgggctatggtggagatcgacgaggaggagaatcctatccggctgatcgatctggcgtgagagtggttagagggccgaggtgccaag](#)  
[accggcgattctctggctatggccggagactggcaccggagcgtgaggcgctgacacggagaagggcacacaggctgctgagggcagccggctgctgaagagagaggg](#)  
[cgtgctgcaggcagcagacttcgatgagaatggcctgatcaagagcctgccaacaccccctggcagctgagagcagccgccctggacaggaagctgacaccactggagtg](#)  
[gtctgccgtgctgctgacactgatcaagcaccgctacctgagccagcgaagaacgaggagagacagcagacaaggagctgggcgccctgctgaagggagtgcca](#)  
[acaatgcccagccctgcagaccggcgattcaggacacctgcccagctggcctgaataagttgagaaggagtcggccacatcagaaaccagagggggcactatagcc](#)  
[acaccttctcccgaaggatctgcaggcagctgatcctgctgttcgagaagcagaaggagttggcaatccacacgtgagcggaggcctgaaggagggaatcgagaccct](#)  
[gctgatgacagaggcctgccctgtccggcgacgcagtgagaagatgctgggacactgcaccttcgagcctgcagagccaaggccgcaagaacacctacacagccga](#)  
[cgggttatctggctgacaaagctgaacaatctgagaatctggagcagggatccgagaggccactgaccgacacagagagggccacccctgatggatgagccttaccgaa](#)  
[gtctaagctgacatatgccaggccagaaagctgctggcctggaggacaccgccttcttaagggcctgagatacggcaaggataatgccaggcctccacactgatggag](#)  
[atgaaggcctatcacgcatctctgcgccctggagaaggaggcctgaaggacaagaagtcctcctgaacctgagctccgagctgcaggatgagatcggcaccgccttct](#)  
[ctctgttaagaccgacgaggatcacaggccgctgaaggacagggctgagcctgagatctggaggccctgctgaagcacatcttctgataagttgtgagatcagc](#)  
[ctgaaggccctgagaaggatcgtgccactgatggagcaggcgaagcgttacgacgaggcctgcgagatctacggcagatcactatggcaagaagaacacagaggaga](#)  
[agatctatctgcccctatccctgccgacgagatcagaaatcctgtggtgctgagggcctgtcccaggcaagaaagtgatcaacggagtggtgcgccgtacggatctcca](#)  
[gcccggatccacatcgagaccgccaagagaagtgaggcaagagctcaaggaccggaaggagatcgagaagagacaggaggagaatcgcaaggatcgggagaagggccg](#)  
[gccaagtttagggagtaactccctaactttgtggcgagcaaaagctcaaggacatcctgaagctgcgctgtacgagcagcagcagcagcagcagcagcagcagcagc](#)  
[agatcaatctggtgcggtgaacgagaaggctatgtggagatcgatcacgccctgccttctccagaacctgggacgattctttaaacaataagtgctggtgctggcgagc](#)  
[agaaccagaataagggaatcagacaccatacagatattcaatggcaaggacaactccaggagtgaggagttcaaggcccgctggagaccttagatttcccagga](#)  
[gcaagaagcagcggatcctgctgcagaagttcgacgaggatggcttaaggagtgcaacctgaatgacaccagatacgtgaaccggttctgtgccagttgtggcctca](#)  
[catcctgctgaccggcaagggaagagaagggttgcctctaagggcagatcacaacctgctgaggggatttggggactgaggaaggtgcggcagagaatgacag](#)  
[acaccacgactggatgagtggtggtgcatgacaccgtggcaatgcagcagaagatcacaagattcgtgaggtataaggagatgaaccctttgacggcaagacct](#)  
[cgataaggagacaggcaaggtgctgcaccagaagaccacttccccagccttgggagttcttggccaggaaagtgatgatccgggttctggcaagccagacggcaagcct](#)  
[gagtttagggaggccgataccccagagaagctgaggacactgctggcagagaagctgtctagcaggccagaggcagtgacagtagctgacccactgttctgtccagg](#)  
[gcaccaatcggaaagatgtctggcggccacaaggacacactgagaagcgcaagagtttgaagcacaacgagaagatctccgtgaagagagtggtgctgaccgagat](#)  
[caagctggccgatctggagaacatggtgaattacaagaacggcaggagatcgagctgtatgaggcctgaaggcaaggctggaggcctacggaggaaatgccaagcagg](#)  
[ccttgacccaaaggataacccctttataagaaggaggacagctggtgaaggccgtgcccgtggagaagaccag](#)[CGT](#)[agcggcgtgctgctgaataagaagaacgc](#)  
[tacacaatcggcaatggcgataggtgagagtgagctgttctgaaggtggataagaagggaagaatcagtagcttctatctgctatctatcctggcaggtggccga](#)  
[gaacatcctccagacatcgattgaaggctacagaatcgacgatagctatacattctgttttccctgcacaagatgacctgatccttcagaaggatgagaagtcca](#)  
[ggtggagttgctactatatacaattgcgactccttaacggcaggttctacctggcctggcagcagataaggcagcaaggagcagcagtttgcgactctccaccagaatctggt](#)  
[gctgatccagaagatcaggtgaacgagctgggcaaggagatcaggccatgctggctgaagaagcgccaccctgctgggagga](#)[ataaagaaccggcagcagcga](#)  
[ttcgagccaagaagaagaggaaagtc](#)

**Nme2Cas9 (D56R):** [BPSV40-NLS](#), [Nme2Cas9\\_Linkers](#)

[MKRTADGSEFESPKKKRKV](#)[EDMAAFKPNPINYILGLDIGIASVGWAMVEIDEEENPIRLIDLGVRVFERAEVPKTGR](#)[SLAMARRLARSVRR](#)  
[LTRRRRAHRLLRARRLLKREGVLQAADFENGLIKSLPNTWQLRAAALDRKLTPLEWSAVLLHLIKHRGYSQRKNEGETADKELGALLKG](#)  
[VANNAHALQTGDFRTPAELALNKFEKESGHIRNQRGDYSHTFSRKDLQAEILLFEKQKEFGNPHVSGGLKEGIETLLMTQRPALSGDAV](#)  
[QKMLGHCTFEPAPKAANKNTYTAERFIWLTKLNNLRILEQGSERPLDTERATLMDEPYRKSCLTYAQARKLLGLEDTAFFKGLRYGKDNA](#)  
[EASTLMEMKAYHAISRALEKEGLKDKKSPLNLSSELQDEIGTAFSLFKTDEDITGRLKDRVQPEILEALLKHISFDKFVQISLKALRRIVPLMEQ](#)  
[GKRYDEACAEIYGDHYGKKNTEEKIYLPPIPADEIRNPVLRALSQARKVINGVRRYGSARIHIETAREVKGSKFKDRKEIKRQEENRKDR](#)  
[EKAAAKFREYFPNFVGEPSKIDILRLRYEQQHKGCLYSGKEINLVRLENEKGYVEIDHALPFSRTWDDSFNNKVLVLGSENQKGNQTPYE](#)  
[YFNGKDNSREWQEFKARVETSRFPRSKQRILLQKFDEDGFKECNLNDTRYVNRFLCQFVADHILLTGKGRRVFASNGQITNLLRGFWG](#)  
[LRKVRAENDRHHALDAVVVACSTVAMQQKITRFVRYKEMNAFDGKTIDKETGKVLHQKTHFPQPWEFFAQEVMIRVFGKPDGKPEFEE](#)  
[ADTPEKLRLLAEKSSRPEAVHEYVTPLFVSRAPNRKMSGAHKDTLRSARFVKHNEKISVKRVWLTEIKLADLENMVNYKNGREIELYEA](#)  
[LKARLEAYGGNAKQAFDPKDNPFYKGGQLVKAVRVEKTQESGVLLNKNAYTIADNGDMVRVDVFCVKDKGKNQYFIVPIYAWQVA](#)  
[ENILPDIDCKGYRIDDSYTFCSLHKYDLIAFQKDEKSKVEFAYYINCDSSNGRFLAWHDKGSKEQQFRISTQNLVLIQKYQVNELGKEIRPC](#)  
[RLKKRPPVRE](#)[DKRTADGSEFEPKKRKV](#)

[Atgaaacgacagccgacggaagcgagttcgagtcaccaagaagaagcgaaagtcgaagat](#)[atggcgcctcaagcctaaccaatcaattacatcctgggactgga](#)  
[catcggaaatcgatccgtgggatgggctatggtggagatcgacgaggaggagaatcctatccggctgatcgatctggcgtgagagtggttgagagggccgaggtgccaag](#)  
[accggc](#)[CGT](#)[tctctggctatggcccgagactggcagcgagcgtgagggcctgacacggagaagggcacacaggtcgtgagggcacgcccgtgtaagagagagg](#)  
[gctgctgacggcagcagacttctgatgagaatggcctgatcaagagcctgccaacaccccctggcagctgagagcagcccccctggacaggaagctgacaccactggag](#)  
[ggtctgccgtgctgctcacctgatcaagcaccgagcctacctgagccagcgaagaacgaggagagacagcagacaaggagctggggcgcctgctgaagggagtgcc](#)  
[aacaatgccacgcccctgacagccggcatttcaggacacctgcccagctggcctgaataagtttgagaaggagtcggccacatcagaaaccagagggggcactatagc](#)  
[cacaccttctcccgaaggatctgacggcagctgatcctgctgttcgagaagcagaaggagttggcaatccacacgtgagcggaggcctgaaggagggaatcgagacc](#)  
[ctgctgatgacacagggcctgcctgtccggcagcagctgcagaagatgctgggacactgcacctcgagcctgacagcacaagggccgaagaacacctacacagcc](#)  
[gagcggtttatctggctgacaaaagctgaacaatctgagaatcctggagcagggatccgagaggccactgaccgacacagagagggccacccctgatggatgagcctaccgg](#)  
[aagtctaagctgacatattcccagggcagaagagctgctggcctggaggacaccgcttcttaagggcctgagatacggcaaggataatcggaggcctccacactgatgg](#)  
[agatgaagcctatcacgcatctctcgccttgagaagggagggcctgaaggacaagaagtcctccctgaacctgagctccgagctcagggatgagatcggcaccgctt](#)  
[ctctctgttaagaccgacgagatcacagggcgcctgaaggacagggcagcctgagatcctggaggcctgctgaagcacatctcttcgataagtttgagatgag](#)  
[cctgaaggcctgagaaggatcgtgccactgatggagcagggcaagcggtacgacgaggcctgcccagatctacggcgtacatattggcaagaagaacacagaggag](#)  
[aagatctatctccccctatccctgcccagagatcagaaaatcctgtggtgctgagggcctgtcccaggcaagaaaagtgatcaacggagtggtgctgcccggatcctc](#)  
[agcccgatccacatcgagaccgccaagagaagtgggcaagagctcaaggaccggaaggagatcgagaagagacagggaggagaatcgcaaggatcgggagaagggccc](#)  
[cgccaagtttagggagtacttcctaactttgtggcgagccaaagttaaggacatcctgaagctgcccgtgacgagcagcagcagcgaagtgctgtatagcgcaagg](#)  
[agatcaatctggtgctggaacgagaagggctatgtggagatgatcacgcccctgcttctccagaacctgggacgattctttaaacaataagtgctggtgctggcagcg](#)  
[agaaccagaataagggcaatcagacaccatacagatttcaatggcaaggacaactccaggagtgagcaggagttcaaggcccgtgagacacttagatttcccagga](#)  
[gcaagaagcagcggatcctgctgcagaagttcgacgaggatggcttaaggagtgcaacctgaatgacaccagatacgtgaaccggttctgtgccaagttgtggcgtca](#)  
[catcctgctgaccggcaagggcaagagaaggggttcgctcctaatggccagatcacaacctgctgaggggattttggggactgaggaaggtgcccagagaaatgacag](#)  
[acaccacgactggatgagtggtggtgcatgacgaccgtggcaatgacgagaagatcacaagattcgtgaggtataaggagatgaaccgctttgacggcaagacct](#)  
[cgataaggagacaggcaaggtgctgaccagaagaccacttccccagccttgggagttcttggccaggaagtgatgatccgggtgttcggcaagccagacggcaagcct](#)  
[gagtttgaggaggccgataccccagagaagctgaggacactgctggcagagaagctgtctagcaggccagaggcagtgacgagtagctgaccccactgttctgtccagg](#)  
[gcaccaatcggaagatgtctggcggccacaaggacacactgagaagcgccaagaggtttggaagcacaacgagaagatctccgtgaagagagtggtgctgaccgagat](#)  
[caagctggccgatctggagaacatggtgaattacaagaacggcagggagatcgagctgtatgaggcctgaaggcaagctggaggcctacggaggaaatgccaagcagg](#)  
[ccttgacccaaaaggataacccctttataagaagggaggacagctggtgaagccgtgcccgtgggagagaccagagagcggcgtgctgctgtaataagaagaacgcc](#)  
[tacacaatcgccgacaatggcgatagtgagagtgagctgttctgtaaggtggataagaagggcaagaatcagactttatctgtcctatctatgctggcaggtggccga](#)  
[gaacatcctgccagacatgattgcaagggctacagaatcgacgatagctataactctgttttccctgcacaagatgacctgatccttcagaaggatgagaagtcca](#)  
[ggtggagttgctactatatacaattgagactccttaacggcaggttctacctggcctggcagcagataagggcagcaaggagcagcagtttgcgactctccaccagaatctggt](#)  
[gctgatccagaagatcaggtgaacgagctgggcaaggagatcaggccatgctggctgaagaagcgcccaccctgctgggagga](#)[ataaagaaccgcccagcagcgaa](#)  
[ttcgagccaagaagaagaggaagtc](#)

Nme2<sup>Smu</sup>Cas9 (WT): [BPSV40-NLS](#), Nme2Cas9 – delta PID, [SmuCas9 PID](#), Linkers

[MKRTADGSEFESPKKKRKV](#)[EDMAAFKPNPINYILGLDIGIASVGMVEIDEEENPIRLIDLGVRFERAEVPKTGDSLAMARRLARSVRR](#)  
[LTRRRRAHRLLRARRLLKREGVLQAADFENGLIKSLPNTWQLRAAALDRKLTPLEWSAVLLHLIKHRGYSQRKNEGETADKELGALLKG](#)  
[VANNAHALQTGDFRTPAELALNKFEKESGHIRNQRGDYSHTFSRKDLQAEILLLFEKQKEFGNPHVSGGLKEGIELLLMTQRPALSGDAV](#)  
[QKMLGHCTFEPAPKAANKNTYTAERFIWLTKLNNLRILEQGSERPLDTERATLMDEPYRKSCLTYAQARKLLGLEDTAFFKGLRYGKDNA](#)  
[EASTLMEMKAYHAISRALEKEGLKDKKSPLNLSSELQDEIGTAFSLFKTDEDITGRLKDRVQPEILEALLKHISFDKFVQISLKALRRIVPLMEQ](#)  
[GKRYDEACAEIYGDHYGKKNTEEKIYLPPIADEIRNPVLRALSQARKVINGVRRYVSPARIHIETAREVKGSKFKDRKEIEKRQEENRKDR](#)  
[EKAAAKFREYFPNFVGEPSKIDILRLRYEQQHKGCLYSKEINLVRLENEKGYVEIDHALPFSRTWDDSFNNKVLVLGSENQKGNQTPYE](#)  
[YFNGKDNSREWQEFKARVETSRFPRSKQRILLQKFDEDGFKECNLDTRYVNRFLCQFVADHILLTGKGRRVFASNGQITNLLRGFWG](#)  
[LRKVRAENDRHHALDAVVVACSTVAMQQKITRFVRYKEMNAFDGKTIDKETGKVLHQKTHFPQPWEFFAQEVMIRVFGKPDGKPEFEE](#)  
[ADTPEKLRLLAEKSSRPEAVHEYVTLFVSRAPNRKMSGAHKDTLRSARFVKHNEKISVKRVWLTEIKLADLENMVNYKNGREIELYEA](#)  
[LKARLEAYGGNAKQAFDPKDNPFYKGGQLVKAVRVEKTQESGVLLNKNAYTIANATMVRVDVYTKAGKNYLVVYVWQVAQGILP](#)  
[NRAVTSGKSEADWDLIDESFEFKLSRGLVEMISNKGRIFGYNGLDRANGSIGIREHDLEKSKGKGDVHRVGVKTATAFNKYHVDPLG](#)  
[KEIHRCSSEPRPTLKIKSKK](#)[EDKRTADGSEFESPKKKRKV](#)

[atgaaacggacagccgacggaagcaggttcgagtcaccaagaagaagcggaaagtcgaagat](#)[atggccgctcaagcctaaccaatcaattacatcctgggactgga](#)  
[catcggaaatcgatccgtgggatgggctatggtggagatcgacgaggaggagaatcctatccggctgatcgatctggcgctgagagtggttgagagggccgaggtgccaag](#)  
[accggcgattctctggctatggccggagactggcagcgagcgtgaggcgctgacacggagaagggcacacaggctgctgagggcagccggctgctgaagagagaggg](#)  
[cgtgctgcaggcagcagacttcgatgagaatggcctgatcaagagcctgccaacaccccctggcagctgagagcagcccccctggacaggaagctgacaccactggagtg](#)  
[gtctgcccgtgctgctgacactgatcaagcaccgctacctgagccagcgaagaacaggggagagacagcagacaaggagctgggcccctgctgaagggagtgcca](#)  
[acaatgcccacgcccctgcagaccggcgatttcaggacacctgcccagctggcctgaataagtttgagaaggagtcggccacatcagaaaccagagggggcactatagcc](#)  
[acaccttctcccgaaggatctgcaggcagctgatcctgctgttcgagaagcagaaggagtttgcaatccacacgtgagcggaggcctgaaggagggaatcgagaccct](#)  
[gctgatgacagaggcctgcccgtcggcgacgcagtgcaagaatgctgggacactgcaccttcgagcctgacagcgaagggccgcaagaacacctacacagccga](#)  
[cgggttatctggctgacaaagctgaacaatctgagaatctggagcagggatccgagaggccactgaccgacacagagagggccacccctgatggatgagccttaccggaa](#)  
[gtctaagctgacatgcccaggccagaaagctgctggcctggaggacaccgcttcttaagggcctgagatacggcaaggataatgccaggcctccacactgatggag](#)  
[atgaagcctatcacgcatctctcgccttgagaaggaggcctgaaggacaagaagccccctgaacctgagctccgagctgagggatgagatcggcaccgcttct](#)  
[ctctgttaagaccgacgagatcacaggccgctgaaggacagggctgagcctgagatctggaggccctgctgaagcacatcttctgataagttgtgagatcagc](#)  
[ctgaaggcctgagaaggatcgtgcccactgatggagcagggcaagcggctacgacgaggcctgcgagatctacggcctgactatggcaagaagaacacagaggaga](#)  
[agatctatctgcccctatccctgcccagagatcagaaatcctgtggtgctgagggcctgcccaggcaagaaaagtgatcaacggagtggtgcccggctacggatctcca](#)  
[gcccggatccacatcgagaccgccaagagaagtgaggcaagagctcaaggaccggaaggagatcagaagagacaggaggagaatcgcaaggatcgggagaagggccc](#)  
[gccaagtttagggagtaactccctaactttgtggcgagcaaaagctcaaggacatcctgaagctgcgctgtacgagcagcagcacggcaagtgctgtatagcggcaagg](#)  
[agatcaatctggtgcccgtgaacgagaagggctatgtggagatcgatcacgcccctgcttctccagaacctgggacgattctttaaacaataagtgctggtgctggcgagc](#)  
[agaaccagaataagggcaatcagacaccatacagatattcaatggcaaggacaactccaggagtgaggagttcaaggcccgtggagaccttagatttcccagga](#)  
[gcaagaagcagcggatcctgctgcagaagttcgacgaggatggcttaaggagtgcaacctgaatgacaccagatacgtgaaccggttctgtgcccagttgtggcctca](#)  
[catcctgctgaccggcaagggaagagaaggggttcgctcctaatggccagatcacaacctgctgaggggatttggggactgaggaaggtgcccagagagaatgacag](#)  
[acaccacgactggatgagtggtggtgcatgacacccgtggcaatgcagcagaagatcacaagattcgtgaggtataaggagatgaaccgctttgacggcaagacct](#)  
[cgataaggagacaggcaaggtgctgaccagaagaccacttccccagccttgggagttcttggccaggaaagtgatgatccgggttctggcaagccagacggcaagcct](#)  
[gagtttgaggaggccgataccccagagaagctgaggacactgctggcagagaagctgtctagcaggccagaggcagtgacgagtagctgaccccactgttctgtccagg](#)  
[gcaccaatcggaaagatgtctggcggccacaaggacacactgagaagcggcaagaggtttggaagcacaacgagaagatctcctgtaagagagtggtgctgaccgagat](#)  
[caagctggccgatctggagaacatggtgaattacaagaacggcagggagatcgagctgtatgagccctgaaggcaagctggaggcctacggaggaatgccaagcagg](#)  
[ccttgacccaaaaggataacccctttataagaagggaggacagctggtgaagggcctgcccgtgggagagaagaccaggagagcggcgtgctgctgaataagaagaagcc](#)  
[tacacaatcgccgacaacgccaccatggtgcccgtggactgtacaccaaggccggaagaactacctggttctgtgtacgtgtggcaggtggccaggggcatcttaccca](#)  
[accgcccgtgaccagcggcaagtcaggctgactgggacctgatcgatgagagcttcgagttcaagttctctctcccgggagatctctggaatgatctccaacaag](#)  
[ggcagaatcttggctactacaacggcctggacagagccaacggctctattggaatagagagcagcacttagagaagagcaagggcaagacggcgtgcatagagtggg](#)  
[agtgaaaacagctacagcatttaacaagtaaccctggatcccctgggcaagagatccacagatgcagcagcgaaccagacctactgaaaatcaagtctaagaag](#)  
[aggat](#)[aaaagaaccggcagcgaatcagcccaagaagaagaggaagtc](#)

Nme2<sup>Smu</sup>Cas9 (E932R): [BPSV40-NLS](#), [Nme2Cas9 – delta PID](#), [SmuCas9 PID](#), [Linkers](#)

[MKRTADGSEFESPKKKRKV](#)[EDMAAFKPNPINYILGLDIGIASVGMVEIDEEENPIRLIDLGVRFERAEVPKTGDSLAMARRLARSVRR](#)  
[LTRRRRAHRLLRARRLLKREGVLQAADFENGLIKSLPNTWQLRAAALDRKLTPELWSAVLLHLIKHRGYSQRKNEGETADKELGALLKG](#)  
[VANNAHALQTGDFRTPAELALNKFEKESGHIRNQRGDYSHTFSRKDLQAEILLFEKQKEFGNPHVSGGLKEGIETLLMTQRPALSGDAV](#)  
[QKMLGHCTFEPAPKAAKNTYTAERFIWLTCLNLRILEQGSERPLDTERATLMDEPYRKSCLTYAQARKLLGLEDTAFFKGLRYGKDNA](#)  
[EASTLMEMKAYHAISRALEKEGLKDKKSPLNLSSELQDEIGTAFSLFKTDEDITGRLKDRVQPEILEALLKHISFDKFVQISLKALRRIVPLMEQ](#)  
[GKRYDEACAEIYGDHYGKKNTEEKIYLPPIPADEIRNPVLRALSQARKVINGVRRYGSARIHIETAREVKGSKFKDRKEIKRQEENRKRDR](#)  
[EKAAAKFREYFPNFVGEPSKIDILRLRYEQQHKGCLYSKEINLVRLEKGYVEIDHALPFSRTWDDSFNNKVLVLGSENQKGNQTPYE](#)  
[YFNGKDNSREWQEFKARVETSRFPRSKQRILLQKFDEDGFKECNLNDTRYVNRFLCQFVADHILLTGKGRRVFASNGQITNLLRGFWG](#)  
[LRKVRAENDRHHALDAVVVACSTVAMQQKITRFVRYKEMNAFDGKTIDKETGKVLHQKTHFPQPWEFFAQEVMIRVFGKPDGKPEFEE](#)  
[ADTPEKLRLLAEKSSRPEAVHEYVTLFVSRAPNRKMSGAHKDTLRSARFVKHNEKISVKRVWLTEIKLADLENMVNYKNGREIELYEA](#)  
[LKARLEAYGGNAKQAFDPKDNPFYKGGQLVKAVRVEKTR](#)[RSGVLLNKNAYTIA](#)[DNATMVRVDVYTKAGKNYLVPVYVWQVAQGILP](#)  
[NRAVTSGKSEADWDLIDESFEFKLSRGLVEMISNKGRIFGYNGLDRANGSIGIREHDLEKSKGKDGVHRVGVKTATAFNKYHVDPLG](#)  
[KEIHRCSSEPRPTLKIKSKK](#)[EDKRTADGSEFEPKKRKV](#)

[atgaaacggacagccgacggaagcgagttcgagtcaccaagaagaagcggaaagtcgaagat](#)[atggccgcttcaagcctaaccaatcaattacatcctgggactgga](#)  
[catcggaaatcgatccgtgggatgggctatggtggagatcgacgaggaggagaatcctatccggctgatcgatctggcgtgagagtggttagagggccgaggtcctaaag](#)  
[accggcgattctctggctatggccggagactggcagcgagcgtgaggcgctgacacggagaagggcacacaggctgctgagggcagccggctgctgaagagagaggg](#)  
[cgtgctgcaggcagcagacttcgatgagaatggcctgatcaagagcctgcaaacaccccctggcagctgagagcagcccccctggacaggaagctgacaccactggagtg](#)  
[gtctgcccgtgctgctgacactgatcaagcaccgctacctgagccagcgaagaacagggagagacagcagacaaggagctgggcccctgctgaagggagtgccca](#)  
[acaatgcccagccctgcagaccggcgattcaggacacctgcccagctggccctgaataagttgagaaggagtcggccacatcagaaaccagagggggcactatagcc](#)  
[acaccttctcccgaaggatctgcaggcagctgatcctgctgttcgagaagcagaaggagtttgcaatccacacgtgagcggaggcctgaaggagggaatcgagaccct](#)  
[gctgatgacagaggcctgcccgtcggcgacgcagtgcaagaatgctgggacactgcaccttcgagcctgacagcctgcaagggccgcaagaacacctacacagccga](#)  
[cgggttatctggctgacaaagctgaacaatctgagaatctggagcagggatccgagaggccactgaccgacacagagagggccacccctgatggatgagccttaccggaa](#)  
[gtctaagctgacatatgccaggccagaaagctgctggcctggaggacaccgcttcttaagggcctgagatacggcaaggataatgccaggcctccacactgatggag](#)  
[atgaaggcctatcacgcatctctcgccttgagaaggaggcctgaaggacaagaagccccctgaacctgagctccgagctgagggatgagatcggcaccgcttct](#)  
[ctctgttaagaccgacgaggatcacaggccgctgaaggacagggctgagcctgagatctggaggccctgctgaagcacatcttctgataagttgtgagatcagc](#)  
[ctgaaggccctgagaaggatcgtgcccactgatggagcaggcgaagcggctacgacgaggcctgcgagatctacggcctgactatggcaagaagaacacagaggaga](#)  
[agatctatctgcccctatccctgcccagagatcagaaatcctgtggtgctgagggcctgcccaggcaagaaagtgatcaacggagtggtgcccggctacggatctcca](#)  
[gcccggatccacatcgagaccgccaagagaagtgaggcaagagctcaaggaccggaaggagatcagaagagacaggaggagaatcgcaaggatcgggagaagggccc](#)  
[gcaagtttagggagacttccctaactttgtggcgagcaaaagctcaaggacatcctgaagctgcgctgtacgagcagcagcagcagcagcagcagcagcagcagcagc](#)  
[agatcaatctggtgcccgtgaacgagaagggctatgtggagatcgatcacgcccctgcttctccagaacctgggacgattctttaaacaataagtgctggtgctggcgagc](#)  
[agaaccagaataagggcaatcagacaccatacagatattcaatggcaaggacaactccaggagtgaggagttcaaggcccgtgagacacttagatttcccagga](#)  
[gcaagaagcagcggatcctgctgcagaagttcgacgaggatggcttaaggagtgcaacctgaatgacaccagatacgtgaaccggttctgtgcccagttgtggcctca](#)  
[catcctgctgaccggcaagggaagagaaggggttcgctcctaatggccagatcacaacctgctgaggggatttggggactgaggaaggtgcccagagagaatgacag](#)  
[acaccagcactggatgagtggtggtgcatgacacccgtggcaatgacgagaagatcacaagattcgtgaggtataaggagatgaacgcctttgacggcaagacct](#)  
[cgataaggagacaggcaaggtgctgaccagaagaccacttccccagccttgggagttcttggccaggaaagtgatgatcggggttctggcaagccagacggcaagcct](#)  
[gagtttagggaggccgataccccagagaagctgaggacactgctggcagagaagctgtctagcaggccagaggcagtgacgagtagctgaccccactgttctgtccagg](#)  
[gcaccaatcggaaagatgtctggcggccacaaggacacactgagaagcggcaagaggttgaagcacaacgagaagatctcctgtaagagagtggtgctgaccgagat](#)  
[caagctggccgatctggagaacatggtgaattacaagaacggcagggagatcgagctgtatgagccctgaaggcaagctggaggcctacggaggaatgccaagcagg](#)  
[ccttgacccaaaggataacccctttataagaagggaggacagctggtgaagggcctgcccgtgggagagaagaccag](#)[CGT](#)[agcggcgtgctgctgaataagaagaacgc](#)  
[tacacaatcgccgacaacgccaccatggtgcccgtgacgtgtacaccaaggccgcaagaactacctggttctgtgtacgtgtggcaggtggccaggggcatcttacc](#)  
[accgcccgtgaccagcggcaagtcaggctgactgggacctgatcgatgagagcttcgagttcaagttctctctcccgggagatctctggaatgatctccaacaag](#)  
[ggcagaatcttggctactacaacggcctggacagagccaacggctctattggaattagagagcagcagcttagagaagagcaagggcaagacggcgtgcatagagtg](#)  
[agtgaaaacagctacagcatttaacaagtaaccctggtatcccctgggcaagagatccacagatgacgagcgaaccagacctgaaaatcaagtctaagaag](#)  
[aggat](#)[aaaagaaccggcagcgaatcgagcccaagaagaagagaaagtc](#)













Nme2-ABE8e-i1\_linker10 (D56R): [BPSV40-NLS](#), [nNme2Cas9](#), [TadA8e](#), Linkers

[MKRTADGSEFESPKKKRKV](#)[ED](#)[MAAFKPNPINYILGLAIGIASVGWAMVEIDEEENPIRLIDLGVRFERAEVPKTR](#)[RSLAMARRLARSVRRLTRR](#)  
[RAHLLRRARRLLKREGVLQAADFENGLIKSLPNTPWQLRAAALDRKLTPLEWSAVLLHLIKHRGYSQRKNEGETADKELGALLKGVANNAHAL](#)  
[QTGDFRTPAELALNKFEKESGHIRNQRGDYSHTFSRKDLQAEILLFEKQKEFGNPHVSGGLKEGIETLLMTQRPALSGDAVQKMLGHCTFEPAE](#)  
[PKAAKNTYTAERFIWLTKLNNLRILEQSGSGSGSGS](#)[SEVEFSHEYWMRHALLAKRARDEREVPVGA](#)[VLLNLRVIGEGWNRAIGLHDPTAH](#)  
[AEIMALRQGGLVMQNYRLIDATLYVTFEPCVMCAGAMIHSRIGRVVFGVNRNSKRGAAAGSLMNVLNYPGMNHRVEITEGILADECAALLCDFYR](#)  
[MPRQVFNAQKKAQSSIN](#)[ETPGTSESAT](#)[G](#)[SERPLDTERATLMDEPYRKSCLTYAQARKLLGLED](#)[T](#)[AFFKGLRYGKD](#)[NAEASTLMEMKAYHAISR](#)  
[ALEKEGLKDKKSPNLNLSSELQDEIGTAFSLFKTDEDITGRLKDRVQPEILEALLKHISFDKFVQISLKALRRIVPLMEQGKRYDEACAEIYGDHYGKKN](#)  
[TEEKIYLPPIADEIRNPVLRALSQARKVINGVRRYVGPARIHIETAREVGSFKDRKEIEKRQEENRKDREKAAAKFREYFPNFVGEPSKDILKL](#)  
[RLYEQQHGKCLYSGKEINLVRNLNEKGYVEIDHALPFSRTWDDSFNNKVLVLGSENQNKGNQTPYEYFNGKDNSREWQEFKARVETSRFPRSK](#)  
[QRILLQKFDEDFKECNLNDTRYVNRFLCQFVADHILLTGKGRRVFASNGQITNLLRGFWGLRKRVAENDRHALLDAVVACSTVAMQQKIT](#)  
[RFVRYKEMNAFDGKTIDKETGKVLHQKTHFPQPWEFFAQEVMIRVFGKPDGKPEFEADTPEKLRLLAEKLSRPEAVHEYVTLFVSRAPNRK](#)  
[MSGAHKDLRSKRFBVKNHEKISVKRVWLTEIKLADLENMNVNYKNGREIELYEALKARLEAYGGNAKQAFDPKDNPFYKKGGLVKA](#)[VRVEKT](#)  
[QESGVLLNKKNAYTIADNGDMVRVDVFKVDKKGKNQYFIVPIYAWQVAENILPIDDCKGYRIDDSYFCFSLHKYDLIAFQKDEKSKVEFAYIN](#)  
[CDSNNGRFYLAWHDKGSKEQQFRISTQNLVLIQYQVNELGKEIRPCLRKKRPPVR](#)[ED](#)[KRTADGSEFESPKKKRKV](#)

[atg](#)[aaacggacagccgacggaagcgagttcgagtcaccaaagaagaagcggaaagtcgaagat](#)[atggccgcttcaagcctaacc](#)[caatcaattacatcctgggactggccatcg](#)  
[gaatcgcatcctgggatgggctatggtggagatcgacgaggaggagaatcctatccggctgatcgatctggcgtgagagtggttagagggcggaggtgccaagacccggc](#)  
[GT](#)[tctctgctatggccggagactggcagggagcgtgaggcctgacacggagaagggcacacaggctgctgagggcacccggctgctgaagagagaggcgtgctgcag](#)  
[gcagcagacttcgatgagaatggcctgatcaagacctccaaaacccccctggcagctgagagcagccgctggacaggaagctgacaccactggagtgctgctgctgc](#)  
[tgcacctgatcaagcaccgctgctacctgagccagcgggaagaacgaggagagacagcagacaaggagctggcgccctgctgaagggagtgccaacaatgccacgctg](#)  
[cagaccggcgattcaggacacctgcccagctggcctgaataagttgagaaggagtcggccacatcagaaaccagagggcgactatagccacaccttctcccgaagatct](#)  
[gcaggccgagctgatcctgctgttcgagaagcagaaggagttggcaatccacacgtgagcggagcctgaaggagggaatcgagaccctgctgatgacacagaggcctgccc](#)  
[tccggcgacgcagtgagaagatgctgggacactgcaccttcgagcctgcagagccaaagggccgaagaacacctacacagccgagcggttatctggctgacaaagctgaac](#)  
[atctgagaatcctggagcagtcctggcggtcagtgatcaggcggtagctctgaggtggagtttccacagagactggatgagacatgccctgaccctggccaagagggcagcg](#)  
[gatgagagggaggtgctgtgggagccgtgctggtgctgaacaatagagtgatcggcgagggctggaacagagccatcggcctgcacgaccaacagccatgccaaattatgg](#)  
[ccctgagacagggcgccctggtcatgcagaactacagactgattgacccacctgtacgtgacattcgagccttgcgtgatgtgcccggcgccatgatccactctaggatcggcc](#)  
[gcgtggtgtttggcgtgaggaacagcaaacggggcggcaggctccctgatgaactgctgactacccccgcatgaatcaccgctgaaattaccgaggggaatcctggcagat](#)  
[gaatgtgcccctgctgtgagacttctaccggatgctgagacaggttcaatgctcagaagaaggccagagctccatcaacgagacacctggcacaagcgagagcgcaacag](#)  
[gatccgagagggcactgaccgacacagagagggccacctgatggatgagcctaccggaagtctaagctgacatatgccaggccagaaagctgctggcctggaggacaccg](#)  
[ccttcttaagggcctgagatacggcaaggataatgcccaggcctccacactgatggagatgaaggcctatcacgcatctctcgccctggagaaggaggcctgaaggacaag](#)  
[aagtcctccctgaacctgagctccgagctgcaggatgagatcggcaccgcttctctgtttaaagaccgagggatatacagggcctgaaggacagggctgagcctgagat](#)  
[cctggaggccctgctgaagcacatctcttcgataagttgtgagatcagcctgaaggccctgagaaggatcgtgccatgatgagagcagggcaagcggtacgacgagggcctg](#)  
[ccgagatctacggcgatcactatggaagaagaacacagaggagaagatctatctgccccatccctgccagagatcagaaatcctgtggtgctgagggcctgcccaggca](#)  
[agaaaagtgatcaacggagtggtgcccggtagcggatcctcagcccggatccacatcgagaccgagagaagtgggcaagagctcaaggaccggaaggagatcgagaagag](#)  
[acaggaggagaatcgcaaggatcgggagaaggccggccaagtttagggagtagtccctaacttggggcgagccaaagtctaaggacatcctgaagctgcgctgacgag](#)  
[cagcagcagcgaagtgctgtatagcggcaaggagatcaatctggtgaggctgaacgagaaggctatgtggagatcgatcagccctgcttctccagaacctgggacgattct](#)  
[tttaacaataaggtgctggtgctgggagcagagaaccagaataagggcaatcagacaccatacagatatttcaatggaaggacaactccaggagtgaggagttcaaggccc](#)  
[gcgtggagaccttagattcccaggagcaagaagcagcggatcctgctgcagaagttgacgagagtgcttaaggagtgcaacctgaatgacaccagatacgtgaaccggtc](#)  
[ctgtgccagtttggccgatcacatcctgctgaccggcaaggcaagagaagggttctgctcctaatggccgatcacaacctgctgaggggatttggggactgaggaaggtg](#)  
[cgggcagagaatgacagacaccacgactggatgagtggtggtggcagcaccctggcaatgagcagagaagatcacaagattcgtgaggtataaggagatgaacgcctttg](#)  
[acggcaagaccatcgataaggagacaggcaaggtgctgaccagaagaccacttccccagcctgggagttcttggccaggaagtgatgatccgggtgttcggcaagccaga](#)  
[cggcaagcctgagttgaggagccgataccccagagaagctgaggacactgctggcagagaagctgctagcaggccagagcagtgacagtagtaccctgcttctgtg](#)  
[tccagggcaccatcggaagatgtctggcggccacaaggacacactgagaagcgaagaggttgaagcacaagagaagatcctgtaagagagtggtgctgaccgag](#)  
[atcaagctggccgatcggagaacatggtgaattacaagaacggcagggagatcgagctgtatgagccctgaaggcaaggtgaggcctacggaggaaatccaagcagggc](#)  
[ttcgaccaaagataacccttttataagaaggaggacagctggtgaaggcctgcccgggtggagaagaccagagagcggcgtgctgctgaataagaagaacgctacaca](#)  
[atcccgacaatggcgataggtgagagtgacgtgtctgtaaggtggataagaagggcaagaatcagtagtattatctgctcctatctatgctgaggtggccgagaacatcctg](#)  
[ccagacatcgattgcaaggctacagaatcgacgatagctatacattctgttttccctgcacaagatgacctgatcgcttccagaagatgagaagccaaggtggagttgct](#)  
[actatataatgagactcctcaacggcaggttctacctggcctggcagataagggcagcaaggagcagcagttcgcatctccaccagaatctggtgctgatccagaagatca](#)  
[ggtgaacgagctgggcaaggagatcaggccatgctggctgaagaagcggcaccctgcccggaggat](#)[aaaaaacggccgacggcagcgaattcgagccaagaagaagagg](#)  
[aaagtc](#)

iNme2-ABE8e-i1\_linker10: [BPSV40-NLS](#), [nNme2Cas9](#), [TadA8e](#), Linkers

Jenifer Dounda Lab, iNme2Cas9 (D16A) variant in domain-inlaid-i1 format

[MKRTADGSEFESPKKKRKV](#)[EDMAAFKPNPINYILGLAIGIASVGMVEIDEEENPIRLIDLGVRFERAEVPKTGDSLAMARRLARSVRRLTRR](#)  
[RAHLLRRARRLLKREGVLQAADFENGLIKSLPNTPWQLRAAALDRKLTPELWSAVLLHLIKHRGYLSQRKNEGETADKELGALLKGVANNAHAL](#)  
[QTGDFRTPAELALNKFESGHIRNQRDYSHTFSRKDLQAEILLFEKQKEFGNPHVSGGLKEGIETLLMTQRPALSGDAVQKMLGHCTFEPAE](#)  
[PKAAKNTYTAERFIWLTCLNNLRILEQSGGSGGSGGS](#)[SEVEFSHEYWMRHALTLAKRARDEREVPGAVLVLNNRVIGEGWNRAIGLHDPTAH](#)  
[AEIMALRQGGGLVMQNYRLIDATLYVTFEPCVMCAGAMIHSRIGRVVFGVRNSKRGAAAGSLMNVLNYPGMNHRVEITEGILADECAALLCDFYR](#)  
[MPRQVFNAQKKAQSSIN](#)[ETPGTSESAT](#)[GSERPLDTERATLMDEPYRKSCLTYAQARKLLGLEDTAFFKGLRYGKDNAEASTLMEMKAYHAISR](#)  
[ALEKEGLKDKKSPNLNLSSELQDEIGTAFSLFKTDEDITGRKLDVRQPEILEALLKHISFDKFVQISLALRRIVPLMEQGKRYDEACAEIYGDHYGKK](#)  
[TEEKIYLPPIPADEIRNPVLRALSQARKVINGVRRYVSPARIHIETAREVGSFKDRKEIEKRQEENRKDREKAAAFREYFPNFVGEPSKDILKL](#)  
[RLYEQQHGKCLYSGKEINLVRNLEKGYVEIDHALPFSRTWDDSFNNKVLVLGSENQNKGNQTPYEYFNGKDNSREWQEFKARVETSRFPRSK](#)  
[QRILLQKDFEDGFKECNLDTRYVNRFLCQFVADHILLTGKGRRVFASNGQITNLLRGFWGLRKVRAENDRHALLDAVVACSTVAMQKIT](#)  
[RFVRYKEMNAFDGKTIDKETGKVLHQKTHFPQPWEFFAQEVMIRVFGKPDGKPEFEEADTPEKLRLLAEKLSRPEAVHEVYVPLFVSRAPNRK](#)  
[MSGAHKGTLSAKRFVKHNEKISVKRVWLTKIRLAALENMVNYKNGREIELYEALKARLEAYGGNAKQAFDPKGNPFYKKGGLVKAVERVERT](#)  
[QKSGVLLNKKNAYTIADNGDMVRVDVFCVKDKGKNQYFIVPIYAWQVAENILPIDICKGYRIDDSYFCFLHKYDLIAFQKDEKSKVEFAYYIN](#)  
[CDSNNGRFYLAWHDKGSKEQQFRISTQNLVLIQYQVNELGKEIRPCLKKRPPVRE](#)[DKRTADGSEFESPKKKRKV](#)

[atgaaacggacagccgacggaagcaggttcgagtcaccaaagaagaagcggaaagtcgaagat](#)[atggccgcctcaagcctaaccatcaattacatcctggactggccatcg](#)  
[gaatcgatccctgggatgggctatggtggagatcgacgaggaggagaatcctatccggctgatcgatctggcgtgagagtggttagagggccgaggtgccaagaccggcga](#)  
[ttctctggctatggccggagactggcacggagcgtgaggcgcctgacacggagaagggcacacaggctgctgagggcacgccgctgctgaagagagagggcgtgctgcaggc](#)  
[agcagactcgatgagaatggcctgatcaagagcctgccaacacccctggcagctgagagcagccgctggaagcaggaagctgacaccactggagtggtctgctgctg](#)  
[cacctgatcaagcaccggctactgagccagcgaagaagcaggagagacagcagacaaggagctggcgccctgctgaagggagtggccaacaatgccacgcctgca](#)  
[gaccggcgatttcaggacacctgcccagctggcctgaataagttgagaaggagtcggccacatcagaaccagagggcgactatagccacaccttctcccgaaggatctgc](#)  
[aggccgagctgatcctgctgttcgagaagcagaaggagttggcaatccacacgtgagcggaggcctgaaggaggaatcgagaccctgctgatgacacagaggcctgcccctgct](#)  
[cggcgacgcagtcagaagatgctgggacactgacacctgagcctgagcagcgaagcggccaagaacacctacagccgagcggttatctggctgacaaagctgaacaat](#)  
[ctgagaatcctggagcagctggcggttcaggtggatcaggcggtagctctgaggtggagttttccacgagactggatgagacatgacctgacctggccaagagggcagcggca](#)  
[tgagagggaggtgctgtgggagccgtgctggtgctgaacaatagagtgatcgccgaggggctggaacagagccatcgccctgacagaccaacagccatgcccgaattatggcc](#)  
[ctgagacagggcggtgctgcatgagaactacagactgattgacgccaccctgtactgacattcgagccttgcgtgatgtgcccggcgccatgatccactctaggatcgccgc](#)  
[gtgtgtttggcgtgaggaacagcaaacggggcgccgagcctcctgatgaactgctgaactaccggcctgagatcaccgctgcaaataccgaggaatcctggcagatg](#)  
[aatgtgcccctgctgtgacttctaccggatgcttagacaggtgttaatgctcagaagaagggccagagctccatcaacgagacacctggcacaagcgagagcgcaacaagg](#)  
[atccgagagggcactgaccgacacagagagggccaccctgatggatgagccttaccggaagtctaagctgacatatgccaggccagaagagctgctggcctggaggacaccgc](#)  
[cttcttaaggcctgagatacggcaaggataatgccaggcctccacactgatggagatgaaggcctatcacgccatctctcgccctggagaaggagggcctgaaggacaag](#)  
[aagtccttgaacctgagctccgagctgaggatgagatcgccaccgcttctctgtttagaccgacgaggatcacaggccgctgaaggacagggctgagcctgagat](#)  
[cctggaggccctgctgaagcacatcttctgataagttgtgagatcagcctgaagccctgagaaggatcgccactgatggagcagggcaagcggtagcagcagggcctg](#)  
[ccgagatctacggcgatcactatggcaagaagaacagagagagaatctatctccccctatccctgcccagagatcagaatcctgtggtgctgagggccctgtcccaggca](#)  
[agaaaagtgatcaacggagtggtgcccgtacggatctccagcccgatccacatcgagaccgagagaagtgaggcaagagctcaaggaccggaaggagatcgagaagag](#)  
[acaggaggagaatcgcaaggatcgggagaagggccgccaagttagggagtagctcctaacttggggcgagcgaagctcaaggacatcctgaagctgcccctgacag](#)  
[cagcagcagcgaagtgctgtatagcggcaaggagatcaatctggtgaggctgaacgagaagggctatggagatcgatcagccctgcttctccagaacctgggacgattct](#)  
[tttaacaataagtgctggtgctggcagcagagaaccagaataagggcaatcagacaccatacagtagtatttcaatggcaaggacaactccaggagtgaggagttcaaggccc](#)  
[gctggagaccttagatttccaggagcaagaagcagcggatcctgctgagaagttgacgaggatggccttaaggagtgaacctgaatgacaccagatcgtgaaccggtc](#)  
[ctgtgccagtttggccgatcacatcctgctgaccggcaaggcaagagaaggggttgcctctaatggccagatcacaacctgctgaggggatttgggactgaggaaggtg](#)  
[cgggcagagaatgacagacaccacgactggatgagtggtggtgcatgacgaccgtggcaatgacgagagaagatcacaagatcctgaggtataaggagatgaacgccttg](#)  
[acggcaagaccatcgataaggagacaggcaaggtgctgaccagaagaccacttccccagccttgggagttcttggccaggaagtgatgacgggtgttggccaagccaga](#)  
[cggcaagcctgagttgaggagggcagatacccagagaagctgaggacactgctggcagagaagctgctagcaggccagagcagtgacagagtagtgacccactgttctgtg](#)  
[tccaggccaccaatcggaagatgctggtgcccacaagGGCacactgagaagcgaagaggttggtaagcacaacgagaagatcctggaagagagtggtgctgaccAA](#)  
[GatcAGGctggccGCCctggagaacatggtgaattacaagaacggcaggagatcagctgtatgagccctgaaggcaagctggaggcctacggaggaaatgccaagca](#)  
[ggcctcgacccaaagGGCaacccctttataagaaggaggacagctggtgaagccgtgagggtggagAGGaccagAAGagcggcgtgctgtaataagaagaacgc](#)  
[ctacacaatcgccgacaatggcgatatggtgagagtgagctgttctgaagtgataagaaggcaagaatcagtagtatttctgctcctatctatgctggcaggtggccgagaa](#)  
[catctgacagatcgattgcaaggctacagaatcgacgatagctatacattctgttttccctgcacaagatgacctgatcctccagaaggatgagaagccaaggtggag](#)  
[ttgctactatataattcgactccttaacggcaggttctacctggcctggcagataagggcagcaaggagcagcagtttgcgatctccaccagaatctggtgctgatccaga](#)  
[agtatcaggtgaacgagctggcaaggagatcaggcctatgctgctgaagaagcggccaccctgctggaggagat](#)[aaaagaaccggcagcggcagcgaattcgagcccaagaag](#)  
[aagaggaaagtc](#)





Nme2<sup>Smu</sup>-ABE8e-i1\_linker10 (D56R): [BPSV40-NLS](#), [Nme2Cas9 – delta PID](#), [TadA8e](#), [SmuCas9 PID](#), Linkers

[MKRTADGSEFESPKKKRKV](#)[ED](#)[MAAFKPNPINYILGLAIGIASVWAMVEIDEEENPIRLIDLGVRFERAEVPKTGR](#)[SLAMARRLARSVRRLTRR](#)  
[RAHLLRRARRLLKREGVLQAADFENGLIKSLPNTPWQLRAAALDRKLTPELWSAVLLHLIKHRGYSQRKNEGETADKELGALLKGVANNAHAL](#)  
[QTGDFRTPAELALNKFEKESGHIRNQRGDYSHTFSRKDLQAEILLFEKQKEFGNPHVSGGLKEGIETLLMTQRPALSGDAVQKMLGHCTFEPAE](#)  
[PKAAKNTYTAERFIWLTKLNNLRILEQSGSGSGSGSSEVEFSHEYWMRHALLAKRARDEREVPVGAUAVLVNLRVIGEGWNRRAIGLHDPTAH](#)  
[AEIMALRQGGVLMQNYRLIDATLYVTFEPCVMCAGAMIHSRIGRVVFGVRNSKRGAAGSLMNVLNYPGMNHRVEITEGILADECAALLCDFYR](#)  
[MPRQVFNAQKKAQSSIN](#)[ETPGTSESAT](#)[GSRPLDTERATLMDEPYRKSCLTYAQARKLLGLED](#)[TAFKGLRYGKDNAAESTLMEMKAYHAISR](#)  
[ALEKEGLKDKKSPNLNLSSELQDEIGTAFSLFKTDEDITGRLKDRVQPEILEALLKHISFDKFKVQISLALRRIVPLMEQGKRYDEACAEIYGDHYGKKN](#)  
[TEEKIYLPPIPADEIRNPVLRALSQARKVINGVRRYVSPARIHIETAREVGSFKDRKEIEKRQEENRKDREKAAAKFREYFPNFVGEPSKDILKL](#)  
[RLYEQQHGKCLYSGKEINLVRNLEKGYVEIDHALPFSRTWDDSFNNKVLVLGSENQNKGNQTPYEYFNGKDNSREWQEFKARVETSRFPRSK](#)  
[QRILLQKFDEDFGKFCENLNDTRYVNRFLCQFVADHILLTGKGRRVFASNGQITNLLRGFWGLRKRVAENDRHALLDAVVACSTVAMQQKIT](#)  
[RFVRYKEMNAFDGKTIDKETGKVLHQKTHFPQPWEFFAQEVMIRVFGKPDGKPEFEADTPEKLRLLAEKLSRPEAVHEVYVPLFVSRAPNRK](#)  
[MSGAHKDLRSKRVFKHNEKISVKRVWLTEIKLADLENMNVYKNGREIELYEALKARLEAYGGNAKQAFDPKDNPFYKKGGLVKAVERVEKT](#)  
[QESGVLLNKKNAYTIA](#)[DNATMVRVDVYTKAGKNYLVVYVWQVAQGLPNRAVTS](#)[GKSEADWDLIDESFEFKFSLSRGLVEMISNKGRIFGYY](#)  
[NGLDRANGSIGIREHDLKSKGKDGVRVGVKTATAFNKYHVDPLGKEIHRCSSEPRPTL](#)[KIKSKK](#)[ED](#)[KRTADGSEFESPKKKRKV](#)

[atgaaacggacagccgacggaagcgagttcgagtcaccaaagaagaagcggaaagtcgaagat](#)[atggccgcttcaagcctaaccatcaattacatctgggactggccatcg](#)  
[gaatcgatccgtgggatgggctatggtggagatcgacgaggaggagaatcctatccggctgatcgatctggcgtgagagtggttagagggccgaggtgccaagaccggc](#)  
[GT](#)[tctctgctatggccggagactggcagggagcgtgaggcctgacacggagaaggccacacaggctgctgagggcacgcccgtgctgaagagagaggcgtgctgag](#)  
[gcagcagacttcgatgagaatggcctgatcaagacctccaaaacccccctggcagctgagagcagccgctggacaggaagctgacaccactggagtgctgctgctgc](#)  
[tgcacctgatcaagcaccgctgctacctgagccagcggagaagcagggagagacagcagacaaggagctggcgccctgctgaagggagtgccaacaatgccacgcccctg](#)  
[cagaccggcgattcaggacacctgcccagctggcctgaataagttgagaaggagtcggccacatcagaaaccagagggcgactatagccacaccttctcccgaagatct](#)  
[gcaggccgagctgatcctgctgttcgagaagcagaaggattggcaatccacacgtgagcggagcctgaaggagggaatcgagacctgctgatgacacagaggcctgcccctg](#)  
[tccggcgacgcagtgagaagatgctgggacactgcaccttcgagcctgcagagccaaaggccccaagaacacctacacagccgagcggttatctggctgacaaagctgaaca](#)  
[atctgagaatcctggagcagtcctggcggtcagtgatcaggcggtagctctgaggtggagtttccacagagactggatgagacatgccctgaccctggccaagaggccacgc](#)  
[gatgagagggaggtgctgtgggagccgtgctggtgctgaacaatagagtgatcgccgagggctggaacagagccatcgccctgacgacccaacagccatgccgaattatgg](#)  
[ccctgagacagggcgccctggtcatgcagaactacagactgattgacccacctgtacgtgacattcgagccttgcgtgatgtgcccggcgccatgatccactctaggatcgcc](#)  
[gcgtggtgtttggcgtgaggaacagcaaacggggcgccgaggctccctgatgaactgctgactacccccgcatgaatcaccgctgcaattaccgaggggaatcctggcagat](#)  
[gaatgtgcccctgctgtgagacttctaccggatgctgagacaggttcaatgctcagaagaaggccagagctccatcaacgagacacctggcacaagcgagagcgcaacag](#)  
[gatccgagagggcactgaccgacacagagagggccacctgatggatgagcctaccggaagtctaagctgacatgcccaggccagaaagctgctggcctggaggacaccg](#)  
[ccttcttaagggcctgagatacggcaaggataatgcccaggcctccacactgatggagatgaaggcctatcacgcatctctcgcccctggagaaggaggcctgaaggacaag](#)  
[aagtcctccctgaacctgagctccgagctgcaggatgagatcgccaccgcttctctgtttaaagaccgagggatatacagggcctgaaggacagggctgagcctgagat](#)  
[cctggaggccctgctgaagcacatctttcgataagttgtgagatcagcctgaaggccctgagaaggatcgtgccatgatgagagcagggcaagcggtacgacgaggcctgcg](#)  
[ccgagatctacggcgatcactatggaagaagaacacagaggagaagatctatctgccccatccctgccagagatcagaaatcctgtggtgctgagggcctgcccaggca](#)  
[agaaaagtgatcaacggagtggtgcccgtacggatctccagcccggatccacatcgagaccgagagaagtgggcaagagctcaaggaccggaaggagatcgagaagag](#)  
[acaggaggagaatcgcaaggatcgggagaaggcccgccaagtttagggagctactccctaacttggggcgagccaaagtctaaggacatcctgaagctgcgctgacgag](#)  
[cagcagcagcgaagtgctgtatagcggcaaggagatcaatctggtgcccgtgaacgagaaggctatgtggagatcgatcagcctgccccttctccagaacctgggacgattct](#)  
[tttaacaataaggtgctggtgctgggagcagagaaccagaataagggaatcagacaccatacagatatttcaatggaaggacaactccaggagtgaggagttcaaggccc](#)  
[gcgtggagaccttagattcccaggagcaagaagcagcggatcctgctgcagaagttgacgaggatggcttaaggagtgaacctgaatgacaccagatacgtgaaccggtc](#)  
[ctgtgccagtttggccgatcacatcctgctgaccggcaaggcaagagaagggttctgcccctaatggccagatcacaacctgctgaggggatttggggactgaggaaggtg](#)  
[cgggcagagaatgacagacaccacgactggatgagtggtggtggatgacgaccctggcaatgagcagagaagatcacaagattcgtgaggtataaggagatgaacgcttctg](#)  
[acggcaagaccatcgataaggagacaggcaaggtgctgaccagaagaccacttccccagcctgggagttcttggcccaggaagtgatgatccgggtgttcggcaagccaga](#)  
[cggcaagcctgagttgaggagccgataccccagagaagctgaggacactgctggcagagaagctgctagcaggccagagcagtgacagagtagctgaccccactgttctgtg](#)  
[tccagggcaccatcggaagatgtctggcccacaaggacacactgagaagcgaagaggttgaagcacaagagaagatcctgtaagagagtggtgctgaccgag](#)  
[atcaagctggccgatcggagaacatggtgaattacaagaacggcagggagatcgagctgtatgagccctgaaggcaaggtgaggcctacggaggaaatccaagcagggc](#)  
[ttcgaccaaaggataacccttttataagaaggaggacagctggtgaaggcctgcccgggtggagaagaccagagagcggcgtgctgctgaataagaagaacgctacaca](#)  
[atcgccgacaacgccaccatggtgcccgtgacgtgtacccaaggccggcaagaactacctggttctgtgtacgtgtggcaggtggcccaggccatcttaccacaaccgcccgt](#)  
[gaccagggcaagtcaggctgactggacctgatcgatgagagctcgagttcaagttctctgtcccgggagatctctgtgaaatgatctccaacaaggccagaatcttcgg](#)  
[ctactacaacggcctggacagagccaacggctctattggaattagagagcagcactagagaagagcaagggcaagagcggcgtgcatagagtgaggagtgaaaacagctacag](#)  
[catttaacaagtaccagtgatcccctgggcaagagatccacagatgagcagcgaaccagacctacactgaaaaatcaagtctaagaaggagat](#)  
[aaaagaaccgcccagcgcagcgaattcgagccaagaagaagaggaaagtc](#)

iNme2<sup>Smu</sup>-ABE8e-i1\_linker10: [BPSV40-NLS](#), iNme2Cas9 – delta PID, [TadA8e](#), [SmuCas9 PID](#), Linkers

Jenifer Dounda Lab, iNme2Cas9 (D16A) variant with SmuCas9 PID swap in domain-inlaid-i1 format

[MKRTADGSEFESPKKKRKV](#)[EDMAAFKPNPINYILGLAIGIASVGMVEIDEEENPIRLIDLGVRVFERAEVPKTGDSLAMARRLARSVRRLTRR](#)  
[RAHLLRRARRLLKREGVLQAADFENGLIKSLPNTPWQLRAAALDRKLTPELWSAVLLHLIKHRGYLSQRKNEGETADKELGALLKGVANNAHAL](#)  
[QTGDFRTPAELALNKFESGHIRNQRDYSHTFSRKDLQAEILLFEKQKEFGNPHVSGGLKEGIETLLMTQRPALSGDAVQKMLGHCTFEPAE](#)  
[PKAAKNTYTAERFIWLTCLNNLRILEQSGGSGGSGGS](#)[SEVEFSHEYWMRHALTLAKRARDEREVPGAVLVLNNRVIGEGWNRAIGLHDPTAH](#)  
[AEIMALRQGGGLVMQNYRLIDATLYVTFEPCVMCAGAMIHSRIGRVVFGVRNSKRGAAAGSLMNVLNYPGMNHRVEITEGILADECAALLCDFYR](#)  
[MPRQVFNAQKKAQSSIN](#)[ETPGTSESAT](#)[GSERPLDTERATLMDEPYRKSCLTYAQARKLLGLEDTAFFKGLRYGKDNAEASTLMEMKAYHAISR](#)  
[ALEKEGLKDKKSPNLNLSSELQDEIGTAFSLFKTDEDITGRLKDRVQPEILEALLKHISFDKFVQISLALRRIVPLMEQGKRYDEACAEIYGDHYGKKN](#)  
[TEEKIYLPPIPADEIRNPVLRALSQARKVINGVRRYVGGSPARIHETAREVGSFKDRKEIEKRQEENRKDREKAAAFREYFPNFVGEPSKDILKL](#)  
[RLYEQQHGKCLYSGKEINLRLNEKGYVEIDHALPFSRTWDDSFNNKVLVLGSENQNKGNQTPYEYFNGKDNSREWQEFKARVETSRFPRSKK](#)  
[QRILLQKFDDEDFKECNLNDRYVNRFLCQFVADHILLTGKGRRVFASNGQITNLLRGFWGLRKRVAENDRHALLDAVVACSTVAMQKIT](#)  
[RFVRYKEMNAFDGKTIDKETGKVLHQKTHFPQPWEFFAQEVMIRVFGKPDGKPEFEEADTPEKLRLLAEKLSRPEAVHEVYVPLFVSRAPNRK](#)  
[MSGAHKGTLSAKRFVKHNEKISVKRVWLTKIRLAALENMVNYKNGREIELYEALKARLEAYGGNAKQAFDPKGNPFYKKGGLVKAVERVERT](#)  
[QKSGVLLNKKNAYTIAN](#)[DNATMVRVDVYTKAGKNYLVVYVWQVAQGIPLNRAVTSKSEADWDLIDESFEFKLSRGLVEMISNKGRIFGY](#)  
[NGLDRANGSIGIREHDLEKSKGKDGVRVGVKTATAFNKYHVDPLGKEIHRCSSEPRPTLKIKSKK](#)[EDKRTADGSEFESPKKKRKV](#)

[atgaaacggacagccgacggaagcaggttcgagtcaccaaagaagaagcggaaagtcgaagat](#)[atggccgcctcaagcctaaccatcaattacatcctggactggccatcg](#)  
[gaatcgatccctgggatgggctatggtggagatcgacgaggaggagaatcctatccggctgatcgatctggcgtgagagtggttagagggccgaggtgccaagacggcgca](#)  
[ttctctggctatggccggagactggcacggagcgtgaggcgcctgacacggagaagggcacacaggctgctgagggcacgccgctgctgaagagagagggcgtgctgcaggc](#)  
[agcagactcgatgagaatggcctgatcaagagcctgccaacacccctggcagctgagagcagccgctggaagcaggaagctgacaccactggagtggtctgctgctg](#)  
[cacctgatcaagcaccggctactgagccagcgaagaacgaggagagacagcagacaaggagctggcgccctgctgaagggagtggccaacaatgccacgcctgca](#)  
[gaccggcgatttcaggacacctgcccagctggcctgaataagttgagaaggagtcggccacatcagaaccagagggcgactatagccacaccttctcccgaaggatctgc](#)  
[aggccgagctgatcctgcttgcagaagcagaaggagttggcaatccacacgtgagcggaggcctgaaggaggaatcgagaccctgctgatgacacagaggcctgcccctgct](#)  
[cggcgacgcagtcagaagatgctgggacactgcacctcgagcctgcagagcacaagcggccaagaacacctacacagccgagcggttatctggctgacaaagctgaacaat](#)  
[ctgagaatcctggagcagctggcggttcaggtggatcaggcggtgagctctgaggtggagttttccacgagactggatgagacatgcctgacccctggccaagagggcagcggca](#)  
[tgagagggaggtgctgtgggagccgtgctggtgctgaacaatagagtgatcgccgaggggctggaacagagccatcgccctgcacgacccaacagcccatgccgaaattatggcc](#)  
[ctgagacagggcggtgctgcatgcagaactacagactgattgacgccaccctgtactgacattcgagccttgcgtgatgtgcccggcgccatgatccactctaggatcgccgc](#)  
[gtgtgtttggcgtgaggaacagcaaacggggcgccgagcctcctgatgaactgctgaactacccggatgaatcaccgctgcaaatcaccgaggaatcctggcagatg](#)  
[aatgtgcccctgctgtgacttaccggatgcttagacaggtgttaactgctcagaagaaggccagagctccatcaacgagacacctggcacaagcgagagcgcaacaagg](#)  
[atccgagagggcactgaccgacacagagagggccaccctgatggatgagcctaccggaagtctaagctgacatatgccaggccagaaagctgctggcctggaggacaccgc](#)  
[cttcttaaggcctgagatacggcaaggataatgccaggcctccacactgatggagatgaaggcctatcacgccatctctcgccctggagaaggagggcctgaaggacaag](#)  
[aagtcctcctgaacctgagctccgagctgaggatgagatcgccaccgcttctctgtttagaccgacgaggatcacagggcctgaaggacagggctgagcctgagat](#)  
[cctggaggcctgctgaagcacatctcttcgataagttgtgcatcagcctgaagccctgagaaggatcgccactgatggagcagggcaagcggtagcagcagggcctg](#)  
[ccgagatctacggcgatcactatggcaagaagaacagagagagaatctatctccccctatccctgcccagagatcagaatcctgtggtgctgagggcctgcccaggca](#)  
[agaaaagtgatcaacggagtggtgcccggtagcggatctccagcccgatccacatcgagaccgccaagagaagtgaggcaagagctcaaggaccggaaggagatcgagaagag](#)  
[acaggaggagaatcgcaaggatcgggagaagggccgccaagttagggagtagtccctaacttggggcgagccaagctcaaggacatcctgaagctgcgctgacagag](#)  
[cagcagcagcgaagtgtctgtatagcggcaaggagatcaatctggtgaggctgaacgagaaggctatgtggagatcgatcagccctgcttctccagaacctgggacgattct](#)  
[tttaacaataagtgctggtgctggcagcagagaaccagaataagggcaatcagacaccatacagtagtatttcaatggcaaggacaactccaggagtgaggagttcaaggccc](#)  
[gctggagaccttagatttccaggagcaagaagcagcggatcctgctgagaagttgacgaggatggctttaggagtgcaacctgaatgacaccagatcgtgaaccggttc](#)  
[ctgtccagtttggccgatcacatcctgctgacggcaaggcaagagaagggtgttcgctctaatggccagatcacaacctgctgaggggatttgggactgaggaaggtg](#)  
[cgggagagaaatgacagacaccacgactggatgagtggtggtgcatgacgaccgtggcaatgacgagagaagatcacaagatcctgaggtataaggagatgaacgccttg](#)  
[acggcaagaccatcgataaggagacaggcaaggtgctgaccagaagaccacttccccagccttgggagttcttggccaggaagtgatgatccgggtgttggccaagccaga](#)  
[cggcaagcctgagttgaggagggcagatacccagagaagctgaggacactgctggcagagaagctgctagcaggccagagcagtgacagagtagtgacccactgttctgtg](#)  
[tccagggacccaatcggaagatgctggtgcccacaagGGCacactgagaagcgaagaggttggtaagcacaacgagaagatcctggaagagagtggtgctgaccAA](#)  
[GatcAGGctggccGCCctggagaacatggtgaattacaagaacggcagggagatcagctgtataggcctgaaggcaaggctggaggcctacggaggaaatgccaagca](#)  
[ggcctcgacccaaagGGCaacccctttataagaaggaggacagctggtgaaggcctgagggtggagAGGaccagAAgagcggctgctgtaataagaagaacgc](#)  
[ctacacaatcgccgacaacgccacatggtgagggtgagctgtacaccaaggccggcaagaactacctggttctgtgtagctgtggcaggtggccaggcatcttaccaccc](#)  
[cgcctgaccagcggcaagtccgaggctgactggacctgatcgatgagagcttcaggttcaagttctctgtccggggagatcctgtggaatgatctccaacaagggcaga](#)  
[atcttcggctactacaacggcctggacagagccaacggcctatttgaattagagagcagcagcctagagaaggaaggcgaagcggcgtgcatagagtgaggatgaaaaca](#)  
[gctacagcatttaacaagtaccacgtggatccctggcaagagatccacagatgacgagcgaaccagacactgaaaatcaagtctaagaaggaggataaaaagaacc](#)  
[ggcagcggcagcgaattcgacccaagaagaagaggaaagtc](#)



eNme2-C-ABE8e-i1\_linker10: [BPSV40-NLS](#), [nNme2Cas9](#), [TadA8e](#), Linkers

David Liu Lab, eNme2-C ABE8e variant in domain-inlaid-i1 format

[MKRTADGSEFESPKKKRKV](#)[EDAAFKSNPINYILGLAIGIASVGWAMVEIDEEGNPIRLIDLGVRFERAEVPKTGDSLAMARRLARSVRRLTRRRRA](#)  
[HRLLRARRLLKREGVLQAADFENGLITSLPNTPWQLRAAALDRKLTPELWSAVLLHLIKHRGYLSQRKNEGETAAKELGALKGVANNAHALQT](#)  
[GDFRTPAELALNKFEKESGHIRNQRGDYSHTFSRKDLQAEILLFEKQKEFGNPHVSGGLKEGIETLLMTQRPALSGDAVQKMLGHCTLEPTEPK](#)  
[AAKNTYTAERFIWLTKLNNLRILEQSGGSGGSGGSSEVEFSHEYWMRHALTLAKRARDEREVPVGAVLVNLNRRVIGEGWNRAIGLHDPTAHAEI](#)  
[MALRQGGLVMQNYRLIDATLYVTFEPCVMCAGAMIHSRIGRVVFGVRNSKRGAAAGSLMNVLNYPGMNHRVEITEGILADECAALLCDFYRMP](#)  
[RQVFNAQKKAQSSINETPGTSESATGSRERPLDTERSTLMDEPYRKSCLTYAQAARKLLGLEDTAFFKGLRYGKDNAEASTLMEMKAYHAISRALE](#)  
[KEGLKDKKSPLNLSSELQDEIGTAFSLFKTDEDITGRKLDREVQPEILEALLKHISFDKVFQISLKALRRIVPLMEQKRYDEACAEIYGVHYGKKNTEE](#)  
[KIYLLPIPADEIRNPVLRALSQARKVINGVRRYGSARIHIETAREVGSFKDRKEIAKROENRKDREKAAAKFREYFPNFVGEPSKDKILKRLY](#)  
[EQQHGKCLYSGKEINLVRLEKGYVEIDHALPFSRTWDDSFNNKVLVLGSENQKGNQTPYEYFNGKDNSREWQEFKARVETSFRPSSKKQRIL](#)  
[LQKFDEGDGFKCNLDTRYVNRFLCQFVADHILLTGKGRVVASNGQITNLLRGFWRLRKVRAENDRHHALDAVVVACSTVAMQQKITRFVR](#)  
[YKEMNAFDGKTVDKETGKVLVQKTHFPQPWEFFAQEVMIRVFGKPDGKPEFEEADTPEKLRLLAEKLSRPEAVHEYVTPLFVSRAPNRKMSG](#)  
[AHKDLRSARFVKHNEKISVKRVWLTEIKLADLENMVNYKNGREIELYEALKARLEAYGGNAKQAFDPKDNPFYKGGQLVKAVRVEKTQKSG](#)  
[VLLNKKNAYTIADNGDMVRVDVFKVDKKGKNQYFIVPIYAWQVAENILPIDICKGYRIDDSYFCFLSHKYDLIAFQKDEKSKVEFAYYINCDS](#)  
[SGGFYLAWHDKGSRQFRISTQNLALIQYQVNELGKEIRPCLKKRPPVR](#)[SGGSKRTADGSEFESPKKKRKV](#)

[atgaaacggacagccgacggaagcaggttcgagtcaccaaagaagaagcggaaagtcgaagatgcagcattcaagtcaaaccatcaattacatcctgggactggcaatcgg](#)  
[atcgcacatcctgggatgggctatggtggagatcgacgaggagggaatcctatccggctgatcgatctggcgtgagagtggttgagagggccgaggtgccaagaccggcgattc](#)  
[tctggctatggccggagactggcacggagcgtgagcgctgacacggagaagggcacacaggctgctgagggcacccggctgctgaagagagggcgctgctgcaggcag](#)  
[cagacttcatgagaatggcctgatcacgagcttccaacacccctggcagctgagagcagccgctggacaggaagctgacaccactggagtggtctgccgtgctgctcac](#)  
[ctgatcaagcaccggctactctgagccagcgaagaacgagggagagacagcagccaaggagctggcgccctgctgaagggagtgccaacaatgccacgccctgcagac](#)  
[cggcgattcaggacacctgccgagctggccctgaataagtttgagaaggagtcggccacatcagaaaccagagggggcactatagccacaccttcccgaaggatctgcagg](#)  
[ccgagctgatcctgctgttcgagaagcagaaggagttggcaatccacacgtgagcggaggcctgaaggagggaatcgagacctgctgatgacacagaggcctgccctgtcgg](#)  
[cgacgcagtcagaagatgctggggcactgcacctgagcctacagagccaaaggcccaagaacacctacagccgagcggttatctgctgacaagctgaacaatctg](#)  
[agaatcctggagcagctggcggttcaggtggatcaggcggtagcctgaggtggagttttccaccagactctggatgagacatgcctgacctggccaagaggggcacgcgatga](#)  
[gagggaggtgctgtgggagcctgctggtgctgaacaatagatgatcgccgaggggctggaacagagccatcgccctgcacgacccaacagcccatgccgaattatggccctg](#)  
[agacagggcggcctggtcatgcagaactacagactgattgacgccacctgtactgacattcgagccttgcgtgatgtgcccggcgccatgatccacttaggatcgcccgctg](#)  
[gtgtttggcgtgaggaacagcaaacggggcggcaggctcctgatgaactgctgaactacccggatgaatcaccgctgcaaataccgaggggaatcctggcagatgaat](#)  
[gtgccccctgctgtgagacttctaccggatgcttagacaggtgttaatgctcagaagaaggccagagctccatcaacgagacacctggcacaagcgagagcgcaacaggatc](#)  
[cgagagggcactgaccgacacagagaggtccacctgatggatgagcctaccggaagttaaaactgacatatgccaggccagaagctgctggcctggaggacaccgcctc](#)  
[ttaaggcctgagatacggcaaggataatgccaggcctccacactgatggagatgaaggcctatcacgccatctctcgcgcctggagaaggaggcctgaaggacaagaagt](#)  
[ccccctgaacctgagctccgagctgcaggatgagatcgccaccgcttctctgtttaagaccgacaggatatacagccgctgaaggacagggtgcagcctgagatcctg](#)  
[gagccctgctgaagcacatctttcagataagtttgagatcagcctgaaggccctgagaaggatcgtgccactgatggagcagggcaagcggtacgacaggcctgcgccga](#)  
[gatctacggcttcaatggaagaacacagaggagaagatctatctcccctatcctgcccagcagatcagaaatctgtggtgctgagggcctgtcccaggcaagaa](#)  
[aagtgatcaacggagtggtgcccggctacggatctccagcccgatccacatcgagaccgagagaagtgaggcaagagcttcaaggaccggaaggagatcgcaagagacag](#)  
[gaggagaatcgcaaggatcgggagaaggccgccaagtttagggagacttccctaactttggtggcgagccaaagttaaggacatcctgaagctgcctgtacgagcagc](#)  
[agcacggcaagtgtctatagcggcaagagatcaatctggtgcccctgaacgagaaggctatgtggagatcgatcacgccctgcttctccagaacctgggagcattcttta](#)  
[acaataaggtgctggtgctggcagcagagaaccagaataaggccaatcagacaccatacagatattcaatggcaaggacaactccagggagtgaggaggtcaaggcccgcg](#)  
[tggagaccttagatttccagtagcaagaagcagcggatcctgctgcagaagttcgacgaggatggctttaaggagtgcaacctgaatgacaccagatacgtgaaccggtctctgt](#)  
[gccagttgtggcagatcacatcctgctgaccggcaaggcaagagaagggtgctccttaatggccagatcacaacctgctgagggggtttggagactgaggaaggtgccc](#)  
[gcagagaatgacagacaccgcactggatgagtggtggtggcatgacgaccggtgcaatgcagcagaagatcacaagattctgaggtataaggagatgaacgccttgacg](#)  
[gcaagacctcgataaggagacagggcaaggtgctgtaccagaagaccacttccccagcctgggagttctttcccaggaagttatgatccgggtgttcggcaagccagacggc](#)  
[aagcctgagtttgaggaggccgataccccagagaagctgaggacactgctggcagagaagctgtctagcaggccagaggcagtgacagtagctgacccccgctgttctgttcca](#)  
[gggcaaccaatcggaagatgctggcggcccaaggacacactgagaagcgaagaggtttgtaagcacaacgagaagatctcctgaagagagtggtgctgaccgagatca](#)  
[agctggccgatctggagaacatggtgaattacaagaacggcaggagatcgagctgatgagccctgaaggcaagctggaggcctacggaggaatccaagcaggcctcg](#)  
[acccaaggataaccctttataagaaggaggacagctggtgaaggcctgcccgtggagaagaccagaagagcggcgtgctgtaataagaagaacgctacacaatcg](#)  
[ccgacaatggtgatattggtgagagtgagcgttctgtaaggtggataagaaggcaagaatcagactttatctgctctatctatgctgaggtggccgagaacctctgccag](#)  
[acatcgattgcaagggtacagaatcgacgatagctatacattctgttttccctgcacaagatgacctgatgccttccagaaggatgagaagtcgaaggtggagtttgctactat](#)  
[atcaattgcgactccttagcggcggttctacctggcctggcagataaggcagcagggagcagcggttcgatctccaccagaatctggcctgatccagaagatcaggtg](#)  
[aacgagctgggcaaggagatcaggccatgctggctgaagaagcggccaccctgctggctgagcggctcaaaaagaaccgcccagcggcaggaattcgagccaagaagaag](#)  
[gaaagtc](#)

**Nme2-ABE8e-i8\_linker10 (WT):** [BPSV40-NLS](#), [Nme2Cas9 – delta PID](#), [TadA8e](#), [SmuCas9 PID](#), [Linkers](#)

[MKRTADGSEFESPKKKRKV](#)[EDMAAFKPNPINYILGLAIGIASVGWAMVEIDEEENPIRLIDLGVRFERAEVPKTGDSLAMARRLARSVRRLTRR](#)  
[RAHRLLRARRLLKREGVLQAADFENGLIKSLPNTPWQLRAAALDRKLTPLEWSAVLLHLIKHRGYSQRKNEGETADKELGALLKGVANNAHAL](#)  
[QTGDFRTPAELALNKFEKESGHIRNQRGDYSHTFSRKDLQAEILLFEKQKEFGNPHVSGGLKEGIETLLMTQRPALSGDAVQKMLGHCTFEPAE](#)  
[PKAAKNTYTAERFIWLTKLNNLRILEQGSERPLDTERATLMDEPYRKSCLTYAQARKLLGLEDTAFFKGLRYGKDNAEASTLMEMKAYHAISRAL](#)  
[EKEGLKDKKSPNLNLSSELQDEIGTAFSLFKTDEDITGRLKDRVQPEILEALLKHISFDKFVQISLALRRIVPLMEQ GKRYDEACAEIYGDHYGKKNTE](#)  
[EKIYLPPIPADEIRNPVLRALSQARKVINGVVRRYGSPARIHIETAREVGSFKDRKEIEKRQEENRKDREKAAAKFREYFPNFVGEPSKDILKRLR](#)  
[YEQQHGKCLYSGKEINLVRLEKGYVEIDHALPFSRTWDDSFNNKVLVLGSENQNKGNQTPYEYFNGKDNSREWQEFKARVETSRFPRSKKQRI](#)  
[LLQKFDDEDGFKECNLNDRYVNRFLCQFVADHILLTGKGKRRVFNASNGQITNLLRGFWGLRKRVAENDRHHALDAVVACSTVAMQQKITRFV](#)  
[RYKEMNAFDGKTIDKETGKVLHQKTHFPQPWEFFAQEVMIRVFGKPDGKPSGGSGSGSSEVEFSHEYWMRHALTLAKRARDEREVPVGA](#)  
[VLVLNNRVIGEGWNRAIGLHDPTAHAEIMALRQGLVMQNYRLIDATLYVTFEPCVMCAGAMIHSRIGRVVFGVRNSKRGAAASLMNVLNYP](#)  
[GMNHRVEITEGILADECAALLCDFYRMPROQVFNAQKKAQSSIN](#)[ETPGTSESAT](#)[E](#)[F](#)[E](#)[E](#)[A](#)[D](#)[T](#)[P](#)[E](#)[K](#)[L](#)[R](#)[T](#)[L](#)[L](#)[A](#)[E](#)[K](#)[L](#)[S](#)[R](#)[P](#)[E](#)[A](#)[V](#)[H](#)[E](#)[Y](#)[V](#)[T](#)[P](#)[L](#)[F](#)[V](#)[S](#)[R](#)[A](#)[P](#)[N](#)[R](#)[K](#)[M](#)  
[SGAHKDTLRSARFVKHNEKISVKRVWLTEIKLADLENMVNYKNGREIELYEALKARLEAYGGNAKQAFDPKDNPFYKGGQLVKAVRVEKTQE](#)  
[SGVLLNKKNAYTIADNGDMVRVDVFCVKDKGKNQYFIVPIYAWQVAENILPIDIDCKGYRIDDSYFCFSLHKYDLIAFQKDEKSKVEFAYYINCD](#)  
[SSNGRFYLAWHDKGSKEQQFRISTQNLVLIQKYQVNELGKEIRPCLKKRPPVRE](#)[DKRTADGSEFESPKKKRKV](#)

[atgaaacggacagccgacggaagcaggttcgagtcaccaagaagaagcggaaagtcgaagat](#)[atggccgcttcaagcctaaccataatcatctgggactggCcatc](#)  
[ggaatcgcatccgtggatgggctatggtggagatcgacgaggaggagaatcctatccggctgatcgatctggcgtgagagtggttagagggccgaggtgcaaaagaccggcg](#)  
[attctctggctatggccggagactggcacgagcgtgaggcgcctgacacggagaagggcacacagctctgagggcacgcccgtctgaagagagagggcgtgctgcagg](#)  
[cagcagacttcgatgagaatggcctgatcaagagcctgcaaacaccccctggcagctgagagcagcccgctggacaggaagctgacaccactggagtggctgcctgctgct](#)  
[gcacctgatcaagcaccgctacctgagccagcgaagaacgaggagagacagcagacaaggagctggcgccctgctgaaggagtgccaacaatgccacgcccctgc](#)  
[agaccggcgatttcaggacacctgcccagctggcctgaataagttgagaaggagtcggccacatcagaaaaccagagggcgactatagccacacctctcccgaaggatctg](#)  
[caggcagctgatcctgcttcgagaagcagaaggagttggcaatccacactgagcggaggcctgaaggagggaatcgagaccctgctgatgacacagaggcctgcctgt](#)  
[ccggcgacgcagtcagaagatgctgggacactgcacctgagcctgcagagccaaaggcccaagaacacctacacagccgagcggtttatctggctgacaaagctgaaca](#)  
[atctgagaatcctggagcaggatccgagagggcactgaccgacacagagagggccacctgatggatgagcctaccggaagtctaagctgacatatgccaggccagaaagct](#)  
[gctggcctggaggacaccgcttcttaaggcctgagatacggcaaggataatgccaggcctccacactgatggagatgaaggcctatcacgcatctctcgcgcccctggaga](#)  
[aggaggcctgaaggacaagaagtcacctgagctccgagctgcaggatgagatcgccaccgcttctctgtttagaccgacgaggatcacaggccgctgaag](#)  
[gacagggcagcctgagatcctggaggcctgctgaagcacatctcttcgataagttgtgagatcagcctgaaggcctgagaaggatcgtgacctgatggagcagggcaa](#)  
[cggtacgacgaggcctgcgcccagatctacggcgatcactatggcaagaagaacacagaggagaagatctatgcccctatccctgcccagcagatcagaaatctgtggtg](#)  
[ctgaggccctgtcccaggcaagaaaagtgatcaacggagtggtgcccgtacggatctccagcccgatccacatcgagaccgcccagagaagtgggcaagagctcaaggac](#)  
[cgaaggagatcgagaagagacaggaggagaatcgcaaggatcgggagaaggccgcccgaagtttagggagtactccctaacttggggcgagccaaagtcaaggacatc](#)  
[ctgaagctgcgctgtacgacgacgacgcaagtgctgtatagcggcaaggagatcaatcggctgagcctgaacgagaaggcctatggagatcgatcacgcccctgcctt](#)  
[ctccagaacctgggacgattctttaacaataagtgctggtgctggcagcagagaaccagaataaggccaatcagacaccatacagatattcaatggcaaggacaactccaggg](#)  
[agtggcaggagttcaaggcccgtggagaccttagatttcccaggagcaagaagcagcggatcctgctgcagaagttcgacgaggatggcttaaggagtgcaacctgaatga](#)  
[caccagatacgtgaaccggtcctgtgacagttgtggccgatcacatcctgctgaccgcaaggcaagagaagggttgcctctaattggccagatcacaacctgctgagggg](#)  
[atgttgggactgaggaaggtgcccgcagagaatgacagacaccacgactggatgagtggtggtggcatgacacccctggcaatcgacgagaagatcacaagattcgtgag](#)  
[gtataaggagatgaacgctttagcggcaagaccatcgataaggagacaggcaagtgctgaccagaagaccacttccccagcctgggagttcttggccaggaagtgatga](#)  
[tccgggtgttcggcaagcagacggcaagccttctggcggttcaggtggatcaggcggtagc](#)[ctgaggtggagtttcccacgagtactggatgagacatgacctgacctggcca](#)  
[agaggccacgcatgagaggaggtgctgtggagccgtgctggtgctgaacaatagagtgatcgccgagggctggaacagagccatcgccctgcacgaccaacagcccag](#)  
[ccgaaattatggccctgagacagggcggcctggtcatgcagaactacagactgattgacgccacctgtacgtgacattcgagccttgcgtgatgtgcggcgccatgatccact](#)  
[ctaggatcgcccgctggtgttggcgtgagggaacagcaaacggggcggcaggctccctgatgaactgctgaactacccggcatgaatcaccgctgcaaataccagggg](#)  
[aatcctggcagatgaatgtgcccctgctgtgagcttctaccggatgcctagacaggtgtcaatgctcagaagaaggccagagctccatcaacgagacacctggcacaagc](#)  
[agagcgaaca](#)[gagttgaggaggccgataccccagagaagctgaggacactgctggcagagaagctgtctagcaggccagaggcagtcacgagtagctgacctactgttcg](#)  
[tgtccaggccaccaatcggaagatgtctggcggccacaaggacacactgagaagcgaagaggttgaagcacaacgagaagatctcctgaaagagagtggtgctgaccg](#)  
[agatcaagctggccgatctggagaacatggtgaattacaagaacggcagggagatcgagctgtataggccctgaaggcaaggctggaggcctacggaggaaatgcaagcag](#)  
[gccttcgacccaaaggataaccctttataagaaggaggacagctggtgaaggcctgcccgtggagaagaccaggagagcggcgtgctgctgaataagaagaacgctac](#)  
[acaatgccgacaatggcgatatggtgagagtgagctgttctgtaaggtgataagaaggcaagaatcagtacttatcgtgcctatctatgctggcaggtggccgagaacatc](#)  
[ctgcagacatcgattgcaaggctacagaatcgacgatagctatactctgttttccctgcacaagatgacctgatcgcttccagaaggatgagaagtcgaagtgaggttg](#)  
[cctactatcaattgagactccttaacggcaggttctacctggcctggcagataaggcagcaaggagcagcagtttcgatctccaccagaatctggtgctgatccagaagta](#)  
[tcaggtgaacgagctgggcaaggagatcaggccatgctgctgaagaagcggccaccctgcccggaggat](#)[aaaagaaccgacgagcgaattcgaccgaagaagaaga](#)  
[ggaagtc](#)

**Nme2-ABE8e-i8\_linker10 (E932R):** [BPSV40-NLS](#), [Nme2Cas9 – delta PID](#), [TadA8e](#), [SmuCas9 PID](#), [Linkers](#)

[MKRTADGSEFESPKKKRKV](#)[ED](#)[MAAFKPNPINYILGLAIGIASVGMVEIDEEENPIRLIDLGVRFERAEVPKTGDLSLAMARRLARSVRRLTRR](#)[RAHRLLRARRLLKREGVLQAADFENGLIKSLPNTPWQLRAAALDRKLTPLWSAVLLHLIKHRGYLSQRKNEGETADKELGALLKGVANNAHAL](#)[QTGDFRTPAELALNKFEKESGHIRNQRGDYSHTFSRKDLQAEILLFEKQKEFGNPHVSGGLKEGIETLLMTQRPALSGDAVQKMLGHCTFEPAE](#)[PKAAKNTYTAERFIWLTKLNNLRILEQGSERPLDTERATLMDEPYRKSCLTYAQARKLLGLEDTAFFKGLRYGKDNAEASTLMEMKAYHAISRAL](#)[EKEGLKDKKSPNLNLSSELQDEIGTAFSLFKTDEDITGRLKDRVQPEILEALLKHISFDKFVQISLALRRIVPLMEQ GKRYDEACAEIYGDHYGKKNTE](#)[EKIYLPPIPADEIRNPVLRALSQARKVINGVVRRYGSPARIHIETAREVGSFKDRKEIEKRQEENRKDREKAAAKFREYFPNFVGEPSKDILKRL](#)[YEQQHGKCLYSGKEINLVRLEKGYVEIDHALPFSRTWDDSFNNKVLVLGSENQNKGNQTPYEYFNGKDNSREWQEFKARVETSRFPRSKQRI](#)[LLQKFDDEDGFKECNLNDTRYVNRFLCQFVADHILLTGKGKRRVFNASNGQITNLLRGFWGLRKRVAENDRHHALDAVVACSTVAMQQKITRFV](#)[RYKEMNAFDGKTIDKETGKVLHQKTHFPQPWEFFAQEVMIRVFGKPDGKPSGSGSGSGSSEVEFSHEYWMRHALTLAKRARDEREVPVGA](#)[VLVLNRRVIGEGWNRAIGLHDPTAHAEIMALRQGLVMQNYRLIDATLYVTFEPCVMCAGAMIHSRIGRVVFGVRNSKRGAAASLMNVNLNYP](#)[GMNHRVEITEGILADECAALLCDFYRMPROQVFNAQKKAQSSIN](#)[ETPGTSESAT](#)[E](#)[FEEADTPEKLRLLAEKLSRPEAVHEYVTPLFVSRAPNRKM](#)[SGAHKDLRSARFVKHNEKISVKRVWLTEIKLADLENMVNYKNGREIELYEALKARLEAYGGNAKQAFDPKDNPFYKGGQLVKAVRVEKT](#)[R](#)[RE](#)[SGVLLNKKNAYTIADNGDMVRVDVFCVKDKGKNQYFIVPIYAWQVAENILPIDIDCKGYRIDDSYFCFSLHKYDLIAFQKDEKSKVEFAYYINCD](#)[SSNGRFYLAWHDKGSKEQQFRISTQNLVLIQYQVNELGKEIRPCLKRRPPVRE](#)[DKRTADGSEFEPKKKRKV](#)

[atgaaacggacagccgacggaagcaggttcgagtcaccaaagaagaagcggaaagtcgaagat](#)[atggccgcctcaagcctaaccatcaattacatcctggactggCcatc](#)[ggaatcgcatcctgggatgggctatggtggagatcgacgaggaggagaatcctatccggctgatcgatctggcgtgagagtggttagagggccgaggtgcaaagaccggcg](#)[attctctggctatggccggagactggcacggagcgtgaggcgcctgacacggagaagggcacacagctctgagggcacgcccgtctgaagagagagggcgtgctgcagg](#)[cagcagacttcgatgagaatggcctgatcaagagcctgccaacaccccctggcagctgagagcagcccgctggacaggaagctgacaccactggagtggctgcctgctgct](#)[gcacctgatcaagcaccgcggtacctgagccagcgaagaacgaggagagacagcagacaaggagctggcgccctgctgaaggagtgccaacaatgccacgacctgc](#)[agaccggcgatttcaggacacctgcccagctggcctgaataagttgagaaggagtccggccacatcagaaaaccagagggcgactatagccacacctctcccgaaggatctg](#)[caggcagctgatcctgcttcgagaagcagaaggatttgcaatccacactgagcggaggcctgaaggagggaatcgagaccctgctgatgacacagaggcctgcctgt](#)[ccggcgacgcagtcagaagatgctgggacactgcacctgagcctgcagagccaaaggcccaagaacacctacacagccgagcggtttatctggctgacaaagctgaaca](#)[atctgagaatcctggagcaggatccgagagggcactgaccgacacagagagggccacctgatggatgagcctaccggaagtctaagctgacatagccaggccagaaagct](#)[gctggcctggagacacgccttcttaaggcctgagatacggcaaggataatgccaggcctccacactgatggagatgaaggcctatcacgcatctctcgcgctggaga](#)[aggagggcctgaaggacaagaagtcacctgagctccgagctgcaggatgagatcggcaccgcttctctgtttagaccgacgaggatcacaggccgctgaag](#)[gacagggcagcctgagatcctggaggcctgctgaagcacatctcttcgataagttgtgagatcagcctgaaggcctgagaaggatcgtgacctgatggagcagggcaa](#)[cgggtacgacagggcctgcgcccagatctacggcgatcactatggcaagaagaacacagaggagaagatctatgcccctatccctgcccagcagatcagaaatctgtggtg](#)[ctgaggccctgtcccaggcaagaaaagtgatcaacggagtggtgcccggtagcggatctccagcccggatccacatcgagaccgcccagagaagtgggcaagagctcaaggac](#)[cggaaaggagatcgagaagagacaggaggagaatcgcaaggatcgggagaaggccgcccgaagttagggagtacttccctaacttggggcgagccaaagttaaggacatc](#)[ctgaagctgcgctgtacgagcagcagcagcgaagtgctgtatagcggcaaggagatcaatcgggtgcccgaagcagagagggctatggagatgatcacgacctgcctt](#)[ctccagaacctgggacgattctttaacaataagtgctggtgctggcagcagagaaccagaataaggccaatcagacaccatacagatattcaatggcaaggacaactccaggg](#)[agtggcaggagttcaaggcccgtggagaccttagatttcccaggagcaagaagcagcggatcctgctgcagaagttcgacgaggatggcttaaggagtgcaacctgaatga](#)[caccagatacgtgaaccggtcctgtgacagtttggccgatcacatcctgctgaccgcaaggcaagagaagggttgcctctaattggccagatcacaacctgctgagggg](#)[atggggactgaggaaggtgcccgcagagaatgacagacaccacgactggatgagtggtggtgcatgagcaccgtggcaatcgacgagaagatcacaagattcgtgag](#)[gtataaggagatgaacgctttagcggcaagaccatcgataaggagacaggcaagtgctgaccagaagaccacttccccagcctgggagttcttggccaggaagtgatga](#)[tccgggtgtcggcaagcagacggcaagccttctggcggttcaggtggatcaggcggtagc](#)[ctgaggtggagtttcccacgagtactggatgagacatgacctgacctggcca](#)[agagggcacgcatgagagggaggtgctgtggagccgtgctggtgctgaacaatagatgacggcagggctggaacagagccatcgccctgcacgaccaacagccatg](#)[ccgaaattatggccctgagacagggcggcctggtcatgcagaactacagactgattgacgccacctgtacgtgacattcgagccttgcgtgatgtgcggcgccatgatccact](#)[ctaggatcgcccgctggtgttggcgtgagggaacagcaaacggggcggcaggctccctgatgaactgctgaactacccggcatgaatcaccgctgcaaataccgaggg](#)[aatcctggcagatgaatgtgcccctgctgtgagcttctaccggatgcttagacaggtgtcaatgctcagaagaaggccagagctccatcaacgagacacctggcacaagc](#)[agagcgaaca](#)[gagttgaggagccgatacccgagaagctgaggacactgctggcagagaagctgcttagcaggccagaggcagtcacgagtactgacctactgttcg](#)[tgtccaggccaccaatcggaagatgctggcggccacaaggacacactgagaagcgaagaggttgaagcacaacgagaagatctcctgaaagagtggtgctgaccg](#)[agatcaagctggccgatctggagaacatggtgaattacaagaacggcagggagatcgagctgtataggccctgaaggcaaggctggaggcctacggaggaatgccaagcag](#)[gccttcgaccaaaggataaccctttataagaaggaggacagctggtgaaggcctgcccgggtggagaagaccag](#)[CGT](#)[agcggcgtgctgctgaataagaagaacgctac](#)[acaatgccgacaatggcgatatggtgagatggagctgttctgtaaggtgataagaaggcaagaatcagtacttatcgtgcctatctatgctggcaggtggccgagaacatc](#)[ctgcagacatcgattgcaaggctacagaatcgacgatagctatactgttttccctgcacaagatgacctgatcgcttccagaaggatgagaagtcgaagtgagttg](#)[cctactatcaattgagactccttaacggcaggttctacctggcctggcagataaggcagcaaggagcagcagtttcgatctccaccagaatctggtgctgatcagaagta](#)[tcaggtgaacgagctgggcaaggagatcaggccatgctgctgaagaagcggccacctgcccggagagat](#)[aaaagaaccggcagcggcagcgaattcgagccaagaagaaga](#)[ggaagtc](#)

**Nme2-ABE8e-i8\_linker10 (D56R):** [BPSV40-NLS](#), [Nme2Cas9 – delta PID](#), [TadA8e](#), [SmuCas9 PID](#), [Linkers](#)

[MKRTADGSEFESPKKKRKV](#)[ED](#)[MAAFKPNPINYILGLAIGIASVWAMVEIDEEENPIRLIDLGVRFERAEVPKTR](#)[RSLAMARRLARSVRRLTRR](#)  
[RAHLLRRARRLLKREGVLQAADFENGLIKSLPNTPWQLRAAALDRKLTPLEWSAVLLHLIKHRGYLSQRKNEGETADKELGALLKGVANNAHAL](#)  
[QTGDFRTPAELALNKFEKESGHIRNQRGDYSHTFSRKDLQAEILLFEKQKEFGNPHVSGGLKEGIETLLMTQRPALSGDAVQKMLGHCTFEPAE](#)  
[PKAAKNTYTAERFIWLTKLNNLRILEQGSERPLDTERATLMDEPYRKSCLTYAQARKLLGLEDTAFFKGLRYGKDNAEASTLMEMKAYHAISRAL](#)  
[EKEGLKDKKSPNLNLSSELQDEIGTAFSLFKTDEDITGRLKDRVQPEILEALLKHISFDKFVQISLALRRIVPLMEQGKRYDEACAEIYGDHYGKKNTE](#)  
[EKIYLPPIPADEIRNPVLRALSQARKVINGVVRRYGSPARIHIETAREVGSFKDRKEIEKRQEENRKDREKAAAKFREYFPNFVGEPSKDILKLRL](#)  
[YEQQHGKCLYSGKEINLVRLEKGYVEIDHALPFSRTWDDSFNNKVLVLGSENQNKGNQTPYEYFNGKDNSREWQEFKARVETSRFPRSKQRI](#)  
[LLQKFEDEDFKECNLNDRYVNRFLCQFVADHILLTGKGKRRVFNASNGQITNLLRGFWGLRKRVAENDRHHALDAVVACSTVAMQQKITRFV](#)  
[RYKEMNAFDGKTIDKETGKVLHQKTHFPQPWEFFAQEVMIRVFGKPDGKPSGGSGSGSSEVEFSHEYWMRHALTLAKRARDEREVPVGA](#)  
[VLVLNNRVIGEGWNRAIGLHDPTAHAEIMALRQGLVMQNYRLIDATLYVTFEPCVMCAGAMIHSRIGRVFVGRNSKRGAAASLMNVLNYP](#)  
[GMNHRVEITEGILADECAALLCDFYRMPROVFNAAQKKAQSSIN](#)[ETPGTSESAT](#)[E](#)[FEEADTPEKLRLLAEKLSRPEAVHEYVTPLFVSRAPNRKM](#)  
[SGAHKDLRSARFVKHNEKISVKRVWLTEIKLADLENMVNYKNGREIELYEALKARLEAYGGNAKQAFDPKDNPFYKGGQLVKAVRVEKTQE](#)  
[SGVLLNKKNAYTIADNGDMVRVDVFKVDKKGKNQYFIVPIYAWQVAENILPIDIDCKGYRIDDSYFCFSLHKYDLIAFQKDEKSKVEFAYYINCD](#)  
[SSNGRFYLAWHDKGSKEQQFRISTQNLVLIQYQVNELGKEIRPCLKKRPPVRE](#)[DKRTADGSEFESPKKKRKV](#)

[atgaaacggacagccgacggaagcgagttcgagtcaccaagaagaagcggaaagtcgaagat](#)[atggccgcttcaagcctaaccataatcatctgggactggCcatc](#)  
[ggaatcgcatcctgggatgggctatggtggagatcgacgaggaggagaatcctatccggctgatcgatctggcgtgagagtggttagagagggccgaggtgcaaaagaccggc](#)  
[GT](#)[tctctgctatggccggagactggcagggagcgtgaggcgctgacacggagaagggcacacaggctgctgagggcacccggctgctgaagagagagggcgtgctgcag](#)  
[gcagcagacttcgatgagaatggcctgatcaagagcctgcaaacacccccctggcagctgagagcagccgctggacaggaagctgacaccactggagtgctgctgctgc](#)  
[tgcacctgatcaagcaccgcgctacctgagccagcggagaacagggagagacagcagacaaggagctggcgccctgctgaagggagtgccaacaatgccacgcccctg](#)  
[cagaccggcgattcaggacacctgcccagctggcctgaataagttgagaaggagtcggccacatcagaaaccagagggggcactatagccacacctctcccgaagatct](#)  
[gcaggccgagctgatcctgctgttcgagaagcagaaggagttggcaatccacacgtgagcggagcctgaaggagggaatcgagacctgctgatgacacagaggcctgcccctg](#)  
[tccggcgacgcagtgacagaagatgctgggacactgcaccttcgagcctgcagagcacaagggccgcaagaacacctacacagccgagcggttatctggctgacaaagctgaaca](#)  
[atctgagaatcctggagcaggatccgagagggcactgaccgacacagagagggccacctgatggatgagcctaccggaagtctaagctgacatatgccaggccagaaagct](#)  
[gctgggctggagacaccgcttcttaagggcctgagatacggcaaggataatgccaggcctccacactgatggagatgaaggcctatcacgcatctctcgcgcccctggaga](#)  
[aggagggcctgaaggacaagaagtcacctgagctccgagctgcaggatgagatcggcaccgcttctctgtttaaagaccgacgaggatcacaggccgctgaag](#)  
[gacagggctgagcctgagatcctggaggcctgctgaagcacatctcttcgataagttgtgagatcagcctgaaggcctgagaaggatcgtgacctgatggagcagggcaa](#)  
[cgggtacgacagggcctgcccagatctacggcgatcactatggcaagaagaacacagaggagaagatctatgcccctatccctgcccagcagatcagaaatcctgtggtg](#)  
[ctgagggcctgtcccaggcaagaaaagtgatcaacggagtggtgcccggtagcggatctccagcccggatccacatcgagaccgccaagagaagtgggcaagagctcaaggac](#)  
[cggaaaggagatcgagaagagacaggaggagaatcgcaaggatcgggagaagggccgccaagtttagggagtagtccctaacttggggcgagcacaagctcaaggacatc](#)  
[ctgaagctgcccgtgacgagcagcagcagcgaagtgctgtatagcggcaaggagatcaatcgggtgcccgtgaacgagaagggctatggagatcgatcacgcccctgcttt](#)  
[ctccagaacctgggacgattctttaacaataaggtgctggtgctggcagcagagaaccagaataagggcaatcagacaccatacagatattcaatggcaaggacaactccaggg](#)  
[agtggcaggagttcaaggcccgtggagaccttagatctccaggagcaagaagcagcggatcctgctgcagaagttcgacgaggatggcttaaggagtgcaacctgaatga](#)  
[caccagatacgtgaaccggtcctgtgacagttgtggccgatcacatcctgctgaccgcaagggcaagagaaggggttcgctcctaattggccagatcacaacctgctgagggg](#)  
[atctggggactgaggaaggtgcccggcagagaatgacagacaccacgactggatgagtggtggtggcatgagcaccgtggcaatcgacgagaagatcacaagattcgtgag](#)  
[gtataaggagatgaacgctttgacggcaagaccatcgataaggagacaggcaagtgctgaccagaagaccacttccccagcctgggagttctttgccaggaagtgatga](#)  
[tccgggtgttcggcaagcagacggcaagccttctggcggttcaggtggatcaggcggtagc](#)[ctgaggtggagtttcccacgagtagtgatgagacatgacctgaccctggcca](#)  
[agagggcacgcgatgagagggaggtgctgtgggagcctgctggtgctgaacaatagagtgatcggcagggcctggaacagagccatcggcctgcacgaccaacagcccag](#)  
[ccgaaattatggccctgagacagggcgccctggtcatgcagaactacagactgattgacgccacctgtacgtgacattcgagccttgcgtgatgtgcggcgccatgatccact](#)  
[ctaggatcggccgctggtgtttggcgtgagggaacagcaaacggggcgccgaggctccctgatgaactgctgaactacccggcatgaatcaccgctgcaaatcaccagggg](#)  
[aatcctggcagatgaatgtgcccctgctgtgagcttctaccggatgcctagacaggtgtcaatgctcagaagaaggccagagctccatcaacgagacacctggcacaagcg](#)  
[agagcgaaca](#)[gagttgaggagccgatacccgagaagctgaggacactgctggcagagaagctgctagcaggccagagcagtcacgagtagctgacctactgttcg](#)  
[tgtccagggcaccatcggaagatgctggcgcccacaaggacacactgagaagcgaagaggttgaagcacaacgagaagatcctgtaagagagtggtgctgaccg](#)  
[agatcaagctggccgatctggagaacatggtgaattacaagaacggcagggagatcgagctgtataggccctgaaggcaaggctggaggcctacggaggaatgccaagcag](#)  
[gccttcgaccaaaggataaccctttataagaaggaggacagctggtgaaggcctgcccgggtggagaagaccaggagagcggcgtgctgctgaataagaagaacgctac](#)  
[acaatgccgacaatggcgatatggtgagagtgagctgttctgtaaggtgataagaaggcaagaatcagtagcttctctgctcctatctatgctggcaggtggccgagaacatc](#)  
[ctgcagacatcgattgcaaggctacagaatcgacgatagctatactgttttccctgcacaagtagcctgatcgcttccagaaggatgagaagtcgaagtgaggttg](#)  
[cctactatcaattgagactccttaacggcaggttctacctggcctggcagataagggcagcaaggagcagcagtttcgatctccaccagaatctggtgctgatccagaagta](#)  
[tcaggtgaacgagctgggcaaggagatcaggccatgctgctgaagaagcggccaccctgcccggagagat](#)[aaaagaaccggcagcggcagcgaattcgagccaagaagaaga](#)  
[ggaagtc](#)

Nme2<sup>Smu</sup>-ABE8e-i8\_linker10 (WT): [BPSV40-NLS](#), [Nme2Cas9 – delta PID](#), [TadA8e](#), [SmuCas9 PID](#), Linkers

[MKRTADGSEFESPKKKRKV](#)[EDMAAFKPNPINYILGLAIGIASVGMVEIDEEENPIRLIDLGVRFERAEVPKTGDLSLAMARRLARSVRRRLTR](#)  
[RAHLLRRARRLLKREGVLQAADFENGLIKSLPNTPWQLRAAALDRKLTPLEWSAVLLHLIKHRGYSQRKNEGETADKELGALLKGVANNAHAL](#)  
[QTGDFRTPAELALNKFEKESGHIRNQRGDYSHTFSRKDLQAEILLFEKQKEFGNPHVSGGLKEGIETLLMTQRPALSGDAVQKMLGHCTFEPAE](#)  
[PKAAKNTYTAERFIWLTKLNNLRILEQGSERPLDTERATLMDEPYRKSCLTYAQARKLLGLEDTAFFKGLRYGKDNAEASTLMEMKAYHAISRAL](#)  
[EKEGLKDKKSPNLNLSSELQDEIGTAFSLFKTDEDITGRLKDRVQPEILEALLKHISFDKFVQISLALRRIVPLMEQ GKRYDEACAEIYGDHYGKKNTE](#)  
[EKIYLPPIPADEIRNPVLRALSQARKVINGVRRYGS PARIHIETAREV GSKFDRKEIEKRQEENRKDREKAAAKFREYFPNFVGEPSKDILKRL](#)  
[YEQQHGKCLYSGKEINLVR LNEKGYVEIDHALPFSRTWDDSFNNKVLVLGSENQNKGNQTPYEYFNGKDNSREWQEFKARVETSRFPRSKQRI](#)  
[LLQKFDDEDGFKECNLNDRYVNRFLCQFVADHILLTGKGKRRV FASNGQITNLLRGFWGLRKRVAENDRHHALDAVVACSTVAMQQKITRFV](#)  
[RYKEMNAFDGKTIDKETGKVLHQKTHFPQPWEFFAQEVMIRVFGKPDGKPSGGSGSGSSEVEFSHEYWMRHALTLAKRARDEREVPVGA](#)  
[VLVLNNRVIGEGWNRAIGLHDPTAHAEIMALRQGLVMQNYRLIDATLYVTFEPCVMCAGAMIHSRIGRVVFGVRNSKRGAAASLMNVLNYP](#)  
[GMNHRVEITEGILADECAALLCDFYRMPROVFNAQKKAQSSIN](#)[ETPGTSESAT](#)[E](#)[FEEADTPEKLR](#)[TLLAEKLSRPEAVHEYV](#)[TPLFVSRAPNRKM](#)  
[SGAHKDLRSARFVKHNEKISVKRVWLTEIKLADLENMVNYKNGREI](#)[LYEALKARLEAYGNAKQAFDPKDNPFYKGGQLVKA](#)[RVEKTQE](#)  
[SGVLLNKKNAYTIA](#)[DNATMVRVDVYTKAGKNYLVVYVWQVAQGI](#)[LPNRAVTS](#)[GKSEADWDLIDESFEFKFSLSRGLVEMISNKGRI](#)[FGYYNG](#)  
[LDRANGSIGIREHDLEKSKGKDGVRVGVKTATAFNKYHVDPLGKEI](#)[HRCSSSEPRPTLKI](#)[SKKEDKRTADGSEFEPK](#)[KKRKV](#)

[atgaaacggacagccgacggaagcgagttcgagtcaccaagaagaagcggaaagtcgaagat](#)[atggccgcttcaagcctaacc](#)[caatcaattacatcctgggactggCcatc](#)  
[ggaatcgcatcctggtgagtgagctatggtgagatcgacgaggaggagaatcctatccggctgatcgatctggcgtgagagtggttagagggccgaggtgcaaagaccggcg](#)  
[attctctgctatggccggagactggcacgagcgtgagggcctgacacggagaagggcacacagctctgagggcagccggctctgaagagagagggcgtgctgcagg](#)  
[cagcagactctgatgagaatggcctgatcaagagcctgccaacaccccctggcagctgagagcagcccgctggacaggaagctgacaccactggagtggtctgcctgctgct](#)  
[gcacctgatcaagcaccgctacctgagccagcgaagaacgaggagagacagcagacaaggagctggcgccctgctgaaggagtgccaacaatgccacgacctgc](#)  
[agaccggcgatctcaggacacctgcccagctggcctgaataagttgagaaggagtcggccacatcagaaaaccagagggcgactatagccacacctctcccgaaggatctg](#)  
[caggcagctgatcctgcttcgagaagcagaaggagttggcaatccacactgagcggaggcctgaaggagggaatcgagacctgctgatgacacagaggcctgcctgt](#)  
[ccggcgacgcagtgagaagatgctgggacactgcacctgagcctgcagagccaaaggcccaagaacacctacacagccgagcggttatctggctgacaaagctgaaca](#)  
[atctgagaatcctggagcaggatccgagagggcactgaccgacacagagagggccacctgatggatgagcctaccggaagtctaagctgacatatgccaggccagaaagct](#)  
[gctggcctggagacacgccttcttaaggcctgagatacggcaaggataatgccaggcctccacactgatggagatgaaggcctatcacgcatctctcgcgctggaga](#)  
[aggagggcctgaaggacaagaagtcacctgagctccgagctgcaggatgagatcggcaccgcttctctgtttagaccgacgaggatcacaggccgctgaag](#)  
[gacagggcagcctgagatcctggaggcctgctgaagcacatctcttcgataagttgtgagatcagcctgaaggcctgagaaggatcgtgacctgatggagcagggcaa](#)  
[cgggtacgacgaggcctgcgagatctacggcgatcactatggcaagaagaacagaggagaagatctatgccccctatccctgcccagcagatcagaaatctgtggtg](#)  
[ctgagggcctgtcccaggcaagaaaagtgatcaacggagtggtgcccgtacggatctccagccggatccacatcgagaccgccaagagaagtgggcaagagctcaaggac](#)  
[cgaaggagatcgagaagagacaggaggagaatcgcaaggatcgggagaaggccgccaagtttagggagcttccctaacttggggcgagccaaagttaaggacatc](#)  
[ctgaagctgcgctgtacgagcagcagcagcgaagtgtctgtatagcggcaaggagatcaatcgtggtgagcgaagagggctatggagatcgatcacgacctgcctt](#)  
[ctccagaacctgggacgattctttaacaataagtgctggtgctggcagcagagaaccagaataagggcaatcagacaccatacagatattcaatggcaaggacaactccaggg](#)  
[agtggcaggagttcaaggcccgtggagaccttagatttcccaggagcaagaagcagcggatcctgctgcagaagttcgacgaggatggcttaaggagtgcaacctgaatga](#)  
[caccagatacgtgaaccggtcctgtgacagttgtggccgatcacatcctgctgaccgcaaggcaagagaagggtgttcctctaattggccagatcacaacctgctgagggg](#)  
[atgttgggactgaggaaggtgcccagagaaatgacagacaccacgactggatgagtggtggtggcatgagcaccgtggcaatcgacgagaagatcacaagattcgtgag](#)  
[gtataaggagatgaacgctttagcggcaagaccatcgataaggagacaggcaagtgctgaccagaagaccacttccccagcctgggagttcttggccaggaagtgatga](#)  
[tccgggtgttcggcaagcagacggcaagccttctggcggttcaggtggatcaggcggtagctctgaggtggagtttcccacgagtactggatgagacatgacctggcca](#)  
[agagggcacgcatgagagggaggtgctgtggagccgtgctggtgctgaacaatagagtgatcggcagggcctggaacagagccatcggcctgcacgaccaacagccatg](#)  
[ccgaaattatggcctgagacagggcggcctggtcatgcagaactacagactgattgacgccacctgtacgtgacattcgagccttgcgtgatgtgcggcgccatgatccact](#)  
[ctaggatcggccgctggtgttggcgtgagggaacagcaaacggggcggcaggctccctgatgaactgctgaactacccggcatgaatcaccgctgcaaataccagggg](#)  
[aatcctggcagatgaatgtgcccctgctgtgagcttctaccggatgcctagacaggtgtcaatgctcagaagaaggccagagctccatcaacgagacacctggcacaagc](#)  
[agagcgaaca](#)[gagttgaggagccgataccagagaagctgaggacactgctggcagagaagctgtctagcaggccagaggcagtcacgagtactgacctactgttcg](#)  
[tgtccaggccaccaatcggaagatgtctggcggccacaaggacacactgagaagcgaagaggttgaagcacaacgagaagatctcctgaagagagtggtgctgaccg](#)  
[agatcaagctggcagatctggagaacatggtgaattacaagaacggcagggagatcgagctgtataggccctgaaggcaaggctggaggcctacggaggaatgccaagcag](#)  
[gccttcgacccaaaggataaccctttataagaaggaggacagctggtgaaggcctgcccgtggagaagaccaggagagcggcgtgctgctgaataagaagaacgctac](#)  
[acaatcggc](#)[gacaacgccaccatggtgcccgtgacgtgtacccaaggccggcaagaactacctggttctgtgtacgtgtggcaggtggccagggcatctaccaaccgccc](#)  
[cgtgaccagcggcaagtccgagctgactggacctgatcgatgagagcttcaggttcaagttctctgtcccggggagatctctggaatgatctccaacaggcagaatctt](#)  
[cggctactacaacggcctggacagagccaacggctctattggaattagagagcagcagctagagaagagcaaggcgaagacggcgtgcatagagtgaggagtgaaaacagcta](#)  
[cagcatttaacaagtagaccctggatcccctgggcaagagatccacagatgagcagcgaaccagacctactgaaaatcaagctcagaaggaggat](#)[aaaagaaccgccc](#)  
[acggcagcgaattcgagccaagaagaaggaaagtc](#)

Nme2<sup>Smu</sup>-ABE8e-i8\_linker10 (E932R): [BPSV40-NLS](#), [Nme2Cas9 – delta PID](#), [TadA8e](#), [SmuCas9 PID](#), Linkers

[MKRTADGSEFESPKKKRKV](#)[EDMAAFKPNPINYILGLAIGIASVWAMVEIDEEENPIRLIDLGVRFERAEVPKTGDLSLAMARRLARSVRRRLTRR](#)  
[RAHLLRRARRLLKREGVLQAADFENGLIKSLPNTPWQLRAAALDRKLTPLEWSAVLLHLIKHRGYSQRKNEGETADKELGALLKGVANNAHAL](#)  
[QTGDFRTPAELALNKFEKESGHIRNQRGDYSHTFSRKDLQAEILLFEKQKEFGNPHVSGGLKEGIETLLMTQRPALSGDAVQKMLGHCTFEPAE](#)  
[PKAAKNTYTAERFIWLTKLNNLRILEQGSERPLDTERATLMDEPYRKSCLTYAQARKLLGLEDTAFFKGLRYGKDNAEASTLMEMKAYHAISRAL](#)  
[EKEGLKDKKSPNLNLSSELQDEIGTAFSLFKTDEDITGRLKDRVQPEILEALLKHISFDKFVQISLALRRIVPLMEQ GKRYDEACAEIYGDHYGKKNTE](#)  
[EKIYLPPIPADEIRNPVLRALSQARKVINGVVRRYGSPARIHIETAREVGSFKDRKEIEKRQEENRKDREKAAAKFREYFPNFVGEPSKDILKRLR](#)  
[YEQQHGKCLYSGKEINLVRLEKGYVEIDHALPFSRTWDDSFNNKVLVLGSENQNKGNQTPYEYFNGKDNSREWQEFKARVETSRFPRSKKQRI](#)  
[LLQKFEDEDFKECNLNDRYVNRFLCQFVADHILLTGKGKRRVFNASNGQITNLLRGFWGLRKRVAENDRHHALDAVVACSTVAMQQKITRFV](#)  
[RYKEMNAFDGKTIDKETGKVLHQKTHFPQPWEFFAQEVMIRVFGKPDGKPSGGSGSGSSEVEFSHEYWMRHALTLAKRARDEREVPVGA](#)  
[VLVLNRRVIGEGWNRAIGLHDPTAHAEIMALRQGLVMQNYRLIDATLYVTFEPCVMCAGAMIHSRIGRVVFGVRNSKRGAAASLMNVLNYP](#)  
[GMNHRVEITEGILADECAALLCDFYRMPROVFNAAQKKAQSSIN](#)[ETPGTSESAT](#)[E](#)[F](#)[E](#)[E](#)[A](#)[D](#)[T](#)[P](#)[E](#)[K](#)[L](#)[R](#)[T](#)[L](#)[L](#)[A](#)[E](#)[K](#)[L](#)[S](#)[S](#)[R](#)[P](#)[E](#)[A](#)[V](#)[H](#)[E](#)[Y](#)[V](#)[T](#)[P](#)[L](#)[F](#)[V](#)[S](#)[R](#)[A](#)[P](#)[N](#)[R](#)[K](#)[M](#)  
[SGAHKDTLRSARFVKHNEKISVKRVWLTEIKLADLENMVNYKNGREIELYEALKARLEAYGGNAKQAFDPKDNPFYKGGQLVKAVRVEKTQ](#)  
[R](#)[S](#)[G](#)[V](#)[L](#)[L](#)[N](#)[K](#)[K](#)[N](#)[A](#)[Y](#)[T](#)[I](#)[A](#)[D](#)[N](#)[A](#)[T](#)[M](#)[V](#)[R](#)[V](#)[D](#)[V](#)[Y](#)[T](#)[K](#)[A](#)[G](#)[N](#)[Y](#)[L](#)[V](#)[P](#)[V](#)[Y](#)[V](#)[W](#)[Q](#)[V](#)[A](#)[Q](#)[I](#)[L](#)[P](#)[N](#)[R](#)[A](#)[V](#)[T](#)[S](#)[G](#)[K](#)[S](#)[E](#)[A](#)[D](#)[W](#)[D](#)[L](#)[I](#)[D](#)[E](#)[S](#)[F](#)[E](#)[F](#)[K](#)[F](#)[S](#)[L](#)[S](#)[R](#)[G](#)[D](#)[L](#)[V](#)[E](#)[M](#)[I](#)[S](#)[N](#)[K](#)[G](#)[R](#)[I](#)[F](#)[G](#)[Y](#)[Y](#)[N](#)[G](#)  
[L](#)[D](#)[R](#)[A](#)[N](#)[G](#)[S](#)[I](#)[G](#)[I](#)[R](#)[E](#)[H](#)[D](#)[L](#)[E](#)[K](#)[S](#)[K](#)[G](#)[D](#)[G](#)[V](#)[H](#)[R](#)[V](#)[G](#)[V](#)[K](#)[T](#)[A](#)[T](#)[A](#)[F](#)[N](#)[K](#)[Y](#)[H](#)[V](#)[D](#)[P](#)[L](#)[G](#)[K](#)[E](#)[I](#)[H](#)[R](#)[C](#)[S](#)[S](#)[E](#)[P](#)[R](#)[P](#)[T](#)[L](#)[K](#)[I](#)[K](#)[S](#)[K](#)[E](#)[D](#)[K](#)[R](#)[T](#)[A](#)[D](#)[G](#)[S](#)[E](#)[F](#)[E](#)[P](#)[K](#)[K](#)[R](#)[K](#)[V](#)

[atgaaacggacagccgacggaagcgagttcgagtcaccaagaagaagcggaaagtcgaagat](#)[atggccgcttcaagcctaaccataatcatctgggactggCcatc](#)  
[ggaatcgcatccgtggatgggctatggtggagatcgacgaggaggagaatcctatccggctgatcgatctggcgtgagagtggttagagggccgaggtgcaaagaccggcg](#)  
[attctctggctatggccggagactggcacggagcgtgaggcgcctgacacggagaagggcacacagctctgagggcacgcccgtctgaagagagagggcgtgctgcagg](#)  
[cagcagactctgatgagaatggcctgatcaagagcctgccaacaccccctggcagctgagagcagcccgctggacaggaagctgacaccactggagtggctgcctgctgct](#)  
[gcacctgatcaagcaccgcggtacctgagccagcggagaacgaggagagacagcagacaaggagctggcgccctgctgaaggagtgccaacaatgccacgcccctgc](#)  
[agaccggcgattcaggacacctgcccagctggcctgaataagttgagaaggagtcggccacatcagaaaaccagagggcgactatagccacacctctcccgaaggatctg](#)  
[caggcagctgatcctgcttcgagaagcagaaggattggcaatccacactgagcggaggcctgaaggagggaatcgagaccctgctgatgacacagaggcctgcctgt](#)  
[ccggcgacgcagtgagaagatgctgggacactgcacctgagcctgcagagccaaaggcccaagaacacctacacagccgagcggttatctggctgacaaagctgaaca](#)  
[atctgagaatcctggagcaggatccgagagggcactgaccgacacagagagggccacctgatggatgagcctaccggaagtctaagctgacatatgccaggccagaaagct](#)  
[gctggcctggaggacaccgcttcttaaggcctgagatacggcaaggataatgccaggcctccacactgatggagatgaaggcctatcacgcatctctcgcgcccctggaga](#)  
[aggaggcctgaaggacaagaagtcctccctgaacctgagctccgagctgacagatgagatcggcaccgcttctctgtttagaccgacgaggatcacaggcgcctgaag](#)  
[gacagggcagcctgagatcctggaggcctgctgaagcacatctcttcgataagttgtgagatcagcctgaaggcctgagaaggatcgtgacctgatggagcagggcaa](#)  
[cgggtacgacagggcctgcgcccagatctacggcgatcactatggcaagaagaacacagaggagaagatctatgcccctatccctgcccagcagatcagaaatctgtggtg](#)  
[ctgaggcctgtcccaggcaagaaaagtgatcaacggagtggtgcccgtacggatctccagcccgatccacatcgagaccgcccagagaagtgggcaagagctcaaggac](#)  
[cggaaaggagatcgagaagagacaggaggagaatcgcaaggatcgggagaaggccgcccgaagtttagggagcttccctaacttggggcgagccaaagtcaaggacatc](#)  
[ctgaagctgcgctgtacgagcagcagcagcgaagtgctgtatagcggcaaggagatcaatcgtggtgagcgaagagggctatggagatcgatcacgcccctgcctt](#)  
[ctccagaacctgggacgattctttaacaataagtgctggtgctggcagcagagaaccagaataaggccaatcagacaccatacagatttcaatggcaaggacaactccaggg](#)  
[agtggcaggagttcaaggcccgtggagaccttagatttcccaggagcaagaagcagcggatcctgctgagaagttcgacgaggatggcttaaggagtgcaacctgaatga](#)  
[caccagatacgtgaaccggtcctgtgacagtttggccgatcacatcctgctgaccgcaaggcgaagagaagggttctgcttaatggccagatcacaacctgctgagggg](#)  
[atgggggactgaggaaggtgcccgcagagaatgacagacaccacgactggatgagtggtggtggcatgagcaccgtggcaatcgacgagaagatcacaagattcgtgag](#)  
[gtataaggagatgaacgctttagcggcaagaccatcgataaggagacaggcaagtgctgaccagaagaccacttccccagcctgggagttcttggccaggaagtgatga](#)  
[tccgggtgtcggcaagcagacggcaagccttctggcggttcaggtggatcaggcggtagctctgaggtggagtttcccacgagtagctggatgagacatgcccctgaccctggcca](#)  
[agaggcagcgcgatgagaggaggtgctgtgggagcctgctggtgctgaacaatagatgacggcagggcctggaacagagccatcggcctgacgacccaacagcccag](#)  
[ccgaaattatggccctgagacagggcggcctggtcatgcagaactacagactgattgacgccacctgtacgtgacattcgagccttgcgtgatgtgcggcgccatgatccact](#)  
[ctaggatcggccgctggtgttggcgtgagggaacagcaaacggggcggcaggctccctgatgaactgctgaactacccggcatgaatcaccgctgcaaatcaccaggg](#)  
[aatcctggcagatgaatgtgcccctgctgtgagcttctaccggatgcctagacaggtgtcaatgctcagaagaaggccagagctccatcaacgagacacctggcacaagcg](#)  
[agagcgaaca](#)[gagttgaggaggccgatacccgagaagctgaggacactgctggcagagaagctgctagcaggccagaggcagtgacagtagctgaccctactgttcg](#)  
[tgtccaggccaccaatcggaagatgctggcggccacaaggacacactgagaagcgaagaggttgaagcacaacgagaagatctcctgaaagagagtggtgctgaccg](#)  
[agatcaagctggccgatctggagaacatggtgaattacaagaacggcagggagatcgagctgtataggccctgaaggcaaggctggaggcctacggaggaaatgccaagcag](#)  
[gccttcgacccaaggataaccctttataagaaggaggacagctggtgaaggcctgcccgggtggagaagaccag](#)[CGT](#)[agcggcgtgctgctgaataagaagaacgctac](#)  
[acaatcggc](#)[gacaacgccaccatggtgcccgtgacgtgtacccaaggccggcaagaactacctggttctgtgtacgtgtggcaggtggcccagggcatcttccaaccgccc](#)  
[cgtgaccagcggcaagtccgagcctgactggacctgatcgatgagagcttcagattcaagttctctgtcccggggagatctcgtggaatgatctccaacaggcagaatctt](#)  
[cggctactacaacggcctggacagagccaacggctctattggaattagagagcagcagcctagagaagagcaaggcgaagacggcgtgcatagagtgaggagtgaaaacagcta](#)  
[cagcatttaacaagtagaccctggatcccctgggcaagagatccacagatgagcagcgaaccagacctactgaaaatcaagctcagaaggaggat](#)[aaaagaaccgccc](#)  
[acggcagcgaattcgagccaagaagaaggaaagtc](#)

Nme2<sup>Smu</sup>-ABE8e-i8\_linker10 (D56R): [BPSV40-NLS](#), [Nme2Cas9 – delta PID](#), [TadA8e](#), [SmuCas9 PID](#), Linkers

[MKRTADGSEFESPKKKRKV](#)[EDMAAFKPNPINYILGLAIGIASVGWAMVEIDEEENPIRLIDLGVRFERAEVPKTR](#)[RSLAMARRLARSVRRLTRR](#)  
[RAHLLRRARRLLKREGVLQAADFENGLIKSLPNTPWQLRAAALDRKLTPLEWSAVLLHLIKHRGYSQRKNEGETADKELGALLKGVANNAHAL](#)  
[QTGDFRTPAELALNKFEKESGHIRNQRGDYSHTFSRKDLQAEILLFEKQKEFGNPHVSGGLKEGIETLLMTQRPALSGDAVQKMLGHCTFEPAE](#)  
[PKAAKNTYTAERFIWLTKLNNLRILEQGSERPLDTERATLMDEPYRKSCLTYAQARKLLGLEDTAFFKGLRYGKDNAEASTLMEMKAYHAISRAL](#)  
[EKEGLKDKKSPNLNLSSELQDEIGTAFSLFKTDEDITGRLKDRVQPEILEALLKHISFDKFVQISLALRRIVPLMEQ GKRYDEACAEIYGDHYGKKNTE](#)  
[EKIYLPPIPADEIRNPVLRALSQARKVINGVVRRYGSPARIHIETAREVGSFKDRKEIEKRQEENRKDREKAAAKFREYFPNFVGEPSKDILKLRL](#)  
[YEQQHGKCLYSGKEINLVRLEKGYVEIDHALPFSRTWDDSFNNKVLVLGSENQNKGNQTPYEYFNGKDNSREWQEFKARVETSRFPRSKQRI](#)  
[LLQKFDDEDGFKECNLNDRYVNRFLCQFVADHILLTGKGKRRVFNASNGQITNLLRGFWGLRKRVAENDRHHALDAVVACSTVAMQQKITRFV](#)  
[RYKEMNAFDGKTIDKETGKVLHQKTHFPQPWEFFAQEVMIRVFGKPDGKPSGSGSGSGSSEVEFSHEYWMRHALTLAKRARDEREVPVGA](#)  
[VLVLNNRVIGEGWNRAIGLHDPTAHAEIMALRQGLVMQNYRLIDATLYVTFEPCVMCAGAMIHSRIGRVVFGVRNSKRGAAASLMNVLNYP](#)  
[GMNHRVEITEGILADECAALLCDFYRMPROVFNAQKKAQSSIN](#)[ETPGTSESAT](#)[E](#)[FEEADTPEKLR](#)[TLLAEKLSRPEAVHEYV](#)[TPLFVSRAPNRKM](#)  
[SGAHKDLRSARFVKHNEKISVSRVWLTEIKLADLENMVNYKNGREIELYEALKARLEAYGGNAKQAFDPKDNPFYKGGQLVKA](#)[RVEKTQE](#)  
[SGVLLNKKNAYTIA](#)[DNATMVRVDVYTKAGKNYLVVYVWQVAQGLPNRAVTS](#)[GKSEADWDLIDESFEFKLSRGLVEMISNKGRI](#)[FGYYNG](#)  
[LDRANGSIGIREHDLEKSKGKDGVRVGVKTATAFNKYHVDPLGKEIHRCSSEPRPTLKIKSKK](#)[EDKRTADGSEFEPKKKRKV](#)

[atgaaacggacagccgacggaagcgagttcgagtcaccaagaagaagcggaaagtcgaagat](#)[atggccgcttcaagcctaacc](#)[caatcaattacatcctgggactggCcatc](#)  
[ggaatcgcatccgtgggatgggctatggtggagatcgacgaggaggagaatcctatccggctgatcgatctggcgtgagagtggttagagagggccgaggtgcaaagaccggc](#)  
[GTtctctgctatggccggagactggcagggagcgtgaggcgctgacacggagaaggccacacaggctgctgagggcacgcccgtgctgaagagagagggcgtgctgcag](#)  
[gcagcagacttcgatgagaatggcctgatcaagagcctccaaaacccccctggcagctgagagcagccgctggacaggaagctgacaccactggagtgctgctgctgc](#)  
[tgcacctgatcaagcaccgcccgtacctgagccagcgggaagaacagggagagacagcagacaaggagctggcgccctgctgaagggagtgccaacaatgccacgcccctg](#)  
[cagaccggcgattcaggacacctgcccagctggcctgaataagttgagaaggagtcggccacatcagaacacagagggcgactatagccacacctctcccgaagatct](#)  
[gcaggccgagctgatcctgctgttcgagaagcagaaggagttggcaatccacacgtgagcggagcctgaaggagggaatcgagacctgctgatcacagaggcctgcccctg](#)  
[tccggcgacgcagtgcaagatgctgggacactgcaccttcgagcctgcagagccaaagggcccaagaacacctacacagccgagcggtttatctggctgacaaagctgaaca](#)  
[atctgagaatcctggagcaggatccgagagggcactgaccgacacagagagggccacctgatggatgagcctaccggaagtctaagctgacatatgccaggccagaaagct](#)  
[gctggcctggagacacgccttcttaagggcctgagatacggcaaggataatgccaggcctccacactgatggagatgaaggcctatcacgccatctctcgcgcccctggaga](#)  
[aggagggcctgaaggacaagaagtcccccctgaacctgagctccgagctgcaggatgagatcggcaccgcttctctgtttaaagaccgacgaggatcacagggcgcctgaag](#)  
[gacagggcgcagcctgagatcctggaggccctgctgaagcacatctcttcgataagttgtgagatcagcctgaaggccctgagaaggatcgtgacctgatggagcagggcaa](#)  
[cgggtacgacagggcctgcccagatctacggcgatcactatggcaagaagaacacagaggagaagatctatgccccctatccctgcccagcagatcagaaatcctgtggtg](#)  
[ctgagggcctgtcccaggcaagaaaagtgatcaacggagtggtgcccgtacggatctccagcccgatccacatcgagaccgccaagagaagtgggcaagagctcaaggac](#)  
[cggaaaggagatcgagaagagacaggaggagaatcgcaaggatcgggagaaggccgcccgaagttagggagcttccctaacttggggcgagccaaagtcaaggacatc](#)  
[ctgaagctgcccgtgacgagcagcagcagcgaagtgtctgtatagcggcaaggagatcaatcgtggtgcccgaagcagagagggctatggagatcgatcacgcccctgcttt](#)  
[ctccagaacctgggacgattctttaacaataaggtgctggtgctggcagcagagaaccagaataagggcaatcagacaccatacagatttcaatggcaaggacaactccaggg](#)  
[agtggcaggagttcaaggcccgtggagaccttagatttcccaggagcaagaagcagcggatcctgctgcagaagttcgacgaggatggcttaaggagtgcaacctgaatga](#)  
[caccagatacgtgaaccggtcctgtgcccagttgtggccgatcacatcctgctgaccgcaaggcgaagagaagggttctgcttaatggccagatcacaacctgctgagggg](#)  
[atgttgggactgaggaaggtgcccgcagagaatgacagacaccacgactggatgagtggtggtggcatgacaccctggcaatcgacgagaagatcacaagattcgtgag](#)  
[gtataaggagatgaacgctttgacggcaagaccatcgataaggagacaggcaagtgctgaccagaagaccacttccccagcctgggagttctttgccaggaagtgatga](#)  
[tccgggtgttcggcaagcagacggcaagccttctggcggttcaggtggatcaggcggtagctctgaggtggagtttcccacgagtactggatgagacatgcccctgaccctggcca](#)  
[agagggcacgcatgagagggaggtgctgtggagccgtgctggtgctgaacaatagagtgatcggcagggcctggaacagagccatcggcctgcacgaccaacagcccattg](#)  
[ccgaaattatggccctgagacagggcggcctggtcatgcagaactacagactgattgacgccacctgtacgtgacattcgagccttgcgtgatgtgcggcgccatgatccact](#)  
[ctaggatcggccgctggtgtttggcgtgagggaacagcaaacggggcggcaggctcccctgatgaactgctgaactacccggcatgaatcaccgctgcaaatcaccagggg](#)  
[aatcctggcagatgaatgtgcccctgctgtgagcttctaccggatgcctagacaggtgtcaatgctcagaagaaggccagagctccatcaacgagacacctggcacaagcg](#)  
[agagcgcaaca](#)[gagtttaggagcggataccccagagaagctgaggacactgctggcagagaagctgctagcaggccagagcagtcacgagta](#)[cgtgaccctactgtc](#)  
[gtccagggcacccaatcggaagatgtctggcggccacaaggacacactgagaagcgaagaggttgaagcacaacgagaagatctcctgaagagagtggtgctgaccg](#)  
[agatcaagctggccgatctggagaacatggtgaattacaagaacggcagggagatcgagctgtataggccctgaaggcaaggctggaggcctacggaggaatgccaagcag](#)  
[gccttcgacccaaaggataaccctttataagaaggaggacagctggtgaaggcctgcccgtggagaagaccaggagagcggcgtgctgctgaataagaagaacgctac](#)  
[acaatcggc](#)[gacaacgccaccatggtgcccgtggactgtacccaaggccggcaagaactacctggttctgtgtacgtgtggcaggtggcccagggcatcttccaaccgccc](#)  
[cgtgaccagcggcaagtccgagcctgactggacctgatcgatgagagcttcagattcaagttctctgtcccggggagatctcgtggaatgatctccaacaggcagaatctt](#)  
[cggctactacaacggcctggacagagccaacggctctattggaattagagagcagcagcctagagaagagcaagggcaagacggcgtgcatagagtgaggagtgaaaacagcta](#)  
[cagcatttaacaagtagaccctggatcccctgggcaagagatccacagatgcagcagcgaaccagacctactgaaaatcaagctcagaaggaggat](#)[aaaagaaccgccc](#)  
[acggcagcgaattcgagccaagaagaaggaaagtc](#)

iNme2-ABE8e-nt: [BPSV40-NLS](#), [nNme2Cas9](#), [TadA8e](#), Linkers

Jenifer Dounda Lab, iNme2Cas9 (D16A) variant in n-terminally fused ABE8e format.

[MKRTADGSEFESPKKKRKV](#)[GGSGGGSGGGSG](#)[SEVEFSHEYWMRHALTLAKRARDEREVPVGA](#)[VLLNRRVIGEGWNRAIGLHDPTAHAEIM](#)  
[ALRQGLVMQNYRLIDATLYVTFEPCVMCAGAMIHSRIGRVVFGVRNSKRGAA](#)[GLMNVLNYPGMNHRVEITEGILADECAALLCDFYRMPR](#)  
[QVFNAQKKAQSSINS](#)[SGSSSGSSGSETPGTSESATPESSGSSGGS](#)[MAAFKPNPINYILGLAIGIASVGMAMVEIDEENPIRLIDL](#)[GVRVFERAE](#)  
[VPKTGDSLAMARRLARSVRRLTRRAHRLLRARLLKREGVLQAADFENGLIKSLPNTPWQLRAALDRKLT](#)[PLEWSAVLLHLIKHRGYLSQRK](#)  
[NEGETADKELGALLKGVANNAHALQTGDFRTPAELALNKFEKESGHIRNQRGDYSHTFSRKDLQAE](#)[LILLFEKQKQKFGNPHVSGGLKEGIETLLM](#)  
[TQRPALSGDAVQKMLGHCTFEPAPKAAKNTYAERFIWLTKLNNLRILEQGSERPLDTERATLMDEPYR](#)[SKLTYAQARKLLGLED](#)[TAFFKGL](#)  
[RYGKDNAEASTLMEKAYHAISRALEKEGLKDKSPLNLSSELQDEIGTAFSLFKTDEDITGRLKDRVQ](#)[PEILEALLKHISFDKFVQISLKALRRIVPL](#)  
[MEQGKRYDEACAEIYGDHYGKKNTEEKIYLPPIPADEIRNPVLRALSQARKVINGVRRYRYS](#)[PARIHIETAREV](#)[GKSFKDRKEIEKROENRKDRE](#)  
[KAAAKFREYFPNFVGEPSKIDILRLRYEQHQKCLYSKKEINLRLNEKGYVEIDHALPFSRTWDD](#)[SFNNKVLVLGSENQKNGNQTPYEYFNGK](#)  
[DNSREWQEFKARVETSRFPRSKQRILLQKFDGDFKECNLNDTRYVNRFLCQFVADHILLTGK](#)[GKRRVFN](#)[SNGQITNLLRGFWGLR](#)[KRVRAEND](#)  
[RHHALDAVVVACSTVAMQQKITRFVRYKEMNAFDGKTIDKETGKVLHQKTHFPQPWEFFAQE](#)[VMIRVFGKPDGKPEFEADTPEKLR](#)[TLLAEK](#)  
[LSSRPEAVHEVYVTPFVSRAPNRKMSGAHKGLRSKRFRVKNHEKISVKRVWLT](#)[KIRLAALENMVNYKNGREI](#)[ELYEALKARLEAYGGNAKQAFD](#)  
[PKGPNFYKKGQLVKA](#)[RVERTQKSGVLLNKKNAYTIADNGDMVRVDV](#)[FCKVDKKGKNQYFIVPIYAWQVAENIL](#)[PDIDCKGYRIDDSYTFCS](#)  
[LHKYDLIAFQKDEKSKVEFAYYINCDSSNGRFLAWHDKGSKEQQRISTQNLVLIQYQVNEL](#)[KPAIRPRLKRPVRE](#)[EDKRTADGSEFEPKKK](#)  
[RKV](#)

[atgaaacggacagccgacggaagcgagttcgagtcaccaagaagaagcggaaagtcggcggtagcggcggaggcagcggtagcggcggcagcggcctgaggtgaggtttccca](#)  
[cgagtactggatgagacatgcctgaccctggccaagagggcacgcgatgagagggaggtgctgtgggagcctgctgtgctgaacaatagagtgatcggcgagggctggaa](#)  
[cagagccatcggcctgcagaccaacagcccatgccgaaattatggcctgagacagggcggcctggtcatgcagaactacagactgattgacgccacctgtacgtgacattcg](#)  
[agccttgcgtgatgtgcccggcgccatgatccactctaggatcgcccgctggtgtttggcgtgaggaacagcaaacggggcgccgaggctccctgatgaactgctgaactac](#)  
[cccggcatgaatcaccgcctgcaaataccgaggggaatcctggcagatgaatgtgcccctgctgtgagacttaccggatgcttagacaggtgttcaatgctcagaagaagggc](#)  
[cagagctccatcaactccggaggatctagcggaggtcctctggctctgagacacctggcacaagcgagagcgcaaacctgaaagcagcgggggagcagcggggggtcaatg](#)  
[ggcgcctcaagcctaaccaatcaattacatcctgggactggccatcggaaatcgatcctgggagtgaggctatggtggagatcgacgaggaggagaatcctatccggctgatcgat](#)  
[ctggcgctgagagtggtttagagggccgaggtgcaaacaccggcgattctctggctatggccggagactggcacggagcgtgaggcgctgacacggagaagggcacacagg](#)  
[ctgctgagggcacgccgctgctgaagagagagggcgctgctgacggcagcagacttctgatgagaatggcctgatcaagagcctgccaacacccccctggcagctgagagcagcc](#)  
[gcccctggacaggaagctgacaccactggagtggtctgccgtgctgctgcacctgatcaagcaccgcgctacctgagccagcggaagaacgagggagagacagcagacaaggag](#)  
[ctggcgccctgctgaagggagtgccaacaatgccacgcccctgcagaccggcattcaggacacctgccgagctggccctgaataagttgagaaggagtcggccacatca](#)  
[gaaaccagagggcgactatagccacaccttctcccgaaggatctgcagggcgagctgatcctgcttgcagaagcagaaggagttggcaatccacacgtgagcggaggcct](#)  
[gaaggaggaatcgagaccctgctgatgacacagaggcctgccctgcccggcagcagctgcagaagatgctgggacactgcacctctgagcctgagagccaaaggccgcca](#)  
[gaacacctacacagcggcggtttatctggctgacaagctgaacaatctgagaatcctggagcaggatccgagagccactgaccgacacagagagggccaccctgatggat](#)  
[gagccttaccggaagtctaagctgacatatgccaggccagaaaagctgctggcctggaggacaccgcttcttaaggcctgagatacggcaaggataatgcccaggcctccac](#)  
[actgatggagatgaaggcctatcacgccatctctcgccctggagaaggaggcctgaaggacaagaatccccctgaaactgagctccgagctgacagatgagatcgccacc](#)  
[gccttctctgtttaagaccgacgaggatatcacaggccgctgaaggacagggcagcctgagatcctggaggccctgctgaagcacatctcttcgataagtttctgagatca](#)  
[gcctgaaggccctgagaaggatcgtgccactgatggagcagggcaagcggtacgacagggcctgcgcccagatctacggcagatcactatggcaagaagaacacagaggagaag](#)  
[atctatctgccccctatccctgccagagatcagaatcctgtgtgctgagggccctgtcccaggcaagaaaagtgatcaacggagtggtgcccggatcggatctccagcccgg](#)  
[atccacatcgagaccgagagaagtggaagagctcaaggaccggaaggagatcgagaagagacagggagagaatcgcaaggatcgggagaagggccgccaagttta](#)  
[gggagacttccctaacttggggcagcgaagctcaaggacatcctgaagctgcgctgtacgagcagcagcagcggcaagtgctgtatagcggcaaggagatcaatctggtg](#)  
[cggctgaacgagaagggctatgtggagatgatcacgccctgccttctccagaacctgggacgattctttaacaataaggtgctggtgctgggcagcgagaaccagaataaggg](#)  
[caatcagacaccatacagatattcaatggcaaggacaactcagggagtgaggagttcaaggcccgtggagaccttagatttccaggagcaagaagcagcggatcctg](#)  
[ctgcagaagttcgacgaggatggcttaaggagtgcaacctgaatgacaccagatacgtgaaccggtcctgtgccaagtttggccgatcacatcctgctgaccggcaagggcaag](#)  
[agaagggtgttcgctctaatggccagatcacaacctgctgaggggattttggggactgaggaaggtcggggcagagaatgacagacaccacgcactggatgagtggtggtg](#)  
[catgcagcaccgtggcaatgacgagaagatcacaagattcgtgaggtataaggagatgaacgctttgacggcaagaccatcgataaggagacaggaaggtgctgaccaga](#)  
[agaccacttccccagcctgggagttcttggccaggaagtgatgatccgggtgtcggcaagccagacggcaagcctgagttgaggaggccgataccccagagaagctgagg](#)  
[aactgctggcagagaagctgctagcaggccagagcagtgacagagtagtaccctgctgctgacgggacccaatcggaagatgctgcccggccacaaggccacac](#)  
[tgagaagcggcaagaggtttgtgaagcacaagagaagatcctggaagagagtggtgctgaccaagatcaggctggccgcccctggagaacatggtgaattacaagaacggca](#)  
[gggagatcgagctgatgaggccctgaaggcaaggtgaggcctcaggaggaaatgccaagcaggcctcgacccaaggcgaaccctttataagaaggaggagcagctgg](#)  
[tgaaggcctgcccgtggagaggaccagaagagcggcgtgctgctgaataagaagaacgctacacaatcgccgacaatggcgatatggtgagagtgagctgttctgtaaggt](#)  
[ggataagaagggcaagaatcagttatctgctcctatctatgctggcaggtggccgagaacatcctgacagatcagttgcaagggtacagaatcgacgatagctatacatt](#)  
[ctgttttccctgcacaagtatgacctgatgccttccagaaggatgagaagtcgaaggtggagtttgctactatatacaattgcgactccttaacggcaggttctactctggcctggca](#)  
[cgataaggcagcaaggagcagcagtttcgatctccaccagaatctggtgctgatccagaagatcagggtgaacgagctgggcaaggagatcaggccatgctcggtgagaaga](#)  
[cgcccaccgtgcccggagat](#)[aaagaaccgcccagcgcagcgaattcgagccaagaagaaggaaagtc](#)



iNme2<sup>Smu</sup>-ABE8e-nt: [BPSV40-NLS](#), [Nme2Cas9 – delta PID](#), [TadA8e](#), [SmuCas9 PID](#), Linkers

Jenifer Dounda Lab, iNme2Cas9 (D16A) variant with SmuCas9 PID swap in n-terminally fused ABE8e format

[MKRTADGSEFESPKKKRKV](#)[GGSGGGSGGGSGSEVFEFSHEYWMRHALTLAKRARDEREVPVGA VLVLNRRVIGEGWNRAIGLHDPTAHAEIM](#)  
[ALRQGLVMQNYRLIDATLYVTFEPCVMCAGAMIHSRIGRVVFGVRNSKRGAAASLMNVLNYPGMNHRVEITEGILADECAALLCDFYRMPR](#)  
[QVFNAQKKAQSSINSGSSSGSSGSETPGTSESATPESSGSSSGS](#)[MAAFKPNPINYILGLAIGIASVGMAMVEIDEENPIRLIDLGVRFERAE](#)  
[VPKTGDSLAMARRLARSVRRLLTRRAHRLLRARLLKREGVLQAADFENGLIKSLPNTPWQLRAALDRKLTPLEWSAVLLHLIKHRGYLSQRK](#)  
[NEGETADKELGALLKGVANNAHALQTGDFRTPAELALNKFEKESGHIRNQRGDYSHTFSRKDLQAEILLFEKQKQKFGNPHVSGGLKEGIETLLM](#)  
[TQRPALSGDAVQKMLGHCTFEPAPKAAKNTYAERFIWLTKLNNLRILEQGSERPLDTERATLMDEPYRKSCLTYAQARKLLGLEDTAFFKGL](#)  
[RYGKDNAEASTLMEMKAYHAISRALEKEGLKDKKSPLNLSSELQDEIGTAFSLFKTDEDITGRLKDRVQPEILEALLKHISFDKFVQISLKALRRIVPL](#)  
[MEQGKRYDEACAEIYGDHYGKKNTEEKIYLPPIPADEIRNPVLRALSQARKVINGVRRYRYSRARIHIETAREVGSFKDRKEIEKROENRDKRE](#)  
[KAAAKFREYFPNFVGEPSKIDILRLRYEQHQKCLYSKKEINLRLNEKGYVEIDHALPFSRTWDDSFNNKVLVLGSENQKNGNQTPYEYFNGK](#)  
[DNSREWQEFKARVETSRFPRSKQRILLQKFDDEDFKECNLNDTRYVNRFLCQFVADHILLTGKGRRVFASNGQITNLLRGFWGLRKVRAEND](#)  
[RHHALDAVVVACSTVAMQQKITRFVRYKEMNAFDGKTIDKETGKVLHQKTHFPQPWEFFAQEVMIRVFGKPDGKPEFEADTPEKLRLLAEK](#)  
[LSSRPEAVHEYVTPLFVSRAPNRKMSGAHKGLRSKRFRVKNHEKISVKRVWLTKIRLAALENMVNYKNGREIELYEALKARLEAYGGNAKQAFD](#)  
[PKGNPFYKKGQLVKAVERVETQKSGVLLNKKNAYTIA](#)[DNATMVRVDVYTKAGKNYLPVYVWQVAQGILPNRAVTSKGSEADWDLIDESFE](#)  
[FKFLSRGDLVEMISNKGRIFGYNGLDRANGSIGIREHDLEKSKGKGDVHRVGVKTATAFNKYHVDPLGKEIHRCSSEPRPTLKIKSKE](#)[DKRTA](#)  
[DGSEFEPKKKKRKV](#)

[atgaaacggacagccgacggaagcgagttcgagtcaccaaagaagaagcggaaagtcggcgtagcggcggaggcagcggtagcggcgagcggcctgaggtggagtttccca](#)  
[cgagtactggatgagacatgcctgaccctggccaagagggcacgcgatgagagggaggtgctgtgggagcctgctggtgctgaacaatagagtgatcggcgagggctggaa](#)  
[cagagccatcggcctgcacgaccaacagcccatgccgaaattatggcctgagacagggcggcctggtcatgcagaactacagactgattgacgccacctgtacgtgacattcg](#)  
[agccttgcgtgatgtgcccggcgccatgatccactctaggatcgcccgctggtgtttggcgtgaggaacagcaaacggggcggcaggctccctgatgaactgctgaactac](#)  
[cccggcatgaatcaccgcgtgaaattaccgaggggaatcctggcagatgaatgtgccgcctgctgtgcgacttctaccggatgcttagacaggtgttcaatgctcagaagaagggc](#)  
[cagagctccatcaactccggagatctagcggaggtcctctggctctgagacacctggcacaagcgagagcgcaacacctgaaagcagcgggggagcagcggggggtcaatg](#)  
[ggcgcctcaagcctaaccaatcaattacatcctgggactggccatcggaaatcgatcctgggagtggtgatgagatcgacgaggaggagaatcctatccggctgatcgat](#)  
[ctggcgctgagagtggtttagagggccgaggtgcaaacaccggcgattctctggctatggccggagactggcacggagcgtgaggcgctgacacgggagaagggcacacagg](#)  
[ctgctgagggcacgccgctgctgaagagagagggcgtgctgacggcagcagacttctgatgagaatggcctgatcaagagcctgccaacacccccctggcagctgagagcagcc](#)  
[gacctggacaggaagctgacaccactggagtggtctgccgtgctgctgcacctgatcaagcaccgcggtacctgagccagcggagaagaacgagggagagacagcagacaaggag](#)  
[ctggcgccctgctgaagggagtgccaacaatgccacgacctgcagaccggcattcaggacacctgcccagctggcctgaataagtttgagaaggagtcggccacatca](#)  
[gaaaccagagggcgactatagccacaccttctcccgaaggatctgcagggcagctgatcctgcttgcagaagcagaaggagttggcaatccacacgtgagcggaggcct](#)  
[gaaggaggaatcgagaccctgctgatgacacagaggcctgccctgctccggcagcagctgcagaagatgctgggacactgcacctctgagcctgagagccaaaggccgcca](#)  
[gaacacctacacagcggagcggttattctggctgacaagctgaacaatctgagaatctggagcaggatccgagagccactgaccgacacagagagggccaccctgatggat](#)  
[gagccttaccggaagttaagctgacatatgccaggccagaaaagctgctggcctggaggacaccgcttcttaaggcctgagatacggcaaggataatgcccagcctccac](#)  
[actgatggagatgaaggcctatcacgccatctctcggcctggagaaggaggcctgaaggacaagaatccccctgaaactgagctccgagctgacagatgagatcgccacc](#)  
[gccttctctgtttaagaccgacgaggatatcacaggccgctgaaggacagggcagcctgagatcctggaggccctgctgaagcacatctcttcgataagtttgtagatca](#)  
[gcctgaaggccctgagaaggatcgtgccactgatggagcagggcaagcggtacgacagggcctgcgccagatctacggcagatcactatggcaagaagaacacagaggagaag](#)  
[atctatctgccccctatccctgccagagatcagaatcctgtgtgctgagggccctgtcccaggcaagaaaagtgatcaacggagtggtgcccggtagcctcagcccgg](#)  
[atccacatcgagaccgagagaagtggaagagctcaaggaccggaaggagatcgagaagagacaggaggagaatcgcaaggatcgggagaagggccgccaagtta](#)  
[gggagtagtctccctaacttggggcagcgaagctcaaggacatctgaagctgcgctgtacgagcagcagcagcggcaagtgctgtatagcggcaaggagatcaatctggtg](#)  
[cggctgaacgagaagggctatgtggagatgatcacgccctgcttctccagaacctgggacgattctttaacaataagtgctggtgctgggacgagagaaccagaataaggg](#)  
[caatcagaccatacagatattcaatggcaaggacaactcaggagtgccaggttcaggagttcaaggcccgtggagaccttagatttccaggagcaagaagcagcggatcctg](#)  
[ctgcagaagttcgacgaggatggcttaaggagtgcaacctgaatgacaccagatacgtgaaccggtcctgtgtagcttggccgatcacatcctgctgaccggcaagggcaag](#)  
[agaagggtgttcgctctaattggccagatcacaacctgctgaggggattttggggactgaggaaggtgcccggcagagaatgacagacaccacgactggatgagtggtggtg](#)  
[catgcagcaccgtggcaatgacgagaagatcacaagattcgtgaggtataaggagatgaacgctttgacggcaagaccatcgataaggagacaggaaggtgctgaccaga](#)  
[agaccacttccccagcctgggagttcttggccaggaagtgatgatccgggtgtcggcaagccagacggcaagcctgagttgaggaggccgataccccagagaagctgagg](#)  
[aactgctggcagagaagctgctagcaggccagagcagtgacagtagctgaccccactgtctgtccagggacccaatcggaagatgctgcccaccacaaggccacac](#)  
[tgagaagcggcaagaggtttgtgaagcacaagagaagatcctggaagagagtggtgctgaccaagatcaggctggccgctggagaacctggtgaattacaagaacggca](#)  
[gggagatcgagctgatgaggccctgaaggcaaggtgaggcctcaggaggaaatgccaagcaggcctgacccaaggcgaaccctttataagaaggaggacagctgg](#)  
[tgaaggcctgcccgtggagaggaccagaagagcggcgtgctgctgaataagaagaacgctacacaatcgccgacaacgccaccatggtgcccgtggagctgtacaccaagg](#)  
[ccggcaagaactacctggttctgtgtagctgtggcaggtggcccagggcatcttaccacaccgcccgtgaccagcggcaagtcaggagctgactgggacctgatgatgagagc](#)  
[ttcgattcaagttctctgtcccggggagatctcgtggaatgatctccaacaaggccagaatcttggctactacaacggcctggacagagccaacggccttattggaattagag](#)  
[gcacgacctagagaagagcaagggcaagagcggcgtgcatagagtgaggagtgaaacagctacagcatttaacaagtaccacgtggatccctgggcaagagatccacaga](#)  
[tgcagcagcaaccagacctacactgaaaatcaagttaagaaggagataaaagaaccgcccagcggcagcgaattcagcccaagaagaagaggaaagtc](#)

**Nucleotide and amino acid sequences of deaminase linkers used in this study and their orientation with *n*Cas9 domains.**

**Nme2<sup>Smu</sup>-ABE8e-i1 (WT):** [BPSV40-NLS](#), [Nme2Cas9 – delta PID](#), [TadA8e](#), [SmuCas9 PID](#), [Deaminase Flanking Linkers](#)

[MKRTADGSEFESPKKKRKV](#)[EDMAAFKPNP](#)[INYLGLAIGIASV](#)[GWAMVEIDEEENPIRLIDL](#)[GVRVFERAEV](#)[PKTGDSLAMARRLARS](#)[VRRRLTRRR](#)[RAHRLRLRARLLK](#)[REGVLQAADF](#)[ENGLIKSLP](#)[NTPWQLRAAALDR](#)[KLTPLEWSAVLLHLI](#)[KHRGYLSQRKNE](#)[GETADKELGALLK](#)[GVANNAHALQT](#)[GDFRTPAELALN](#)[KFEKESGHIRN](#)[QRGDYSHTFSR](#)[KDLQAEILLF](#)[EKQKEFGN](#)[PHVSGGLKEG](#)[IETLLMTQRP](#)[ALSGDAVQKML](#)[GHCTFEPAEP](#)[KAAKNTYAER](#)[FIWLTCLNLR](#)[ILEQ\(N\\_Linker\)](#)[SEVEFSHE](#)[YWMRHALTL](#)[AKRARDERE](#)[VPGAVLVLN](#)[NRVIGEG](#)[WNRAIGLHD](#)[PTAHAEIMALR](#)[QGGLVMQNYR](#)[LIDATLYVTF](#)[EPCVMCAGAM](#)[IHSRIGRV](#)[VFGVRNSK](#)[RGAAGSLM](#)[NVLNYPGM](#)[NHRVEITE](#)[GILADECA](#)[ALLCDFYR](#)[MPLRQVF](#)[NAQKKAQSSIN\(C\\_Linker\)](#)[GSERPLT](#)[DTERATLM](#)[DEPYRKS](#)[KLYAQAR](#)[KLLGLEDT](#)[AFFKGLR](#)[YGKDN](#)[AEASTLM](#)[EMKAYH](#)[AISRALE](#)[KEGLKDK](#)[KSPNL](#)[SSELQ](#)[DEIGTAF](#)[SLFKT](#)[DEDITGR](#)[LKDRVQ](#)[PEILEALL](#)[KHISFD](#)[KLVQISL](#)[KALRRIV](#)[PLMEQ](#)[GKRYDE](#)[ACAEI](#)[YGDHY](#)[GKNTE](#)[EKIYL](#)[PPIPA](#)[DEIRNP](#)[VLRALS](#)[QARKVIN](#)[GSPARI](#)[HETARE](#)[VYKSF](#)[KDRKEI](#)[EKRQEN](#)[RKDREK](#)[AAAKF](#)[REYFP](#)[NFVGE](#)[PKSKD](#)[ILKRL](#)[RYEQ](#)[HGKCL](#)[YSGKE](#)[INLVR](#)[LNEK](#)[YVEID](#)[HALP](#)[FSRT](#)[WDDSF](#)[NKNK](#)[VVLG](#)[SENQ](#)[NKNQ](#)[TPYE](#)[YFNG](#)[KDNS](#)[REWQ](#)[EFKAR](#)[VTSR](#)[FPRS](#)[KQRI](#)[LLQK](#)[FDE](#)[DGFK](#)[ECNL](#)[NDTRY](#)[VNR](#)[FLCQ](#)[FVAD](#)[HILLT](#)[GKGR](#)[RVFAS](#)[NGQIT](#)[NLLR](#)[GFWG](#)[LKVRA](#)[ENDRH](#)[HALDA](#)[VAVV](#)[ACST](#)[VAMQ](#)[QKITR](#)[FVRY](#)[KEMN](#)[AFDG](#)[KTDI](#)[KETG](#)[KVLH](#)[QKTH](#)[FPQP](#)[WEFFA](#)[QEV](#)[MIRV](#)[FGK](#)[PDGK](#)[PFE](#)[EADT](#)[PEKLR](#)[TLA](#)[EKLS](#)[SRPE](#)[AVHE](#)[YVTP](#)[LFSR](#)[APNR](#)[KMSG](#)[AHKD](#)[TLRS](#)[AKRF](#)[VKH](#)[NEKIS](#)[VKR](#)[VWLT](#)[EIKL](#)[ADLE](#)[NMV](#)[NYK](#)[NGREI](#)[LYEAL](#)[KARLE](#)[AYG](#)[GNAK](#)[QAFD](#)[PKDN](#)[PFYK](#)[GGQ](#)[LVKA](#)[VRVE](#)[KTQ](#)[ESG](#)[VLLN](#)[KNAY](#)[TIAN](#)[DNAT](#)[MVR](#)[VDVY](#)[TKAG](#)[KNYL](#)[VPVY](#)[WQVA](#)[QGIL](#)[PNRA](#)[VTSG](#)[KSEAD](#)[WDLI](#)[DESFE](#)[FKF](#)[LSR](#)[GDLV](#)[EMIS](#)[NKGR](#)[IFGY](#)[NGLD](#)[RANG](#)[SIGIR](#)[EHD](#)[LEK](#)[SKG](#)[KDG](#)[VHR](#)[VGVT](#)[ATAF](#)[NKYH](#)[VDPL](#)[GKEI](#)[HRC](#)[SSE](#)[PRPT](#)[LKIK](#)[SKKED](#)[KRTAD](#)[GSE](#)[FEP](#)[K](#)[K](#)[R](#)[K](#)[V](#)

**Nme2<sup>Smu</sup>-ABE8e-i8 (WT):** [BPSV40-NLS](#), [Nme2Cas9 – delta PID](#), [TadA8e](#), [SmuCas9 PID](#), [Deaminase Flanking Linkers](#)

[MKRTADGSEFESPKKKRKV](#)[EDMAAFKPNP](#)[INYLGLAIGIASV](#)[GWAMVEIDEEENPIRLIDL](#)[GVRVFERAEV](#)[PKTGDSLAMARRLARS](#)[VRRRLTRRR](#)[RAHRLRLRARLLK](#)[REGVLQAADF](#)[ENGLIKSLP](#)[NTPWQLRAAALDR](#)[KLTPLEWSAVLLHLI](#)[KHRGYLSQRKNE](#)[GETADKELGALLK](#)[GVANNAHALQT](#)[GDFRTPAELALN](#)[KFEKESGHIRN](#)[QRGDYSHTFSR](#)[KDLQAEILLF](#)[EKQKEFGN](#)[PHVSGGLKEG](#)[IETLLMTQRP](#)[ALSGDAVQKML](#)[GHCTFEPAEP](#)[KAAKNTYAER](#)[FIWLTCLNLR](#)[ILEQ\(N\\_Linker\)](#)[SEVEFSHE](#)[YWMRHALTL](#)[AKRARDERE](#)[VPGAVLVLN](#)[NRVIGEG](#)[WNRAIGLHD](#)[PTAHAEIMALR](#)[QGGLVMQNYR](#)[LIDATLYVTF](#)[EPCVMCAGAM](#)[IHSRIGRV](#)[VFGVRNSK](#)[RGAAGSLM](#)[NVLNYPGM](#)[NHRVEITE](#)[GILADECA](#)[ALLCDFYR](#)[MPLRQVF](#)[NAQKKAQSSIN\(C\\_Linker\)](#)[EFEEADT](#)[PEKLR](#)[TLA](#)[EKLS](#)[SRPE](#)[AVHE](#)[YVTP](#)[LFSR](#)[APNR](#)[KMSG](#)[AHKD](#)[TLRS](#)[AKRF](#)[VKH](#)[NEKIS](#)[VKR](#)[VWLT](#)[EIKL](#)[ADLE](#)[NMV](#)[NYK](#)[NGREI](#)[LYEAL](#)[KARLE](#)[AYG](#)[GNAK](#)[QAFD](#)[PKDN](#)[PFYK](#)[GGQ](#)[LVKA](#)[VRVE](#)[KTQ](#)[ESG](#)[VLLN](#)[KNAY](#)[TIAN](#)[DNAT](#)[MVR](#)[VDVY](#)[TKAG](#)[KNYL](#)[VPVY](#)[WQVA](#)[QGIL](#)[PNRA](#)[VTSG](#)[KSEAD](#)[WDLI](#)[DESFE](#)[FKF](#)[LSR](#)[GDLV](#)[EMIS](#)[NKGR](#)[IFGY](#)[NGLD](#)[RANG](#)[SIGIR](#)[EHD](#)[LEK](#)[SKG](#)[KDG](#)[VHR](#)[VGVT](#)[ATAF](#)[NKYH](#)[VDPL](#)[GKEI](#)[HRC](#)[SSE](#)[PRPT](#)[LKIK](#)[SKKED](#)[KRTAD](#)[GSE](#)[FEP](#)[K](#)[K](#)[R](#)[K](#)[V](#)

| N-Linker Length | N-Linker AA. Seq    | N-Linker nuc. Seq                                           |
|-----------------|---------------------|-------------------------------------------------------------|
| 20              | GGSGSGSGSGSGSGSGSGG | ggcggatcaggaggctctggcggttcaggtggatcaggcgtagcggaggttcaggtggt |
| 10              | SGSGSGSGS           | tctggcggttcaggtggatcaggcgtagc                               |
| 5               | GGSGG               | ggcggttcaggtgga                                             |
| 5               | GGSGG               | ggcggttcaggtgga                                             |
| 0               | n/a                 | n/a                                                         |

| C-linker Length | C-Linker AA. Seq     | C-Linker nuc. Seq                                           |
|-----------------|----------------------|-------------------------------------------------------------|
| 20              | GSSGSETPGTSESATPESSG | ggctcctctggtctgagacacctggcacaagcgagagcgcaacacctgaaagcagcggc |
| 10              | ETPGTSESAT           | gagacacctggcacaagcgagagcgcaaca                              |
| 5               | GTSES                | ggcacaagcgagagc                                             |
| 0               | n/a                  | n/a                                                         |

## Narrow window TadA deaminase variants used in this study

**TAD9e: Tu et al. *Mol Ther.* 2022. DOI: 10.1016/j.ymthe.2022.07.010**

TCTGAGGTGGAGTTTTCCACGAGTACTGGATGAGACATGCCCTGACCCTGGCCAAGAGGGCACGCGATGAGAGGGAGGTGCCTGTGGGAGCCGTGCTGGTGCTGAACAAT  
AGAGTGATCGGCGAGGGCTGGAACAGAGCCATCGGCCTGCACGACCCAACAGCCCATGCCGAAATTATGGCCCTGAGACAGGGCGGCCTGGTCATGCAGAACTACAGACTG  
ATTGACGCCACCCTGTACGTGACATTCGAGCCTTGCCTGATGTGCGCCGGCGCCATGATCCACTCTAGGATCGGCCGCGTGGTGTGGCGTGAGGAACAGCAAAACCGGCGC  
CGCAGGCTCCCTGATGAACGTGCTGAACTACCCCGGCATGAATAAGCACCGCGTCGAAATTACCGAGGGAATCCTGGCAGATGAATGTGCCGCCCTGCTGTGCGACTTCTACC  
GGATGCCTAGAAGACAGGTGTTCAATGCTCAGAAGAAGGCCAGAGCTCCATCAAC

**TAD9: Chen et al. *Nat Chem Biol.* 2023. DOI: 10.1038/s41589-022-01163-8.**

TCTGAGGTGGAGTTTTCCACGAGTACTGGATGAGACATGCCCTGACCCTGGCCAAGAGGGCACGGGATGAGAGGGAGGTGCCTGTGGGAGCCGTGCTGG  
TGCTGAACAATAGAGTGATCGGCGAGGGCTGGAACAGAGCCATCGGCCTGCACGACCCAACAGCCCATGCCGAAATTATGGCCCTGAGACAGGGCGGCCT  
GGTCATGCAGAACTACAGACTGATTGACGCCACCCTGTACGTGACATTCGAGCCTTGCCTGATGTGCGCCGGCGCCATGATCCACTCTAGGATCGGCCGCGT  
GGTGTGGCGTGAGGCAGTCAAAAAGAGGGCGCCGAGGCTCCCTGATGAACGTGCTGAACTACCCCGGCATGAATCACCGCGTCGAAATTACCGAGGGA  
ATCCTGGCAGATGAATGTGCCGCCCTGACCTGCGATTCTATCGGATGCCTAGACAGGTGTTCAATGCTCAGAAGAAGGCCAGAGCTCCATCAAC
